# Supplementary material for: Lanthanide-catalyzed regio- and enantioselective hydrosilylation of aryl-substituted terminal and internal alkenes
Source: Royal Society of Chemistry journal article supplement (doi:10.1039/d2qo01930b), 2023-01-01

## Supporting Information

# Rare-earth-catalyzed regio- and enantioselective hydrosilylation of aryl-substituted terminal and internal alkenes

Chenhao Zhu, Yuqiao Zhou, Jia Yang, Xiaoming Feng and Shunxi Dong\*

Key Laboratory of Green Chemistry & Technology, Ministry of Education, College of Chemistry, Sichuan University, Chengdu 610064, China

### Table of Contents

|                                                                                             |    |
|---------------------------------------------------------------------------------------------|----|
| 1. General remarks .....                                                                    | 2  |
| 2. Preparation of catalysts .....                                                           | 2  |
| 3. Typical procedure for the catalytic asymmetric reaction .....                            | 3  |
| 4. Optimization of the reaction conditions .....                                            | 4  |
| 5. Experimental procedure for the scale-up reaction and transformation of the product ..... | 9  |
| 6. Control experiments .....                                                                | 10 |
| 7. X-ray crystallography data .....                                                         | 14 |
| 8. The analytical and spectral characterization data of products .....                      | 16 |
| 9. Computational methods .....                                                              | 32 |
| 10. References .....                                                                        | 62 |
| 11. Copies of NMR spectra for products .....                                                | 63 |

## 1. General remarks

<sup>1</sup>H NMR spectra were recorded on Bruker ASCENDTM 400M (400 MHz) and ASCENDTM 600M (600 MHz). Chemical shifts were reported in ppm from tetramethylsilane with the solvent resonance as the internal standard (CDCl<sub>3</sub>, δ = 7.26). Spectra were reported as follows: chemical shift (δ ppm), multiplicity (s = singlet, d = doublet, t = triplet, q = quartet, m = multiplet, dd = doublet of doublets, dt = doublet of triplets), coupling constants (Hz), integration and assignment. <sup>13</sup>C{<sup>1</sup>H} NMR spectra were collected on ASCENDTM 400M (101 MHz) and ASCENDTM 600M (153 MHz) with complete proton decoupling. Chemical shifts are reported in ppm from the tetramethylsilane with the solvent resonance as internal standard (CDCl<sub>3</sub>, δ = 77.0). GC-MS analysis was performed on Shimadzu GCMS-2020 NX gas chromatograph with a SH-I-5MS column. Enantiomeric ratio (er) were determined by HPLC analysis using the corresponding commercial chiral column as stated in the experimental procedures at 23 °C with UV detector at 254 nm. Optical rotations were measured on Rudolph Research Analytic Automatic Polarimeter and reported as follows: [α]<sub>D</sub><sup>T</sup> (c g/100 mL, in CH<sub>2</sub>Cl<sub>2</sub>). Infrared spectra (IR) were recorded on Bruker Tensor II spectrometer with Plantium ATR accessory and the peaks were reported as absorption maxima (ν, cm<sup>-1</sup>). Melting point ranges were determined on OptiMelt. X-ray crystallographic data were collected by a Bruker D8 Venture Photon II. All manipulations were carried out using standard Schlenk, high-vacuum and glovebox techniques unless otherwise noted. The solvents (THF, toluene, *n*-pentane and *n*-hexane) were freshly distilled from sodium prior to use. Alkenes were prepared according to Wittig reaction or the previously reported procedures.<sup>[1]</sup> Phenylsilanes were prepared according to the previously reported procedures.<sup>[2]</sup> Alkenes and phenylsilanes were vacuum-distilled over CaH<sub>2</sub> prior to use. Other chemicals were of analytical grade and were used as received. La(HMDS)<sub>3</sub>, Y(HMDS)<sub>3</sub>, Cd(HMDS)<sub>3</sub> were purchased from Sigma-Aldrich. Ce(HMDS)<sub>3</sub>, Nd(HMDS)<sub>3</sub> was prepared according to known procedures.<sup>[3]</sup>

## 2. Preparation of catalysts

### 2.1 General procedure for the synthesis of rare-earth/bis(oxazoline) complexes.

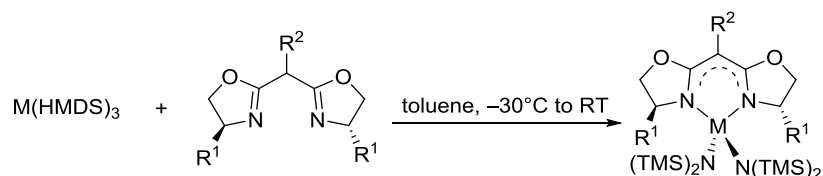

Bis(oxazoline) were synthesized according to the reported procedure<sup>[4]</sup>.

**General Procedure (GP):** In a glovebox, a dry Schlenk bottle was charged with rare earth metal amide and toluene (0.2 mol/L). Then, a solution of bis(oxazoline) in toluene (1 equiv.) was slowly added to the stirred solution at -30 °C and the resulting reaction mixture was warmed up and stirred at room temperature for more than 12 h. The volatiles were removed under vacuum. The remaining residue was extracted by *n*-hexane and the filtrate was removed under vacuum to afford the desired chiral catalyst.

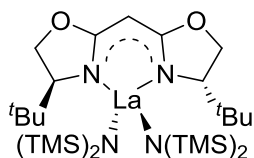

**La-BOX-tBu** (C<sub>27</sub>H<sub>61</sub>LaN<sub>4</sub>O<sub>2</sub>Si<sub>4</sub>) Prepared according to the general procedure to yield 620.0 mg (85%) of yellow solid. <sup>1</sup>H NMR (400 MHz, Benzene-*d*<sub>6</sub>) δ 4.68 (s, 1H), 3.74 – 3.65 (m, 6H), 0.81 (s, 18H), 0.38 (s, 36H). <sup>13</sup>C{<sup>1</sup>H} NMR (101 MHz, Benzene-*d*<sub>6</sub>) δ 172.7, 74.8, 68.0, 57.5, 34.6, 26.9, 4.7.

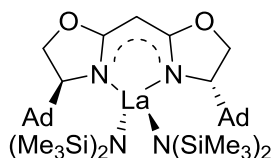

**La-BOX-Ad** (C<sub>39</sub>H<sub>73</sub>LaN<sub>4</sub>O<sub>2</sub>Si<sub>4</sub>) Prepared according to the general procedure to yield 47.0 mg (53%) of pale brown solid. <sup>1</sup>H NMR (400 MHz, Benzene-*d*<sub>6</sub>) δ 4.65 (s, 1H), 3.94 (dd, *J* = 8.3, 3.1 Hz, 2H), 3.85 (dd, *J* = 8.8, 3.1 Hz, 2H), 3.77 (t, *J* = 8.5 Hz, 2H), 1.61 (s, 15H), 1.36 (s, 15H), 0.39 (s, 36H). <sup>13</sup>C{<sup>1</sup>H} NMR (101 MHz, Benzene-*d*<sub>6</sub>) δ 173.6, 74.7, 66.5, 57.7, 38.9, 38.6, 37.1, 36.9, 31.7, 30.2, 28.4, 23.1, 5.0.

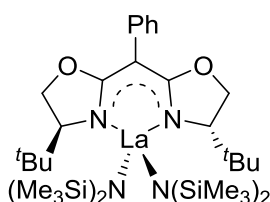

**La-<sup>Ph</sup>BOX-tBu** (C<sub>33</sub>H<sub>65</sub>LaN<sub>4</sub>O<sub>2</sub>Si<sub>4</sub>) Prepared according to the general procedure to yield 53 mg (66%) of yellow solid. <sup>1</sup>H NMR (400 MHz, Benzene-*d*<sub>6</sub>) δ 7.62 – 7.52 (m, 2H), 7.32 (t, *J* = 7.6 Hz, 2H), 7.13 (t, *J* = 7.4 Hz, 1H), 3.89 (dd, *J* = 8.5, 2.9 Hz, 2H), 3.68 (dd, *J* = 9.0, 2.9 Hz, 2H), 3.61 (t, *J* = 8.7 Hz, 2H), 0.85 (s, 18H), 0.37 (s, 36H). <sup>13</sup>C{<sup>1</sup>H} NMR (101 MHz, Benzene-*d*<sub>6</sub>) δ 172.5, 138.9, 133.2, 125.5, 75.4, 73.7, 67.9, 35.2, 26.4, 4.9.

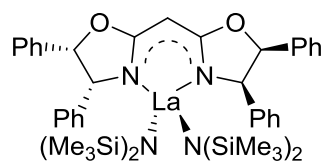

**La-BOX-DPh** (C<sub>43</sub>H<sub>61</sub>LaN<sub>4</sub>O<sub>2</sub>Si<sub>4</sub>) Prepared according to the general procedure to yield 68.0 mg (74%) of yellow solid. <sup>1</sup>H NMR (400 MHz, Benzene-*d*<sub>6</sub>) δ 7.03 – 6.98 (m, 4H), 6.97 – 6.90 (m, 9H), 6.90 – 6.85 (m, 5H), 6.84 (s, 2H), 5.68 (d, *J* = 8.2 Hz, 2H), 5.56 (d, *J* = 8.2 Hz, 2H), 5.25 (s, 1H), 0.21 (s, 36H). <sup>13</sup>C{<sup>1</sup>H} NMR (101 MHz, Benzene-*d*<sub>6</sub>) δ 174.4, 139.0, 136.3, 128.7, 128.5, 126.6, 84.8, 72.3, 58.6, 4.0.

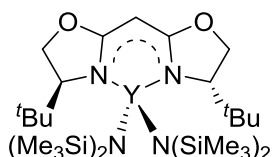

**Y-BOX-tBu** (C<sub>27</sub>H<sub>61</sub>YN<sub>4</sub>O<sub>2</sub>Si<sub>4</sub>) Prepared according to the general procedure to yield 30.0 mg (41%) of pale brown solid. <sup>1</sup>H NMR (400 MHz, Benzene-*d*<sub>6</sub>) δ 4.66 (s, 1H), 4.01 (dd, *J* = 8.5, 3.1 Hz, 2H), 3.83 – 3.73 (m, 4H), 0.84 (s, 18H), 0.38 (s, 36H). <sup>13</sup>C{<sup>1</sup>H} NMR (101 MHz, Benzene-*d*<sub>6</sub>) δ 174.4, 174.4, 74.2, 68.4, 58.5, 34.9, 26.3, 6.1

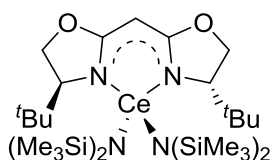

**Ce-BOX-tBu** (C<sub>27</sub>H<sub>61</sub>CeN<sub>4</sub>O<sub>2</sub>Si<sub>4</sub>) Prepared according to the general procedure to yield 30.0 mg (41%) of pale brown solid. Complexes **Ce-BOX-tBu** are paramagnetic and display broad NMR signals. The structure was confirmed by X-ray single-crystal analysis.

### 3. Typical procedure for the catalytic asymmetric reaction

#### 3.1 General procedure for the synthesis of chiral hydrosilylation of aryl-substituted terminal alkenes

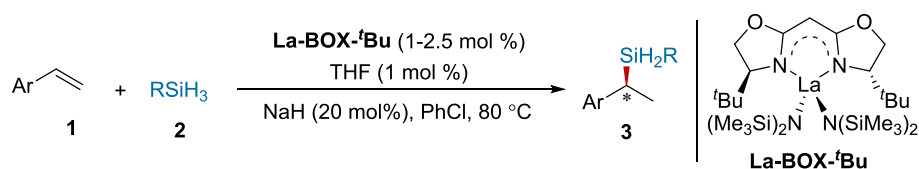

In a glovebox, a dry reaction tube was charged with **La-BOX-tBu** (1 mol %, 3.6 mg), olefins **1** (0.50 mmol) and phenylsilanes **2** (0.50 mmol). Then, chlorobenzene (0.50 mL), THF (1 mol %, 0.4 μL) and NaH (20 mol %, 2.4 mg) was added under argon atmosphere and the mixture was stirred at corresponding temperature for the indicated time. The residue was subjected to flash chromatography on silica gel (Eluent: petroleum) to afford the desired chiral product **3**.

#### 3.2 General procedure for the chiral hydrosilylation of aryl-substituted internal alkenes

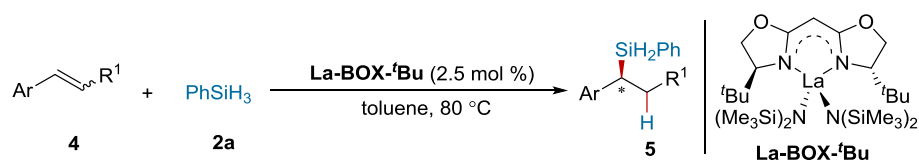

In a glovebox, a dry reaction tube was charged with **La-BOX-tBu** (2.5 mol %, 9.1 mg), phenylsilane **2a** (0.50 mmol) and aryl-substituted internal alkenes **4** (0.50 mmol). Then, toluene (0.50 mL) was added under argon atmosphere and the mixture was stirred at corresponding temperature for the indicated time. The residue was purified by flash chromatography on silica gel (Eluent: petroleum) to afford the desired chiral product **5**.

## 4. Optimization of the reaction conditions

### 4.1. Hydrosilylation of terminal alkenes.

#### (a) Screening of different rare-earth metal salts.<sup>[a]</sup>

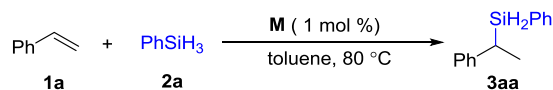

| Entry <sup>[a]</sup> | M                     | Radius (Å) | Yield (%) <sup>[b]</sup> | b:1   |
|----------------------|-----------------------|------------|--------------------------|-------|
| 1                    | La(HMDS) <sub>3</sub> | 1.032      | 71                       | 19:1  |
| 2                    | Ce(HMDS) <sub>3</sub> | 1.01       | 68                       | 11:1  |
| 3                    | Nd(HMDS) <sub>3</sub> | 0.983      | 50                       | 9:1   |
| 4                    | Gd(HMDS) <sub>3</sub> | 0.938      | 36                       | 5.5:1 |
| 5                    | Y(HMDS) <sub>3</sub>  | 0.900      | 7                        | 6:1   |
| 6                    | Er(HMDS) <sub>3</sub> | 0.890      | NR                       | -     |

[a] All reactions were carried out with rare-earth metal salts (2.5 mol %), ethenylbenzene **1a** (0.50 mmol) and phenylsilane **2a** (0.50 mmol) in toluene (0.5 mL) at 80 °C for 22 h.  
[b] Yield was determined by <sup>1</sup>H NMR.

**Note:** The above results indicated that the radius of rare-earth ions had a significant effect on the reactivity and regioselectivity. La(HMDS)<sub>3</sub> with large ionic radius (1.032 Å) provided the desired product in high yield and regioselectivity. Therefore, La(HMDS)<sub>3</sub> was selected the central metal for further investigation.

**(b) Screening of chiral ligands.**<sup>[a]</sup>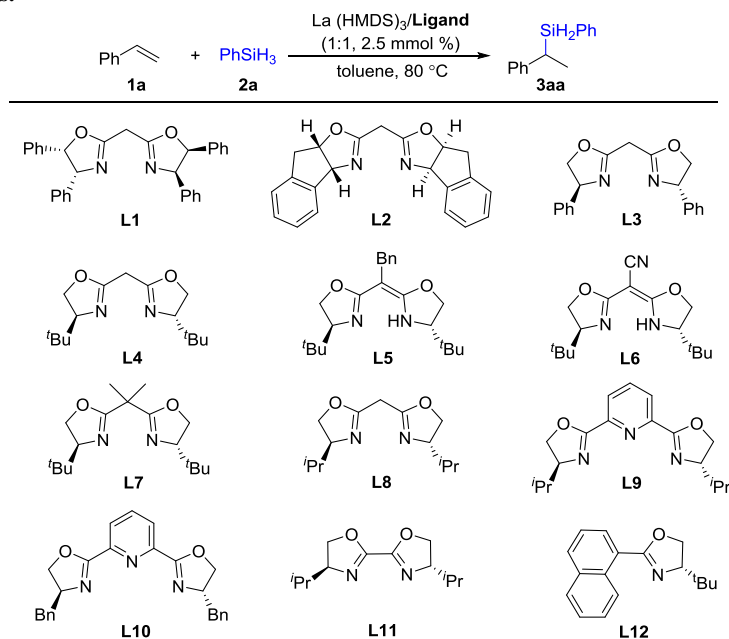

| Entry <sup>[a]</sup>  | Ligand | Yield (%) <sup>[b]</sup> | b:l   | er (%) <sup>[c]</sup> |
|-----------------------|--------|--------------------------|-------|-----------------------|
| 1                     | L1     | 76                       | 15:1  | 51:49                 |
| 2                     | L2     | 67                       | 10:1  | 58.5:41.5             |
| 3                     | L3     | 74                       | 13:1  | racemic               |
| 4                     | L4     | 70                       | >19:1 | 76.5:23.5             |
| 5                     | L5     | 32                       | >19:1 | 58:42                 |
| 6                     | L6     | 51                       | 14:1  | 56:44                 |
| 7                     | L7     | 86                       | >19:1 | racemic               |
| 8                     | L8     | 67                       | >19:1 | 54.5:45.5             |
| 9                     | L9     | 12                       | 17:1  | 56.5:43.5             |
| 10                    | L10    | 32                       | >19:1 | 52.5:47.5             |
| 11                    | L11    | 77                       | >19:1 | racemic               |
| 12                    | L12    | 83                       | >19:1 | 51:49                 |
| 13 <sup>[d]</sup>     | L4     | 81                       | >19:1 | 88:12                 |
| 14 <sup>[d],[e]</sup> | L4     | 79                       | >19:1 | 89:11                 |

[a] Unless otherwise noted, all reactions were carried out with in-situ generated catalyst. La(HMDS)<sub>3</sub>/Ligand (1:1, 2.5 mol %) in toluene (0.5 mL) was stirred at room temperature for 12 h. Then, ethenylbenzene **1a** (0.50 mmol) and phenylsilane **2a** (0.50 mmol) was added, the resulting mixture was stirred at 80 °C for 22 h. [b] Yield was determined by <sup>1</sup>H NMR. [c] Determined by HPLC analysis on a chiral stationary phase. [d] The catalyst La-BOX-<sup>t</sup>Bu was prepared in advance. [e] La-BOX-<sup>t</sup>Bu (1 mol %)

**(b) Screening of different rare-earth metal salts.**<sup>[a]</sup>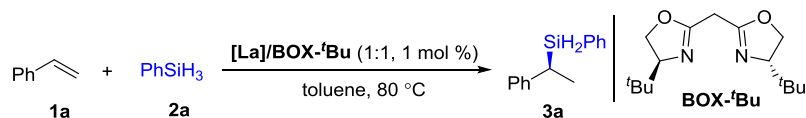

| Entry <sup>[a]</sup> | [La]                                                                                | Yield (%) <sup>[b]</sup> | b:l   | er (%) <sup>[c]</sup> |
|----------------------|-------------------------------------------------------------------------------------|--------------------------|-------|-----------------------|
| 1                    | La(HMDS) <sub>3</sub>                                                               | 80                       | >19:1 | 81.5:18.5             |
| 2                    | La(CH <sub>2</sub> C <sub>6</sub> H <sub>4</sub> NMe <sub>2</sub> -o) <sub>3</sub>  | 20                       | >19:1 | 70:30                 |
| 3                    | La(2,6- <sup>t</sup> Bu <sub>2</sub> -C <sub>6</sub> H <sub>3</sub> O) <sub>3</sub> | NR                       | -     | -                     |
| 4                    | La(CH <sub>2</sub> TMS) <sub>3</sub>                                                | trace                    | -     | -                     |
| 5 <sup>[d]</sup>     | La-BOX- <sup>t</sup> Bu                                                             | 79                       | >19:1 | 89:11                 |
| 6 <sup>[d],[e]</sup> | La-BOX- <sup>t</sup> Bu                                                             | 76                       | >19:1 | 76.5:23.5             |

[a] Unless otherwise noted, all reactions were carried out with in-situ generated catalyst. La<sup>III</sup>-**Box**-*t*-Bu (1:1, 1 mol %) in toluene (0.5 mL) was stirred at room temperature for 12 h. Then, ethenylbenzene **1a** (0.50 mmol) and phenylsilane **2a** (0.50 mmol) was added and the resulting mixture was stirred at 80 °C for 22 h. [b] Yield was determined by <sup>1</sup>H NMR. [c] Determined by HPLC analysis on a chiral stationary phase. [d] The catalyst **La-BOX-*t*-Bu** was prepared in advance. [e] 1,1,1,3,3,3-hexamethyldisilazane (1 mol %) was added.

**Note:** The above outcomes suggested that the basic ligand had a significant effect on the reactivity and enantioselectivity. Moreover, 1,1,1,3,3,3-hexamethyldisilazane generated in the process of catalyst preparation exhibited an adverse influence on the enantioselectivity.

**(c) Screening of the solvents.**<sup>[a]</sup>

| Entry <sup>[a]</sup> | Solvent                | Yield (%) <sup>[b]</sup> | b:l   | er (%) <sup>[c]</sup> |
|----------------------|------------------------|--------------------------|-------|-----------------------|
| 1                    | toluene                | 79                       | >19:1 | 89:11                 |
| 2                    | benene                 | 18                       | >19:1 | 82:18                 |
| 3                    | THF                    | 40                       | >19:1 | 73:27                 |
| 4                    | MTBE                   | 55                       | >19:1 | 74:26                 |
| 5                    | Et <sub>2</sub> O      | 79                       | >19:1 | 87.5:12.5             |
| 6                    | cyclohexane            | 75                       | >19:1 | 86:14                 |
| 7                    | toluene <sup>[d]</sup> | 79                       | >19:1 | 89:11                 |
| 8                    | toluene <sup>[e]</sup> | 75                       | >19:1 | 88:12                 |
| 9                    | chlorobenzene          | 79                       | >19:1 | 90:10                 |
| 10                   | benzotrifluoride       | trace                    | >19:1 | -                     |
| 11                   | <i>o</i> -xylene       | 9                        | >19:1 | 73:27                 |
| 12                   | <i>m</i> -xylene       | 48                       | >19:1 | 85.5:14.5             |
| 13                   | <i>p</i> -xylene       | 66                       | >19:1 | 85:15                 |
| 14                   | mesitylene             | 55                       | >19:1 | 77.5:22.5             |
| 15 <sup>[f]</sup>    | chlorobenzene          | 76                       | >19:1 | 90.5:9.5              |

[a] Unless otherwise noted, all reactions were carried out with **La-BOX-*t*-Bu** (1 mol %, 3.6 mg), phenylsilanes (0.50 mmol), ethenylbenzene (0.50 mmol) and chlorobenzene (0.50 mL) at 80 °C for 22 h. [b] Yield was determined by <sup>1</sup>H NMR. [c] Determined by HPLC analysis on a chiral stationary phase. [d] 0.3 mL. [e] 1 mL. [f] THF (0.4 μL) was added. THF: tetrahydrofuran, MTBE: methyl *t*-butyl ether.

According to previous work<sup>[5]</sup> by Teuben, we envisioned that the addition of THF was benefit to the stereoselectivity through coordination with presume rare-earth hydride species.

**(d) Screening of the additive.**<sup>[a]</sup>

| Entry <sup>[a]</sup> | Additive                     | Yield (%) <sup>[b]</sup> | b:l   | er (%) <sup>[c]</sup> |
|----------------------|------------------------------|--------------------------|-------|-----------------------|
| 1                    | no additive                  | 76                       | >19:1 | 90.5:9.5              |
| 2                    | NaH (50 mol %)               | 99                       | >19:1 | 91:9                  |
| 3                    | NaH (20 mol %)               | 99                       | >19:1 | 92.5:7.5              |
| 4                    | NaH (10 mol %)               | 96                       | >19:1 | 90.5:9.5              |
| 5                    | NaH (10 mol %)               | 93                       | >19:1 | 90:10                 |
| 6                    | CaH <sub>2</sub> (20 mol %)  | 88                       | >19:1 | 88.5:11.5             |
| 7                    | CaH <sub>2</sub> (10 mol %)  | 92                       | >19:1 | 89:11                 |
| 8                    | NaBH <sub>4</sub> (20 mol %) | 92                       | >19:1 | 89.5:10.5             |
| 9                    | NaBH <sub>4</sub> (10 mol %) | 86                       | >19:1 | 89:11                 |

|    |                               |    |       |           |
|----|-------------------------------|----|-------|-----------|
| 10 | LiAlH <sub>4</sub> (20 mol %) | 90 | >19:1 | racemic   |
| 11 | LiAlH <sub>4</sub> (10 mol %) | 88 | >19:1 | racemic   |
| 12 | KH (20 mol %)                 | 94 | >19:1 | 81.5:18.5 |
| 13 | KH (10 mol %)                 | 96 | >19:1 | 89:11     |

[a] Unless otherwise noted, all reactions were carried out with **La-BOX-<sup>t</sup>Bu** (1 mol %, 3.6 mg), phenylsilanes (0.50 mmol), ethenylbenzene (0.50 mmol), chlorobenzene (0.50 mL), THF (0.4 μL) and additive (20 mol%) at 80 °C for 22 h. [b] Yield was determined by <sup>1</sup>H NMR. [c] Determined by HPLC analysis on a chiral stationary phase.

(e) Screening of reaction temperature.<sup>[a]</sup>

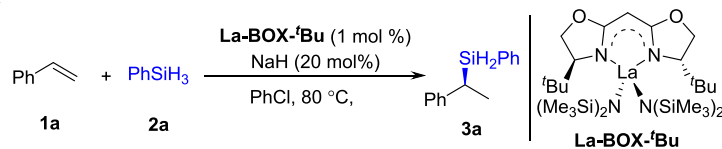

| Entry <sup>[a]</sup> | T (°C) | Yield (%) <sup>[b]</sup> | b:l   | er (%) <sup>[c]</sup> |
|----------------------|--------|--------------------------|-------|-----------------------|
| 1                    | 80     | 99                       | >19:1 | 92.5:7.5              |
| 2                    | 100    | 92                       | >19:1 | 88:12                 |
| 3                    | 60     | 63                       | >19:1 | 89.5:10.5             |
| 4                    | 40     | trace                    | >19:1 | 75:25                 |

[a] Unless otherwise noted, all reactions were carried out with **La-BOX-<sup>t</sup>Bu** (1 mol %, 3.6 mg), phenylsilanes (0.50 mmol), olefins (0.50 mmol), chlorobenzene (0.50 mL), THF (0.4 μL) and NaH (20 mol %, 2.4 mg) at 80 °C for 22 h. [b] Yield was determined by <sup>1</sup>H NMR. [c] Determined by HPLC analysis on a chiral stationary phase.

(f) Scope limitation

olefins

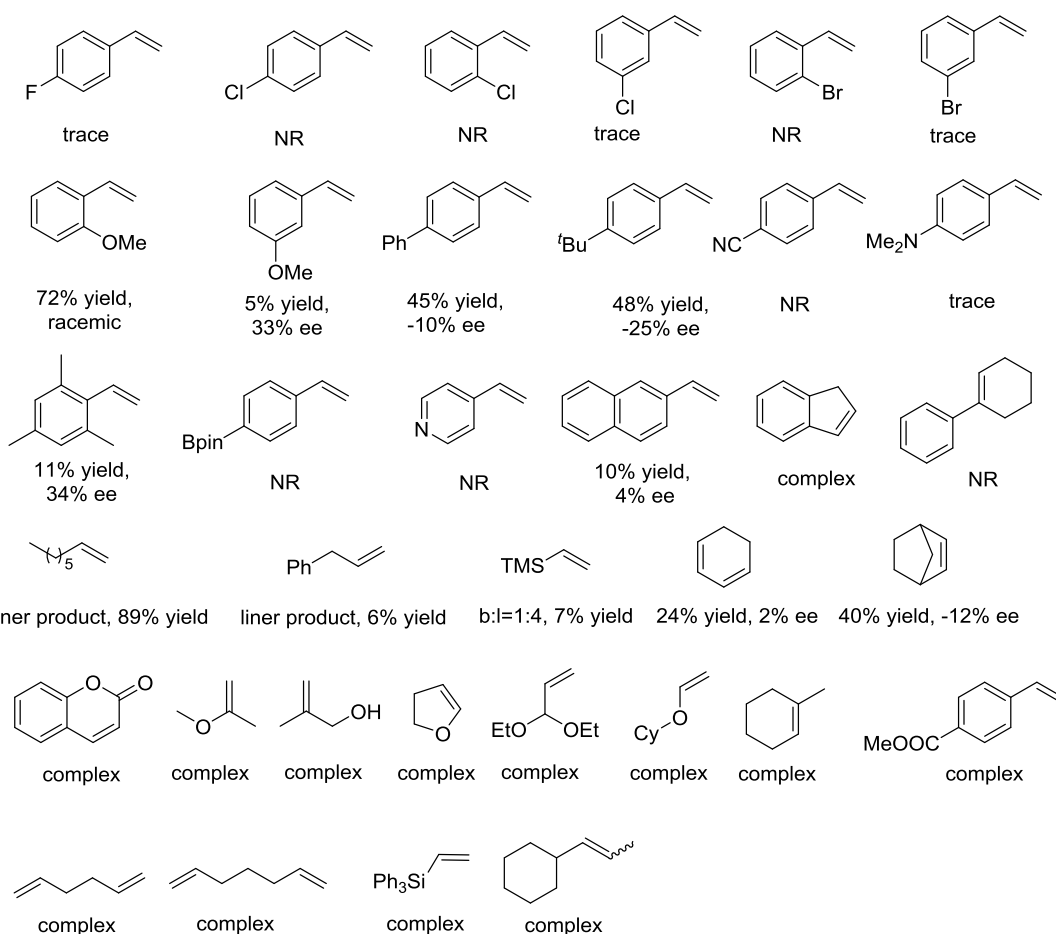

liner product, 89% yield    liner product, 6% yield    b:l=1:4, 7% yield    24% yield, 2% ee    40% yield, -12% ee

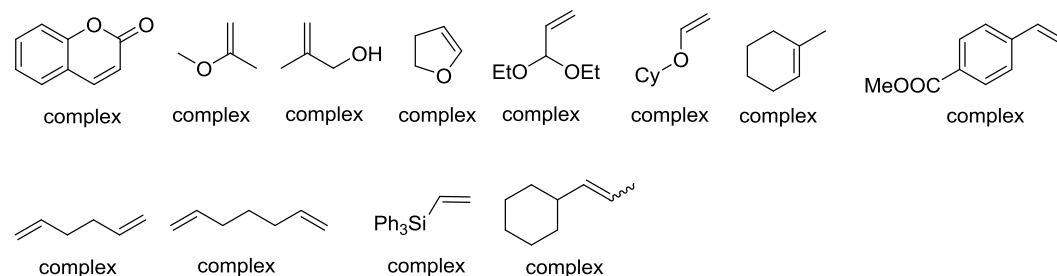

silanes

Ph<sub>2</sub>SiH<sub>2</sub>    PhMeSiH<sub>2</sub>    *n*-hexSiH<sub>3</sub>  
 trace    trace    79% yield,  
 29% ee

## 4.2 Hydrosilylation of internal alkenes.

### (a) Screening of different rare-earth metal salts.<sup>[a]</sup>

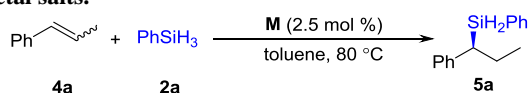

| Entry <sup>[a]</sup> | M                           | Radius (Å) | Yield (%) <sup>[b]</sup> |
|----------------------|-----------------------------|------------|--------------------------|
| 1                    | <b>La(HMDS)<sub>3</sub></b> | 1.032      | 94                       |
| 2                    | <b>Ce(HMDS)<sub>3</sub></b> | 1.01       | 99                       |
| 3                    | <b>Gd(HMDS)<sub>3</sub></b> | 0.938      | 78                       |
| 4                    | <b>Y(HMDS)<sub>3</sub></b>  | 0.900      | trace                    |

[a] Unless otherwise noted, all reactions were carried out with **M** (2.5 mol %), phenylsilanes (0.50 mmol), olefins (0.50 mmol) in toluene (0.5 mL) at 80 °C for 24 h. [b] Yield was determined by NMR.

**Note:** The above results indicated that the radius of rare-earth ions had a significant effect on the reactivity and regioselectivity. **La(HMDS)<sub>3</sub>** and **Ce(HMDS)<sub>3</sub>** with large ionic radius provided the desired product in high yield. Therefore, **La(HMDS)<sub>3</sub>** was selected the central metal for further investigation because it was commercially available.

### (b) Optimization of the reaction conditions.<sup>[a]</sup>

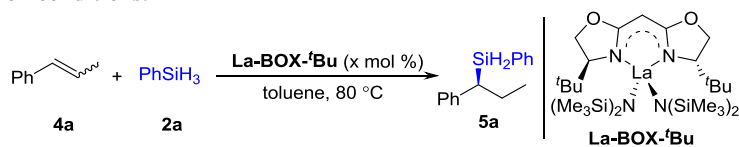

| Entry <sup>[a]</sup> | solvent          | x (mol%) | Yield (%) <sup>[b]</sup> | b:l   | er (%) <sup>[c]</sup> |
|----------------------|------------------|----------|--------------------------|-------|-----------------------|
| 1                    | toluene          | 1        | 57                       | >19:1 | 86.5:13.5             |
| 2                    | toluene          | 2.5      | 67                       | >19:1 | 83.5:16.5             |
| 3                    | chlorobenzene    | 2.5      | 57                       | >19:1 | 86.5:13.5             |
| 4                    | <i>m</i> -xylene | 2.5      | 50                       | >19:1 | 82:18                 |
| 5                    | <i>p</i> -xylene | 2.5      | 46                       | >19:1 | 82.5:17.5             |
| 6 <sup>[d]</sup>     | toluene          | 2.5      | 82                       | >19:1 | 88.5:11.5             |
| 7 <sup>[d],[e]</sup> | toluene          | 2.5      | trace                    | -     | -                     |
| 8 <sup>[d],[f]</sup> | toluene          | 2.5      | 78                       | >19:1 | 88.5:11.5             |
| 9 <sup>[d],[g]</sup> | toluene          | 2.5      | trace                    | -     | -                     |

[a] Unless otherwise noted, all reactions were carried out with **La-BOX-<sup>t</sup>Bu** (x mol %), phenylsilanes (0.10 mmol), olefins (0.10 mmol) in toluene (0.1 mL) at 80 °C for 24 h. [b] Yield was determined by NMR. [c] Determined by HPLC analysis on a chiral stationary phase. [d] 0.50 mmol scale. [e] **Y-BOX-<sup>t</sup>Bu** (2.5 mol %) was used. [f] NaH (20 mol %, 2.4 mg) was added. [g] **Ce-BOX-<sup>t</sup>Bu** (2.5 mol %) was used.

**Note:** During the process of optimization, we found that 0.5 mmol scale reaction could assure reproducibility probably due to the small amount of solvent and volatility of product.



## 5. Experimental procedure for the scale-up reaction and transformation of the product

a) Scale-up Reaction.

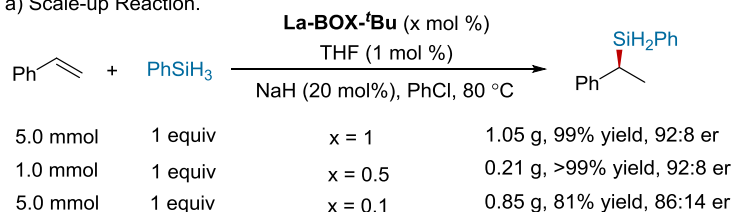

b) Further Transformations of the Chiral Products.

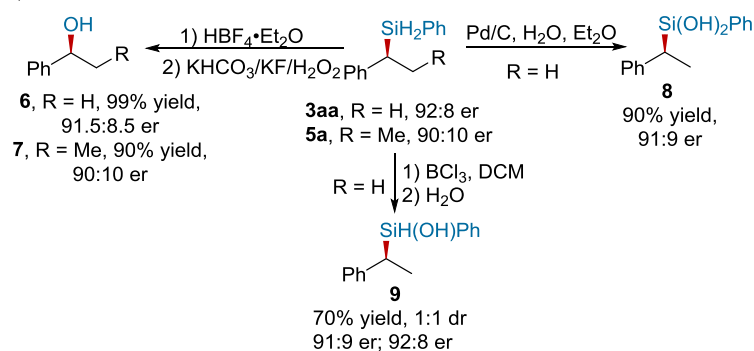

i) A Schlenk bottle was charged with **La-BOX-<sup>t</sup>Bu** (1 mol%, 36.4 mg), phenylsilanes (5.0 mmol) and olefins (5.0 mmol). Then, chlorobenzene (5 mL), THF (4  $\mu$ L) and NaH (20 mol %, 24.0 mg) was added under argon atmosphere and the mixture was stirred at 80  $^\circ$ C for 22 h. The residue was subjected to flash chromatography on silica gel (Eluent: petroleum) to afford the desired chiral product **3aa** (1.05 g, 99% yield, 92:8 er).

ii) **Preparation of (S)-1-Phenylethan-1-ol (6)**. Prepared according to a previous reported method<sup>[8a]</sup>. To a 50 mL vial, **3aa** (0.106 g, 0.5 mmol) and 25 mL of DCM were added. The solution was stirred at 0  $^\circ$ C. Then  $\text{HBF}_4 \cdot \text{Et}_2\text{O}$  (0.426 g, 2.6 mmol, 50% Wt) was added. After stirred for 3 h at ambient temperature, the solvent was removed under reduced pressure. To the residue, 3.0 mL of THF, 3.0 mL of MeOH, KF (0.116 g, 2 mmol),  $\text{KHCO}_3$  (0.50 g, 5.0 mmol) and  $\text{H}_2\text{O}_2$  (2.5 mL, 30% Wt) were added in sequence. After stirred at room temperature for 15 h, the mixture was diluted with  $\text{H}_2\text{O}$ , extracted with  $\text{Et}_2\text{O}$  for three times. The combined organic layers were washed with brine, dried over  $\text{Na}_2\text{SO}_4$  and concentrated in vacuo. The crude mixture was subjected to flash column chromatography silica gel and eluted with PE/EtOAc (4/1, v/v) to give 60.4 mg (0.495 mmol, 99% yield, 91.5:8.5 er) of the title compound **6** as a colorless oil.

iii) **Preparation of (S)-1-Phenylpropan-1-ol (7)**. Prepared according to a previous reported method<sup>[8a]</sup>. To a 50 mL vial, **5a** (0.027 g, 0.12 mmol) and 5 mL of DCM were added. The solution was stirred at 0  $^\circ$ C. Then  $\text{HBF}_4 \cdot \text{Et}_2\text{O}$  (0.102 g, 0.6 mmol, 50% Wt) was added. After stirred for 3 h at ambient temperature, the solvent was removed under reduced pressure. To the residue, 0.8 mL of THF, 0.8 mL of MeOH, KF (0.028 g, 0.48 mmol),  $\text{KHCO}_3$  (0.12 g, 1.2 mmol) and  $\text{H}_2\text{O}_2$  (0.6 mL, 30% Wt) were added in sequence. After stirred at room temperature for 15 h, the mixture was diluted with  $\text{H}_2\text{O}$ , extracted with  $\text{Et}_2\text{O}$  for three times. The combined organic layers were washed with brine, dried over  $\text{Na}_2\text{SO}_4$  and concentrated in vacuo. The crude mixture was subjected to flash column chromatography silica gel and eluted with PE/EtOAc (4/1, v/v) to give 15 mg (0.11 mmol, 92% yield, 90:10 er) of the title compound **7** as a colorless oil.

iv) **Preparation of (S)-Phenyl(1-phenylethyl)silane diol (8)**. Prepared according to a previous reported method<sup>[6]</sup> using **3aa** (0.13 g, 0.62 mmol), Pd/C (0.062 g, 0.059 mmol, 10% Wt),  $\text{H}_2\text{O}$  (0.2 mL) and  $\text{Et}_2\text{O}$  (2.0 mL). After stirred overnight, the mixture was then filtered through Celite, dried over  $\text{Na}_2\text{SO}_4$  and concentrated in vacuo. The crude mixture was subjected to flash column chromatography on silica gel and eluted with PE/EtOAc (4/1, v/v) to give 0.134 g (0.55 mmol, 90% yield, 91:9 er) of the title compound **8** as a white solid.

v) **Preparation of (S)-Phenyl((S)-1-phenylethyl)silanol (9)**. Prepared according to a previously reported method<sup>[6]</sup> using **3aa** (0.106 g, 0.5 mmol),  $\text{BCl}_3$  (0.5 mmol, 0.5 mL, 1.0 M in DCM),  $\text{H}_2\text{O}$  (1.2 mL) and DCM (2.0 mL). After stirred overnight, the mixture was then diluted with  $\text{H}_2\text{O}$  and extracted with DCM for three times. The combined organic layers were washed with brine, dried over  $\text{Na}_2\text{SO}_4$  and concentrated in vacuo. The crude mixture was subjected to flash column chromatography on silica gel and eluted with PE/EtOAc (10/1, v/v) to give 79.0 mg (0.35 mmol, 70% yield) of the title compound **9** as a colorless oil with 1:1 dr.



## The La hydride formation

We believe that the La hydride may be formed by the reaction of **La-Box-Bu** with  $\text{PhSiH}_3$ , and the addition of sodium hydride can accelerate this process. To prove this hypothesis, we conducted the following experiments.

**NaH (0.1mmol) + La-Box-Bu (0.025mmol)**

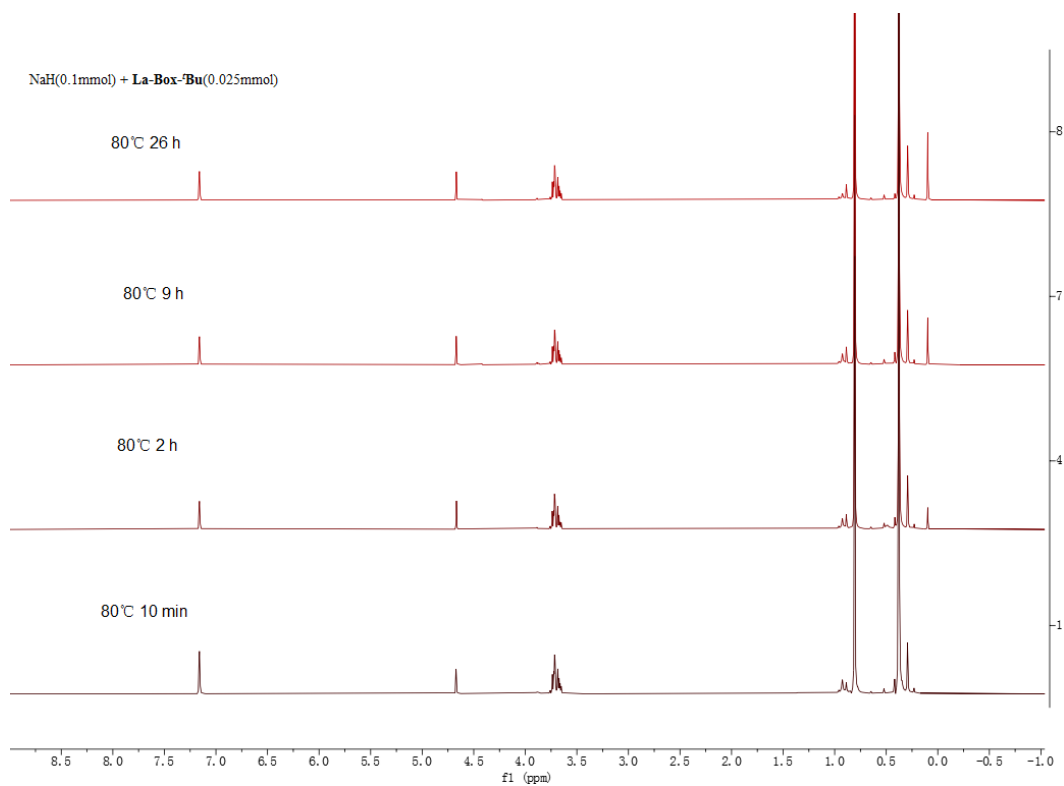

**Note:** Heating the mixture of **La-Box-Bu** and NaH in toluene led to no change at 80 °C after 26 h, which suggested that the form of ate complex with La amide was not feasible in current system.

**PhSiH<sub>3</sub> (0.025mmol) + La-Box-Bu (0.025mmol) + mesitylene (0.025mmol, internal standard)**

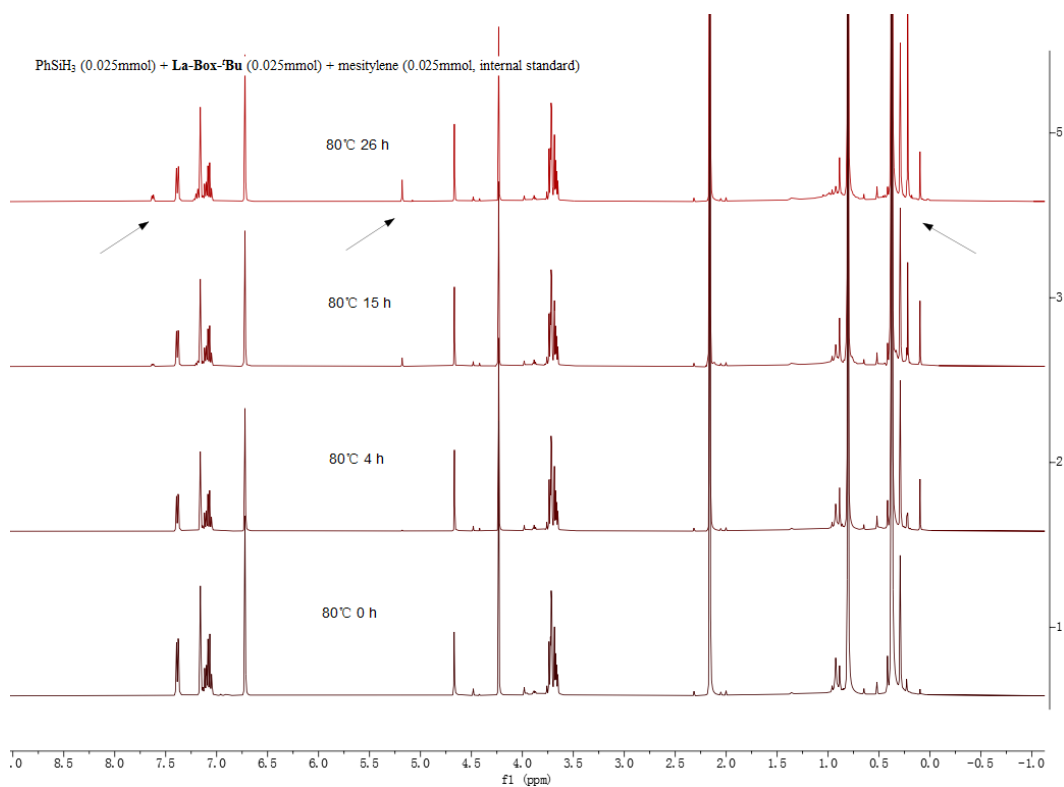

**Note:** According to the of  $^1\text{H}$  NMR spectra, the reaction of  $\text{PhSiH}_3$  (0.025mmol) with **La-Box-Bu** occurred slowly at 80 °C. The product was isolated and characterized. The  $^1\text{H}$  NMR spectrum and GC-MS analysis suggested this new compound was  $\text{TMS}_2\text{SiH}_2\text{Ph}$ . The above results indicated that LaH may be formed. However, we could not isolate this very active species at current stage.

The characterized data were in according with those in the literature<sup>[8e]</sup>.

Spectrum

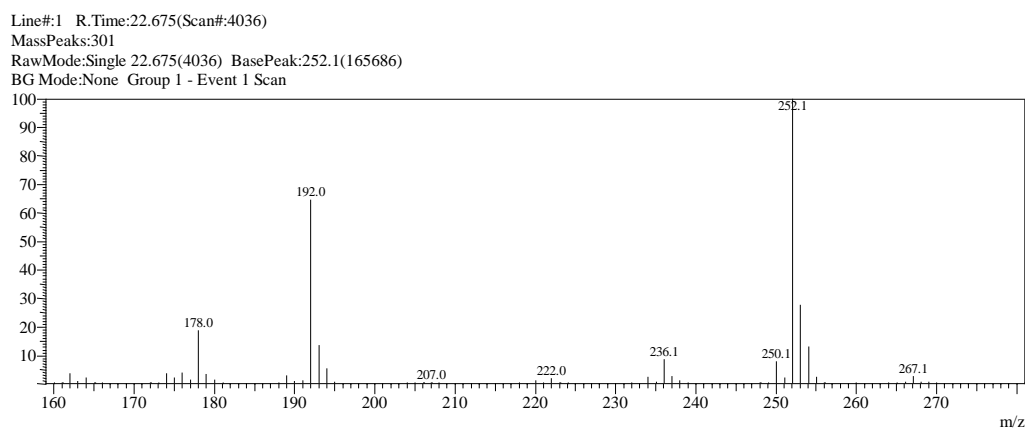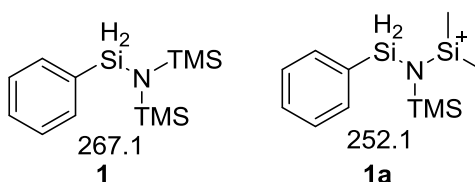

(3) **NaH** (0.1mmol) +  $\text{PhSiH}_3$  (0.025mmol) + **La-Box-Bu** (0.025mmol) + mesitylene(0.025mmol)

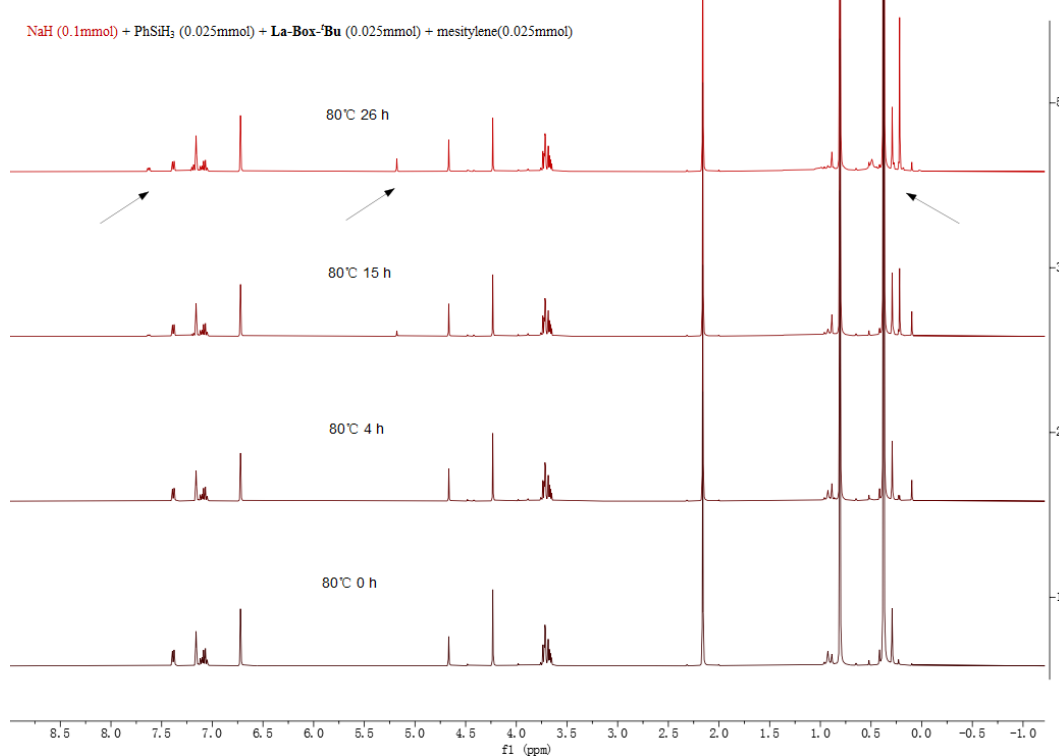

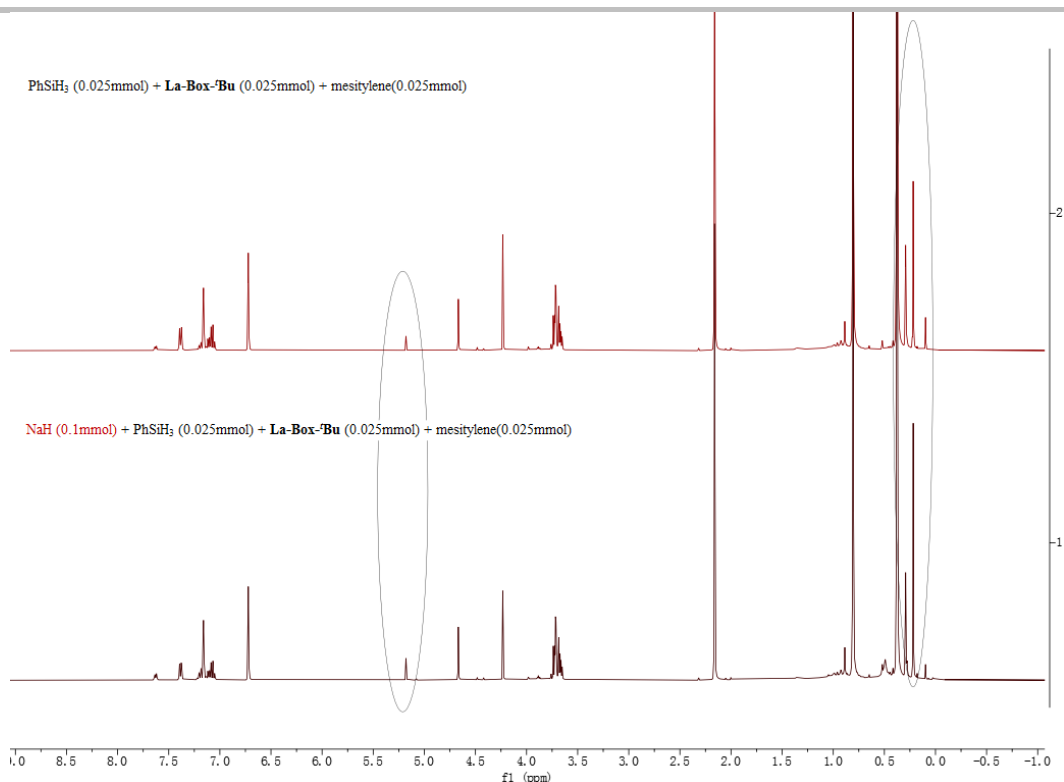

**Note:** According to the NMR analysis, the amount of  $\text{TMS}_2\text{SiH}_2\text{Ph}$  increased slightly with the addition of NaH (from 8.25% to 8.7%).

- (4)  $\beta$ -methylstyrene (0.5mmol) + **NaH (0.1mmol)** + **La-Box-Bu** (0.005mmol) +  $\text{PhSiH}_3$  (0.5mmol) + mesitylene(0.1mmol)  
 (5)  $\beta$ -methylstyrene (0.5mmol) + **La-Box-Bu** (0.005mmol) +  $\text{PhSiH}_3$  (0.5mmol) + mesitylene (0.1mmol)

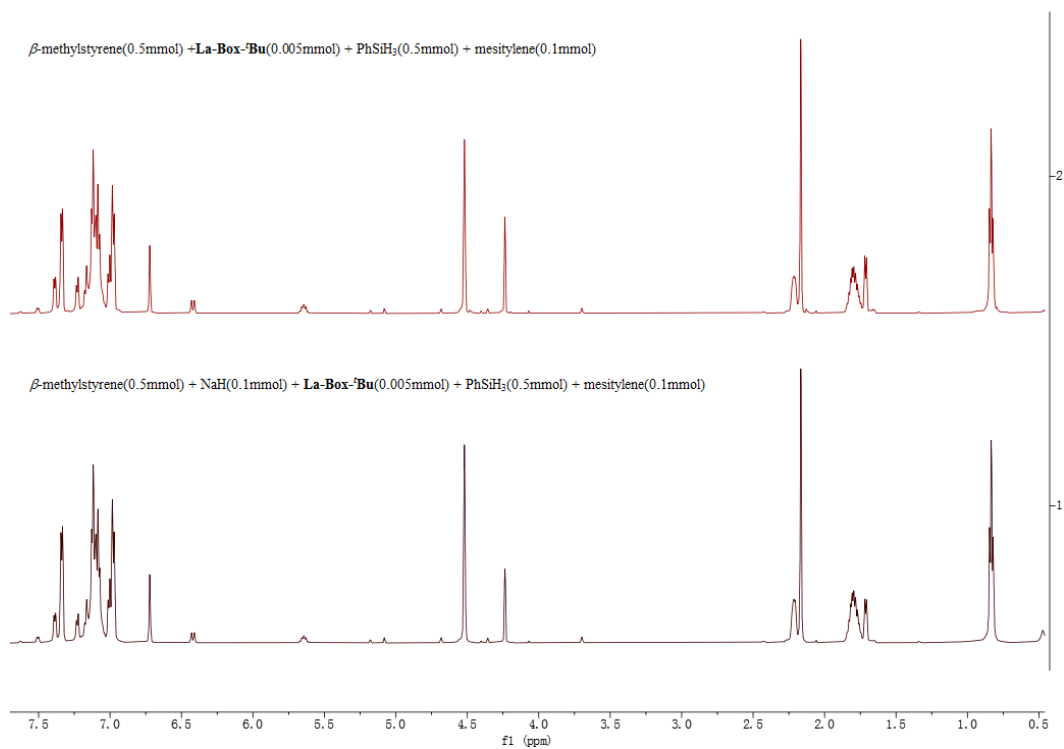

**Note:** To probe the role of NaH, we carried out the in-situ NMR studies. The results indicated that the yield of desired product increased from 82% to 90% with the addition of NaH. DFT calculation were performed to elucidate the role of NaH, However, no clear-cut explanation was obtained at the current stage.

---

## 7. X-ray crystallography data

### Determination of the structure of rare earth metals by X-ray crystallography

Crystals of **Y-Box<sup>-t</sup>Bu** for the X-ray crystal structure analysis were obtained from a concentrated solution of **Y-Box<sup>-t</sup>Bu** in pentane at  $-35$  °C. The colorless crystal in flake-shape, with approximate dimensions of  $0.109 \times 0.187 \times 0.392$  mm<sup>3</sup>, was selected and mounted for the single-crystal X-ray diffraction. The data set was collected by Bruker D8 Venture Photon II diffractometer at 170(2)K equipped with micro-focus Cu radiation source ( $K_{\alpha} = 1.54178$  Å) Mo radiation source ( $K_{\alpha} = 0.71073$  Å). Applied with face-indexed numerical absorption correction, the structure solution was solved and refinement was processed by SHELXTL (version 6.14) and OLEX 2.3 program package<sup>[7a-d]</sup>. The value observed herein is indicative of racemic twinning and was accommodated during the refinement (using the SHELXL TWIN instruction). In this case, the relatively large standard uncertainty indicates that the structural data alone should not be used to confirm absolute stereochemistry, but should be used in conjunction with the established stereochemistry of the precursor compound. The Flack parameter is provided for informational purposes only. The structure was analyzed by ADDSYM routine implemented in PLATON suite and no higher symmetry was suggested<sup>[7e]</sup>. The absolute stereochemistry of chiral complex was assigned by the corresponding chiral ligand **Box<sup>-t</sup>Bu**. **CCDC: 2202534** contains the supplementary crystallographic data which can be obtained free of charge from The Cambridge Crystallographic Data Center via [www.ccdc.cam.ac.uk/data\\_request/cif](http://www.ccdc.cam.ac.uk/data_request/cif).

Crystals of **Ce-Box<sup>-t</sup>Bu** for the X-ray crystal structure analysis were obtained from a concentrated solution of **Ce-Box<sup>-t</sup>Bu** in pentane at  $-35$  °C. The yellow crystal in block-shape, with approximate dimensions of  $0.356 \times 0.437 \times 0.610$  mm<sup>3</sup>, was selected and mounted for the single-crystal X-ray diffraction. The data set was collected by Bruker D8 Venture Photon II diffractometer at 170(2)K equipped with micro-focus Mo radiation source ( $K_{\alpha} = 0.71073$  Å). Applied with face-indexed numerical absorption correction, the structure solution was solved and refinement was processed by SHELXTL (version 6.14) and OLEX 2.3 program package<sup>[7a-d]</sup>. The structure was analyzed by ADDSYM routine implemented in PLATON suite and no higher symmetry was suggested<sup>[7e]</sup>. The absolute stereochemistry of chiral complex was assigned by the corresponding chiral ligand **Box<sup>-t</sup>Bu**. **CCDC: 2202535** contains the supplementary crystallographic data which can be obtained free of charge from The Cambridge Crystallographic Data Center via [www.ccdc.cam.ac.uk/data\\_request/cif](http://www.ccdc.cam.ac.uk/data_request/cif).

**La-Box<sup>-t</sup>Bu** for the X-ray crystal structure analysis were obtained from a concentrated solution of **La-Box<sup>-t</sup>Bu** in pentane at  $-35$  °C. The colorless crystal in flake-shape, with approximate dimensions of  $0.102 \times 0.256 \times 0.538$  mm<sup>3</sup>, was selected and mounted for the single-crystal X-ray diffraction. The data set was collected by Bruker D8 Venture Photon II diffractometer at 173(2)K equipped with micro-focus Cu radiation source ( $K_{\alpha} = 1.54178$  Å). Applied with face-indexed numerical absorption correction, the structure solution was solved and refinement was processed by SHELXTL (version 6.14) and OLEX 2.3 program package<sup>[7a-d]</sup>. The structure was analyzed by ADDSYM routine implemented in PLATON suite and no higher symmetry was suggested<sup>[7e]</sup>. The absolute stereochemistry of chiral complex was assigned by the corresponding chiral ligand **Box<sup>-t</sup>Bu**. **CCDC: 2202536** contains the supplementary crystallographic data which can be obtained free of charge from The Cambridge Crystallographic Data Center via [www.ccdc.cam.ac.uk/data\\_request/cif](http://www.ccdc.cam.ac.uk/data_request/cif).

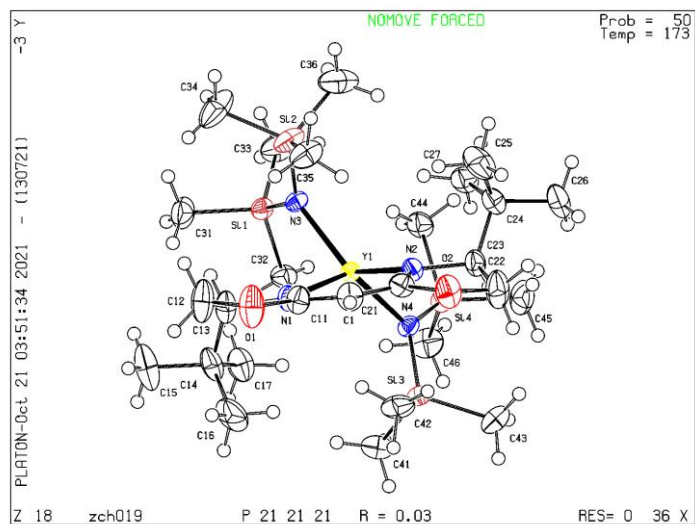

### Y-Box-<sup>t</sup>Bu

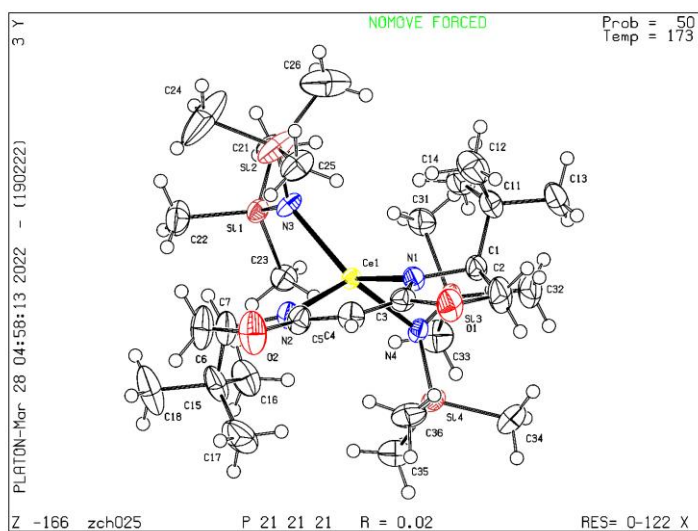

### Ce-Box-<sup>t</sup>Bu

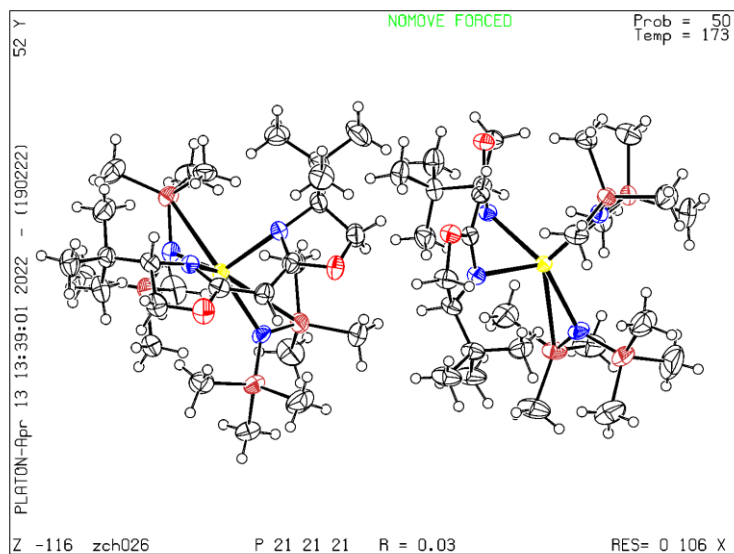

### La-Box-<sup>t</sup>Bu

## Crystallographic data for catalysts

|                                                   |                                                                                 |                                                                                 |                                                                                                |
|---------------------------------------------------|---------------------------------------------------------------------------------|---------------------------------------------------------------------------------|------------------------------------------------------------------------------------------------|
| Formula                                           | C <sub>27</sub> H <sub>61</sub> N <sub>4</sub> O <sub>2</sub> Si <sub>4</sub> Y | C <sub>27</sub> H <sub>61</sub> CeN <sub>4</sub> O <sub>2</sub> Si <sub>4</sub> | C <sub>54</sub> H <sub>122</sub> La <sub>2</sub> N <sub>8</sub> O <sub>4</sub> Si <sub>8</sub> |
| Formula mass (amu)                                | 675.06                                                                          | 726.27                                                                          | 1450.13                                                                                        |
| Space group                                       | P 21 21 21                                                                      | P 21 21 21                                                                      | P 21 21 21                                                                                     |
| <i>a</i> (Å)                                      | 11.9697(3)                                                                      | 12.0950(5)                                                                      | 10.9205(2)                                                                                     |
| <i>b</i> (Å)                                      | 17.8874(5)                                                                      | 17.8554(7)                                                                      | 17.7934(4)                                                                                     |
| <i>c</i> (Å)                                      | 17.8874(5)                                                                      | 18.0760(7)                                                                      | 40.2620(8)                                                                                     |
| $\alpha$ (deg)                                    | 90                                                                              | 90                                                                              | 90                                                                                             |
| $\beta$ (deg)                                     | 90                                                                              | 90                                                                              | 90                                                                                             |
| $\gamma$ (deg)                                    | 90                                                                              | 90                                                                              | 90                                                                                             |
| <i>V</i> (Å <sup>3</sup> )                        | 3829.81(18)                                                                     | 3903.7(3)                                                                       | 7823.4(3)                                                                                      |
| <i>Z</i>                                          | 4                                                                               | 4                                                                               | 4                                                                                              |
| $\lambda$ (Å)                                     | 1.54178                                                                         | 0.71073                                                                         | 1.54178                                                                                        |
| <i>T</i> (K)                                      | 173 K                                                                           | 173 K                                                                           | 173 K                                                                                          |
| $\rho_{\text{calcd}}$ (g cm <sup>-3</sup> )       | 1.171                                                                           | 1.236                                                                           | 1.231                                                                                          |
| $\mu$ (mm <sup>-1</sup> )                         | 3.546                                                                           | 1.315                                                                           | 9.811                                                                                          |
| Transmission factors                              | 0.449,0.807                                                                     | 0.482,0.613                                                                     | 0.031,0.341                                                                                    |
| $\theta_{\text{max}}$ (deg)                       | 68.421                                                                          | 27.513                                                                          | 68.313                                                                                         |
| No. of unique data, including $F_o^2 < 0$         | 6849                                                                            | 8757                                                                            | 12899                                                                                          |
| No. of unique data, with $F_o^2 > 2\sigma(F_o^2)$ | 6686                                                                            | 8279                                                                            | 12713                                                                                          |
| No. of variables                                  | 362                                                                             | 361                                                                             | 722                                                                                            |
| $R(F)$ for $F_o^2 > 2\sigma(F_o^2)$ <sup>a</sup>  | 0.0267                                                                          | 0.0244                                                                          | 0.0339                                                                                         |
| $R_w(F_o^2)$ <sup>b</sup>                         | 0.0687                                                                          | 0.0598                                                                          | 0.0821                                                                                         |
| Goodness of fit                                   | 1.080                                                                           | 1.059                                                                           | 1.065                                                                                          |

<sup>a</sup>  $R(F) = \sum ||F_o| - |F_c|| / \sum |F_o|$ .

<sup>b</sup>  $R_w(F_o^2) = [\sum [w(F_o^2 - F_c^2)^2] / \sum wF_o^4]^{1/2}$ ;  $w^{-1} = [\sigma^2(F_o^2) + (Ap)^2 + Bp]$ , where  $p = [\max(F_o^2, 0) + 2F_c^2] / 3$ .

## 8. The analytical and spectral characterization data of products

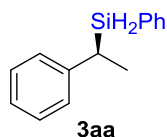

### (S)-Phenyl(1-phenylethyl)silane (3aa)

(C<sub>14</sub>H<sub>16</sub>Si) colorless oil; 104.1 mg, 98% yield, 92.5:7.5 er,  $[\alpha]_D^{28} = -17.8$  ( $c = 0.60$ , in CH<sub>2</sub>Cl<sub>2</sub>), dissolved in hexane for HPLC; **HPLC** (Daicel chiralcel **OJH**, hexane/<sup>i</sup>PrOH = 99.7/0.3, flow rate 1.0 mL/min) retention time:  $t_{\text{major}} = 7.70$  min,  $t_{\text{minor}} = 8.46$  min. **<sup>1</sup>H NMR** (400 MHz, Chloroform-*d*)  $\delta$  7.38 – 7.28 (m, 2H), 7.28 – 7.23 (m, 1H), 7.23 – 7.17 (m, 2H), 7.17 – 7.10 (m, 2H), 7.05 – 6.95 (m, 3H), 4.24 (d,  $J = 3.2$  Hz, 2H), 2.68 – 2.28 (m, 1H), 1.36 (d,  $J = 7.5$  Hz, 3H). **<sup>13</sup>C{<sup>1</sup>H} NMR** (101 MHz, Chloroform-*d*)  $\delta$  144.6, 135.7, 131.4, 129.8, 128.4, 127.9, 127.2, 125.1, 25.4, 16.4. **IR** (film, cm<sup>-1</sup>): 2955, 2924, 2135, 1600, 1492, 1116, 929, 839, 697. These spectroscopic data was correspond to the previously reported data.<sup>[8a]</sup>.



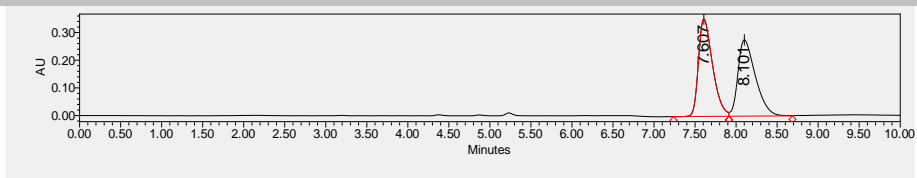

|   | Retention Time | % Area |
|---|----------------|--------|
| 1 | 7.607          | 50.69  |
| 2 | 8.101          | 49.31  |

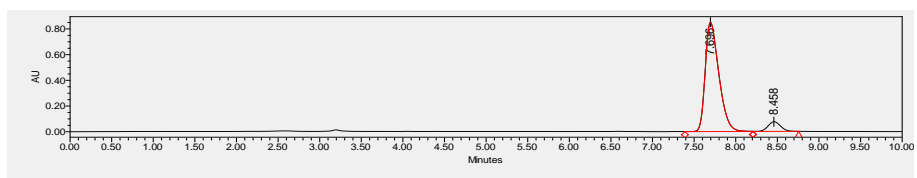

|   | Retention Time | % Area |
|---|----------------|--------|
| 1 | 7.696          | 92.46  |
| 2 | 8.458          | 7.54   |

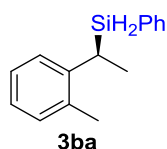

**(S)-Phenyl(1-(o-tolyl)ethyl)silane (3ba)**

(C<sub>15</sub>H<sub>18</sub>Si) colorless oil; 95 mg, 84% yield, 88.5:11.5 er, [α]<sub>D</sub><sup>28</sup> = 17.2 (c = 2.12, in CH<sub>2</sub>Cl<sub>2</sub>), dissolved in hexane for HPLC; **HPLC** (Daicel chiralcel **OJH**, hexane/*i*PrOH = 99.5/0.5, flow rate 1.0 mL/min) retention time: *t*<sub>major</sub> = 5.10 min, *t*<sub>minor</sub> = 5.64 min. **<sup>1</sup>H NMR** (400 MHz, Chloroform-*d*) δ 7.43 – 7.33 (m, 3H), 7.32 – 7.25 (m, 2H), 7.19 – 7.12 (m, 1H), 7.12 – 7.06 (m, 2H), 7.06 – 7.00 (m, 1H), 4.61 – 3.94 (m, 2H), 2.85 – 2.65 (m, 1H), 2.19 (s, 3H), 1.44 (d, *J* = 7.4 Hz, 3H). **<sup>13</sup>C{<sup>1</sup>H} NMR** (101 MHz, Chloroform-*d*) δ 142.9, 135.7, 134.9, 131.7, 130.2, 129.9, 128.0, 126.3, 126.1, 124.9, 20.9, 20.1, 20.1, 16.7. **IR** (film, cm<sup>-1</sup>): 2956, 2134, 1486, 1459, 1429, 1116, 929, 840, 734, 699. These spectroscopic data correspond to the previously reported data.<sup>[8a]</sup>

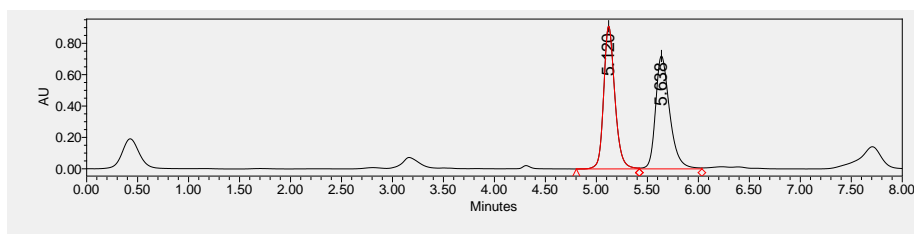

|   | Retention Time | % Area |
|---|----------------|--------|
| 1 | 5.120          | 49.88  |
| 2 | 5.638          | 50.12  |

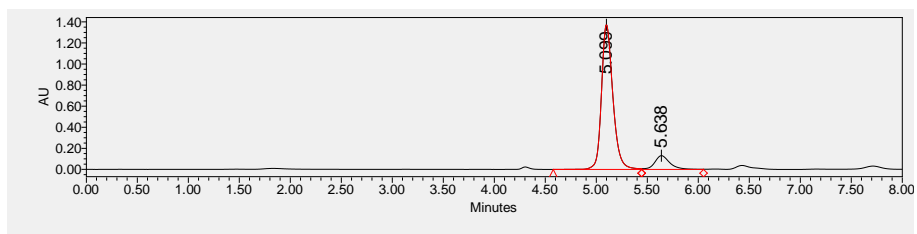

|   | Retention Time | % Area |
|---|----------------|--------|
| 1 | 5.099          | 88.66  |
| 2 | 5.638          | 11.34  |

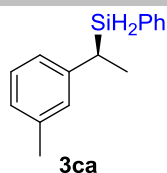

**(S)-Phenyl(1-(m-tolyl)ethyl)silane (3ca)**

(C<sub>15</sub>H<sub>18</sub>Si) colorless oil; 103.0 mg, 91% yield, 75.5:24.5 er,  $[\alpha]_D^{28} = -14.7$  ( $c = 1.83$ , in CH<sub>2</sub>Cl<sub>2</sub>), dissolved in hexane for HPLC; **HPLC** (Daicel chiralcel **OJH**, hexane/PrOH = 95/5, flow rate 1.0 mL/min) retention time:  $t_{major} = 5.10$  min,  $t_{minor} = 5.64$  min. **<sup>1</sup>H NMR** (400 MHz, Chloroform-*d*)  $\delta$  7.75 – 7.68 (m, 2H), 7.67 – 7.60 (m, 1H), 7.60 – 7.54 (m, 2H), 7.46 – 7.39 (m, 1H), 7.26 – 7.17 (m, 3H), 4.97 – 4.33 (m, 2H), 2.96 – 2.78 (m, 1H), 2.58 (s, 3H), 1.75 (d,  $J = 7.5$  Hz, 3H). **<sup>13</sup>C{<sup>1</sup>H} NMR** (101 MHz, Chloroform-*d*)  $\delta$  144.5, 137.8, 135.7, 131.5, 129.7, 128.3, 128.0, 127.8, 125.9, 124.2, 25.3, 21.5, 16.5. **IR** (film, cm<sup>-1</sup>) 2954, 2134, 1603, 1429, 1116, 929, 838, 785, 734, 699. These spectroscopic data correspond to the previously reported data.<sup>[8a]</sup>

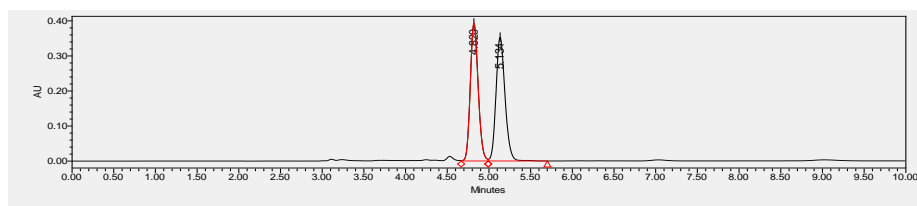

|   | Retention Time | % Area |
|---|----------------|--------|
| 1 | 4.820          | 49.29  |
| 2 | 5.134          | 50.71  |

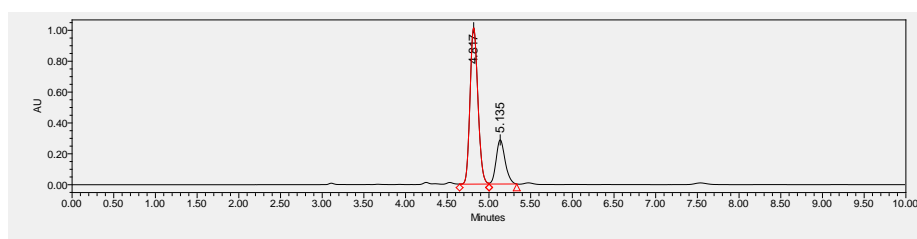

|   | Retention Time | % Area |
|---|----------------|--------|
| 1 | 4.817          | 75.65  |
| 2 | 5.135          | 24.35  |

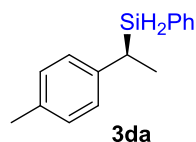

**(S)-Phenyl(1-(p-tolyl)ethyl)silane (3da)**

(C<sub>15</sub>H<sub>18</sub>Si) colorless oil; 107.5 mg, 95% yield, 84.5:15.5 er,  $[\alpha]_D^{28} = -18.9$  ( $c = 0.42$ , in CH<sub>2</sub>Cl<sub>2</sub>), dissolved in hexane for HPLC; **HPLC** (Daicel chiralcel **OJH**, hexane/PrOH = 99/1, flow rate 0.5 mL/min) retention time:  $t_{major} = 12.90$  min,  $t_{minor} = 10.98$  min. **<sup>1</sup>H NMR** (400 MHz, Chloroform-*d*)  $\delta$  7.50 – 7.44 (m, 2H), 7.45 – 7.40 (m, 1H), 7.38 – 7.32 (m, 2H), 7.16 – 7.07 (m, 2H), 7.07 – 6.99 (m, 2H), 4.76 – 3.95 (m, 2H), 2.68 – 2.55 (m, 1H), 2.35 (s, 3H), 1.48 (d,  $J = 7.5$  Hz, 3H). **<sup>13</sup>C{<sup>1</sup>H} NMR** (101 MHz, Chloroform-*d*)  $\delta$  141.5, 135.7, 134.5, 131.6, 129.8, 129.2, 127.9, 127.1, 24.9, 21.0, 16.6. **IR** (film, cm<sup>-1</sup>): 2954, 2360, 2135, 1510, 1428, 1116, 929, 842. These spectroscopic data correspond to the previously reported data.<sup>[8a]</sup>

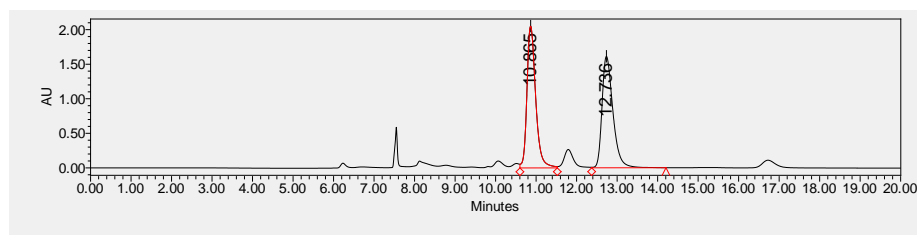

|   | Retention Time | % Area |
|---|----------------|--------|
| 1 | 10.865         | 50.38  |
| 2 | 12.736         | 49.62  |

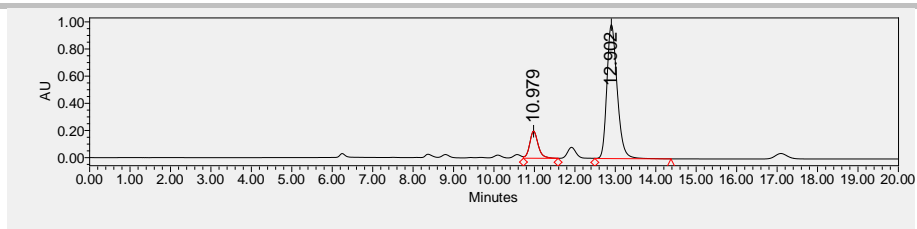

|   | Retention Time | % Area |
|---|----------------|--------|
| 1 | 10.979         | 15.30  |
| 2 | 12.902         | 84.70  |

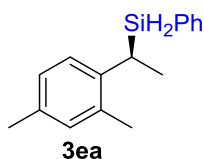

**(S)-1-(2,4-Dimethylphenyl)ethyl(phenyl)silane (3ea)**

(C<sub>16</sub>H<sub>20</sub>Si) colorless oil; 81.8 mg, 68% yield, 72:28 er, [α]<sub>D</sub><sup>28</sup> = -8.4 (c = 0.75, in CH<sub>2</sub>Cl<sub>2</sub>), dissolved in hexane for HPLC; **HPLC** (Daicel chiralcel **OJH**, hexane/<sup>i</sup>PrOH = 99.7/0.3, flow rate 1.0 mL/min) retention time: *t*<sub>major</sub> = 5.45 min, *t*<sub>minor</sub> = 6.27 min. **<sup>1</sup>H NMR** (400 MHz, Chloroform-*d*) δ 7.51 – 7.45 (m, 2H), 7.44 – 7.39 (m, 1H), 7.35 (t, *J* = 7.4 Hz, 2H), 7.08 – 6.94 (m, 3H), 4.53 – 4.09 (m, 2H), 2.76 (tt, *J* = 7.6, 4.2 Hz, 1H), 2.32 (s, 3H), 2.22 (s, 3H), 1.46 (d, *J* = 7.4 Hz, 3H). **<sup>13</sup>C{<sup>1</sup>H} NMR** (101 MHz, Chloroform-*d*) δ 139.8, 135.6, 134.7, 134.2, 131.8, 131.1, 129.8, 127.9, 127.0, 126.0, 20.9, 20.3, 20.0, 16.7. **IR** (film, cm<sup>-1</sup>) 2954, 2133, 1500, 1429, 1116, 929, 841, 733, 699, 550. These spectroscopic data correspond to the previously reported data.<sup>[8b]</sup>

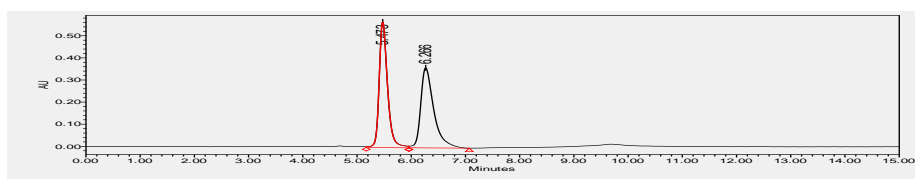

|   | Retention Time | % Area |
|---|----------------|--------|
| 1 | 5.473          | 50.00  |
| 2 | 6.266          | 50.00  |

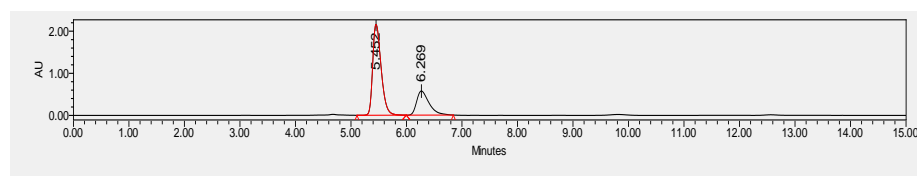

|   | Retention Time | % Area |
|---|----------------|--------|
| 1 | 5.452          | 71.82  |
| 2 | 6.269          | 28.18  |

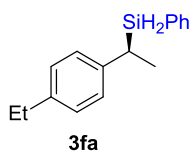

**(S)-1-(4-Ethylphenyl)ethyl(phenyl)silane (3fa)**

(C<sub>16</sub>H<sub>20</sub>Si) colorless oil; 96.2 mg, 80% yield, 81:19 er, [α]<sub>D</sub><sup>28</sup> = -15.9 (c = 0.86, in CH<sub>2</sub>Cl<sub>2</sub>), dissolved in hexane for HPLC; **HPLC** (Daicel chiralcel **OJH**, hexane/<sup>i</sup>PrOH = 99/1, flow rate 1.0 mL/min) retention time: *t*<sub>major</sub> = 6.09 min, *t*<sub>minor</sub> = 5.19 min. **<sup>1</sup>H NMR** (400 MHz, Chloroform-*d*) δ 7.55 – 7.48 (m, 2H), 7.48 – 7.42 (m, 1H), 7.43 – 7.35 (m, 2H), 7.23 – 7.14 (m, 2H), 7.15 – 7.08 (m, 2H), 4.70 – 4.07 (m, 2H), 2.78 – 2.55 (m, 3H), 1.53 (d, *J* = 7.5 Hz, 3H), 1.31 (t, *J* = 7.6 Hz, 3H). **<sup>13</sup>C{<sup>1</sup>H} NMR** (101 MHz, Chloroform-*d*) δ 141.7, 140.9, 135.7, 131.7, 129.8, 128.0, 127.9, 127.1, 28.5, 24.9, 16.6, 15.7. **GC-MS** (EI): Calcd for C<sub>16</sub>H<sub>20</sub>Si: 240.1, found: 240.1. **IR** (film, cm<sup>-1</sup>) 2962, 2134, 1510, 1428, 1117, 929, 843, 734, 699, 583.

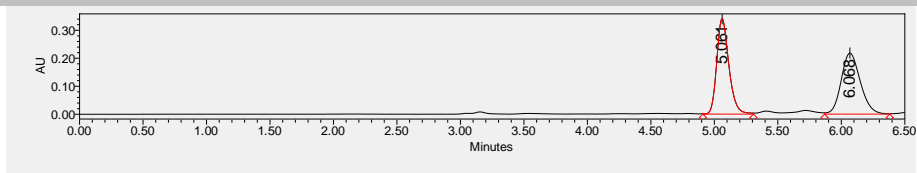

|   | Retention Time | % Area |
|---|----------------|--------|
| 1 | 5.061          | 49.80  |
| 2 | 6.068          | 50.20  |

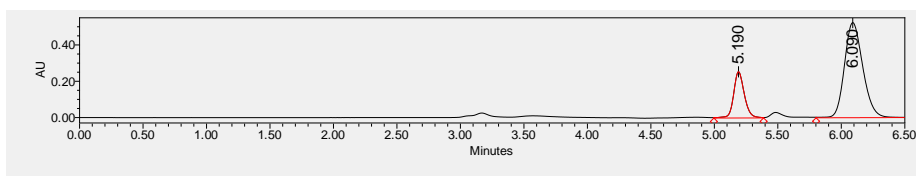

|   | Retention Time | % Area |
|---|----------------|--------|
| 1 | 5.190          | 19.11  |
| 2 | 6.090          | 80.89  |

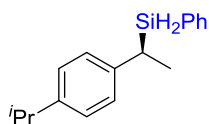

**3ga**

**(S)-1-(4-Isopropylphenyl)ethyl(phenyl)silane (3ga)**

(C<sub>17</sub>H<sub>22</sub>Si) colorless oil; 86.5 mg, 68% yield, 66:34 er, [α]<sub>D</sub><sup>28</sup> = -7.7 (c = 1.36, in CH<sub>2</sub>Cl<sub>2</sub>), dissolved in hexane for HPLC; **HPLC** (Daicel chiralcel **OJH**, hexane/<sup>t</sup>PrOH = 99.7/0.3, flow rate 1.0 mL/min) retention time: *t*<sub>major</sub> = 5.84 min, *t*<sub>minor</sub> = 5.34 min. **<sup>1</sup>H NMR** (400 MHz, Chloroform-*d*) δ 7.35 – 7.29 (m, 2H), 7.27 – 7.24 (m, 1H), 7.24 – 7.15 (m, 2H), 7.05 – 6.98 (m, 2H), 6.98 – 6.88 (m, 2H), 4.53 – 3.91 (m, 2H), 2.82 – 2.71 (m, 1H), 2.56 – 2.39 (m, 1H), 1.34 (d, *J* = 7.5 Hz, 3H), 1.14 (d, *J* = 7.0 Hz, 6H). **<sup>13</sup>C{<sup>1</sup>H} NMR** (101 MHz, Chloroform-*d*) δ 145.5, 141.8, 135.7, 131.7, 129.7, 127.9, 127.0, 126.4, 33.6, 24.8, 24.1, 16.5. **GC-MS** (EI): Calcd for C<sub>17</sub>H<sub>22</sub>Si: 254.1, found: 254.1. **IR** (film, cm<sup>-1</sup>) 2959, 2134, 1511, 1458, 1427, 1116, 929, 843, 733, 699, 557.

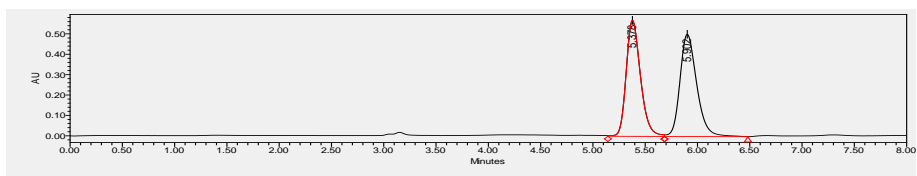

|   | Retention Time | % Area |
|---|----------------|--------|
| 1 | 5.378          | 49.52  |
| 2 | 5.902          | 50.48  |

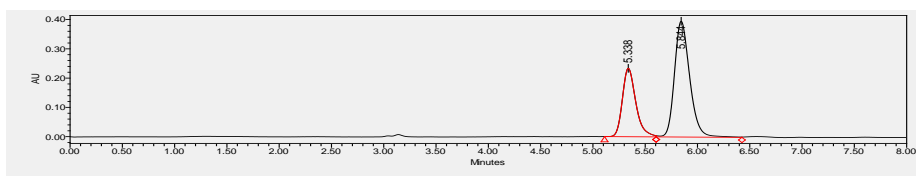

|   | Retention Time | % Area |
|---|----------------|--------|
| 1 | 5.338          | 34.14  |
| 2 | 5.844          | 65.86  |

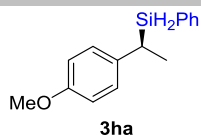

**(S)-1-(4-Methoxyphenyl)ethyl(phenyl)silane (3ha)**

(C<sub>15</sub>H<sub>18</sub>OSi) colorless oil; 64.2 mg, 53% yield, 73:27 er, [ $\alpha$ ]<sub>D</sub><sup>28</sup> = -11.5 (*c* = 0.40, in CH<sub>2</sub>Cl<sub>2</sub>), dissolved in hexane for HPLC; **HPLC** (Daicel chiralcel **OJH**, hexane/<sup>t</sup>PrOH = 99.5/0.5, flow rate 1.0 mL/min) retention time: *t*<sub>major</sub> = 12.80 min, *t*<sub>minor</sub> = 11.37 min. **<sup>1</sup>H NMR** (400 MHz, Chloroform-*d*)  $\delta$  7.36 – 7.31 (m, 2H), 7.30 – 7.26 (m, 1H), 7.25 – 7.19 (m, 2H), 6.97 – 6.88 (m, 2H), 6.78 – 6.65 (m, 2H), 4.34 – 4.08 (m, 2H), 3.69 (s, 3H), 2.54 – 2.41 (m, 1H), 1.34 (d, *J* = 7.6 Hz, 3H). **<sup>13</sup>C{<sup>1</sup>H} NMR** (101 MHz, Chloroform-*d*)  $\delta$  156.1, 135.5, 134.6, 130.5, 128.7, 126.9, 126.8, 112.8, 54.2, 23.2, 15.7. **IR** (film, cm<sup>-1</sup>): 2953, 2133, 1610, 1509, 1246, 1116, 1038, 929, 841. These spectroscopic data correspond to the previously reported data.<sup>[8a]</sup>

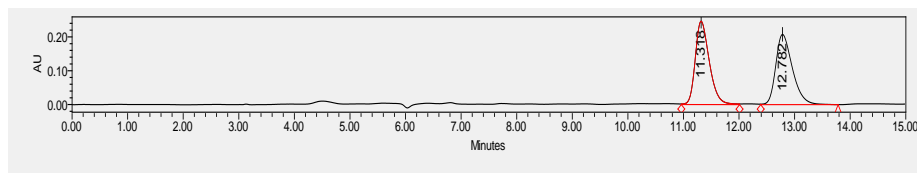

|   | Retention Time | % Area |
|---|----------------|--------|
| 1 | 11.318         | 49.97  |
| 2 | 12.782         | 50.03  |

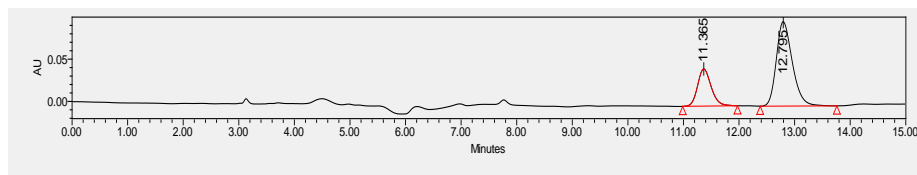

|   | Retention Time | % Area |
|---|----------------|--------|
| 1 | 11.365         | 27.22  |
| 2 | 12.795         | 72.78  |

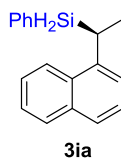

**(S)-1-(Naphthalen-1-yl)ethyl(phenyl)silane (3ia)**

(C<sub>18</sub>H<sub>18</sub>Si) colorless oil; 72.2 mg, 55% yield, 68:32 er, [ $\alpha$ ]<sub>D</sub><sup>28</sup> = 52.7 (*c* = 1.12, in CH<sub>2</sub>Cl<sub>2</sub>), dissolved in hexane for HPLC; **HPLC** (Daicel chiralcel **OJH**, hexane/<sup>t</sup>PrOH = 99.7/0.3, flow rate 1.0 mL/min) retention time: *t*<sub>major</sub> = 17.35 min, *t*<sub>minor</sub> = 11.06 min. **<sup>1</sup>H NMR** (400 MHz, Chloroform-*d*)  $\delta$  8.08 – 8.00 (m, 1H), 7.89 – 7.79 (m, 1H), 7.68 – 7.61 (m, 1H), 7.47 – 7.42 (m, 2H), 7.42 – 7.37 (m, 3H), 7.37 – 7.33 (m, 1H), 7.30 – 7.26 (m, 2H), 7.25 – 7.21 (m, 1H), 4.67 – 4.16 (m, 2H), 3.54 – 3.35 (m, 1H), 1.58 (d, *J* = 7.3 Hz, 3H). **<sup>13</sup>C{<sup>1</sup>H} NMR** (101 MHz, Chloroform-*d*)  $\delta$  141.0, 135.8, 134.0, 131.5, 131.2, 129.9, 129.0, 128.0, 125.7, 125.7, 125.6, 125.5, 123.5, 123.3, 20.1, 16.9. **IR** (film, cm<sup>-1</sup>) 3049, 2137, 1428, 1394, 1116, 928, 837, 776, 733, 699. These spectroscopic data correspond to the previously reported data.<sup>[8a]</sup>

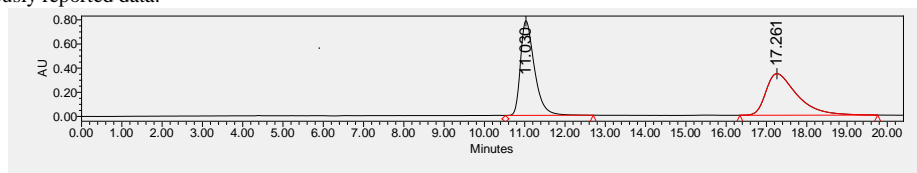

|   | Retention Time | % Area |
|---|----------------|--------|
| 1 | 11.030         | 50.49  |
| 2 | 17.261         | 49.51  |

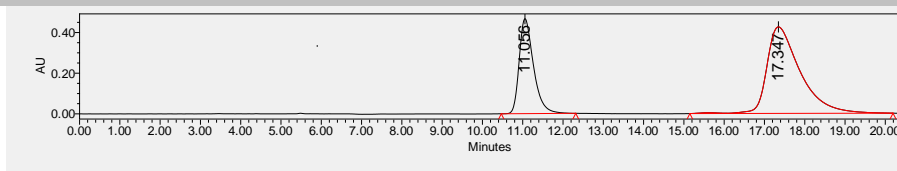

|   | Retention Time | % Area |
|---|----------------|--------|
| 1 | 11.056         | 31.97  |
| 2 | 17.347         | 68.03  |

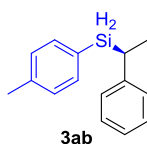

### (S)-[1-(1-Phenylethyl)(p-tolyl)silane (3ab)

(C<sub>15</sub>H<sub>18</sub>Si) colorless oil; 95.1 mg, 84% yield, 89:11 er,  $[\alpha]_D^{28} = 11.6$  ( $c = 1.88$ , in CH<sub>2</sub>Cl<sub>2</sub>), dissolved in hexane for HPLC; **HPLC** (Daicel chiralcel **OJH**, hexane/PrOH = 99/1, flow rate 1.0 mL/min) retention time:  $t_{major} = 5.72$  min,  $t_{minor} = 6.13$  min. **<sup>1</sup>H NMR** (400 MHz, Chloroform-*d*)  $\delta$  7.24 – 7.18 (m, 2H), 7.18 – 7.12 (m, 2H), 7.06 – 6.93 (m, 5H), 4.54 – 3.91 (m, 2H), 2.59 – 2.40 (m, 1H), 2.24 (s, 3H), 1.35 (d,  $J = 7.5$  Hz, 3H). **<sup>13</sup>C{<sup>1</sup>H} NMR** (101 MHz, Chloroform-*d*)  $\delta$  144.8, 139.8, 135.8, 128.8, 128.4, 127.7, 127.2, 125.0, 25.6, 21.6, 21.6, 16.5. **GC-MS** (EI): Calcd for C<sub>15</sub>H<sub>18</sub>Si: 226.1, found: 226.1 **IR** (film, cm<sup>-1</sup>) 2955, 2132, 1601, 1486, 1458, 1110, 929, 844, 796, 766.

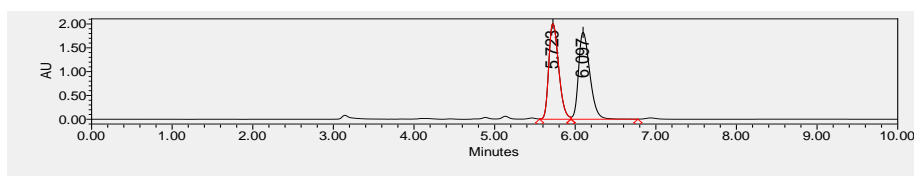

|   | Retention Time | % Area |
|---|----------------|--------|
| 1 | 5.720          | 48.53  |
| 2 | 6.097          | 51.47  |

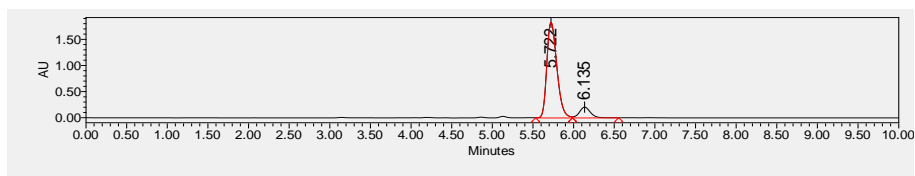

|   | Retention Time | % Area |
|---|----------------|--------|
| 1 | 5.722          | 88.86  |
| 2 | 6.135          | 11.14  |

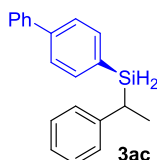

### (S)-[1,1'-Biphenyl]-4-yl(1-phenylethyl)silane (3ac)

(C<sub>20</sub>H<sub>20</sub>Si) white solid; M.p. 64 – 67 °C, 99.5 mg, 69% yield, 88:12 er  $[\alpha]_D^{28} = -24.3$  ( $c = 2.27$ , in CH<sub>2</sub>Cl<sub>2</sub>), dissolved in hexane for HPLC; **HPLC** (Daicel chiralcel **OJH**, hexane/PrOH = 99.7/0.3, flow rate 1.0 mL/min) retention time:  $t_{major} = 26.86$  min,  $t_{minor} = 31.14$  min. **<sup>1</sup>H NMR** (400 MHz, Chloroform-*d*)  $\delta$  7.61 – 7.56 (m, 2H), 7.56 – 7.51 (m, 2H), 7.49 – 7.39 (m, 4H), 7.37 – 7.31 (m, 1H), 7.29 – 7.21 (m, 2H), 7.17 – 7.07 (m, 3H), 4.71 – 3.98 (m, 2H), 2.74 – 2.56 (m, 1H), 1.48 (d,  $J = 7.4$  Hz, 3H). **<sup>13</sup>C{<sup>1</sup>H} NMR** (101 MHz, Chloroform-*d*)  $\delta$  144.6, 142.5, 140.8, 136.2, 130.1, 128.9, 128.5, 127.6, 127.2, 127.2, 126.6, 125.1, 25.5, 16.5. **GC-MS** (EI): Calcd for C<sub>20</sub>H<sub>20</sub>Si: 288.1, found: 288.1 **IR** (film, cm<sup>-1</sup>) 3024, 2955, 2134, 1597, 1486, 1450, 1384, 1117, 1007, 919, 844, 823, 757, 696, 597.

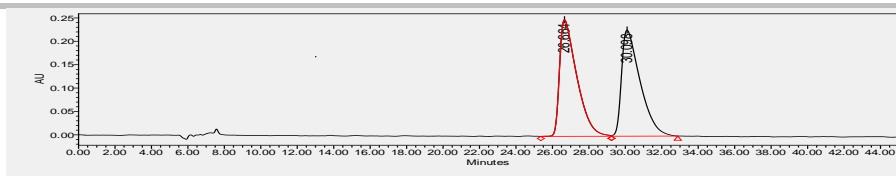

|   | Retention Time | % Area |
|---|----------------|--------|
| 1 | 26.664         | 50.41  |
| 2 | 30.098         | 49.59  |

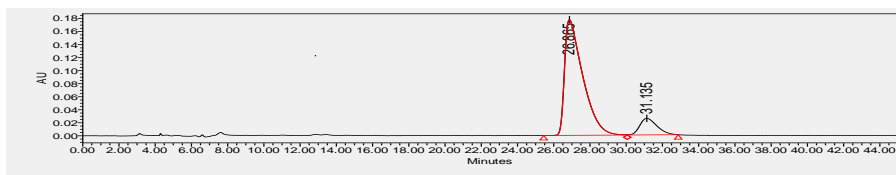

|   | Retention Time | % Area |
|---|----------------|--------|
| 1 | 26.864         | 88.11  |
| 2 | 31.139         | 11.89  |

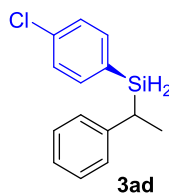

**(S)-(4-Chlorophenyl)(1-phenylethyl)silane (3ad)**

(C<sub>14</sub>H<sub>15</sub>ClSi) colorless oil; 101.2 mg, 82% yield, 93:7 er, [α]<sub>D</sub><sup>28</sup> = -21.1 (c = 2.02, in CH<sub>2</sub>Cl<sub>2</sub>), dissolved in hexane for HPLC; **HPLC** (Daicel chiralcel **OJH**, hexane/PrOH = 99/1, flow rate 1.0 mL/min) retention time: *t*<sub>major</sub> = 5.91 min, *t*<sub>minor</sub> = 6.87 min. <sup>1</sup>H NMR (400 MHz, Chloroform-*d*) δ 7.23 – 7.10 (m, 6H), 7.06 – 7.00 (m, 1H), 6.99 – 6.90 (m, 2H), 4.22 (d, *J* = 3.2 Hz, 2H), 2.60 – 2.37 (m, 1H), 1.34 (d, *J* = 7.5 Hz, 3H). <sup>13</sup>C{<sup>1</sup>H} NMR (101 MHz, Chloroform-*d*) δ 144.2, 137.1, 136.4, 129.7, 128.5, 128.2, 127.2, 125.3, 25.4, 16.3. **IR** (film, cm<sup>-1</sup>) 2955, 2137, 1578, 1484, 1451, 1380, 1088, 1013, 928, 841, 809, 763, 738, 698, 595. These spectroscopic data correspond to the previously reported data. [8a]

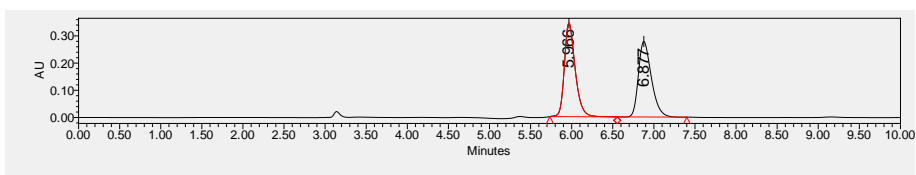

|   | Retention Time | % Area |
|---|----------------|--------|
| 1 | 5.966          | 50.84  |
| 2 | 6.877          | 49.16  |

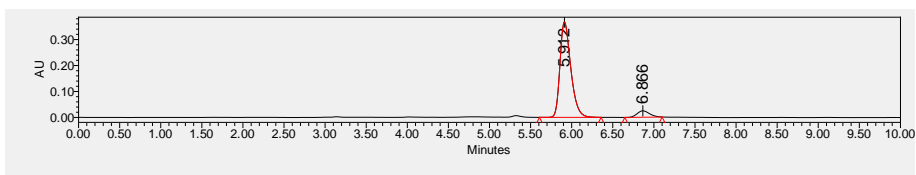

|   | Retention Time | % Area |
|---|----------------|--------|
| 1 | 5.912          | 92.90  |
| 2 | 6.866          | 7.10   |

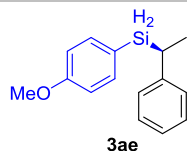

**(S)-(4-Methoxyphenyl)(1-phenylethyl)silane (3ae)**

(C<sub>15</sub>H<sub>18</sub>OSi) colorless oil; 94.5 mg, 78% yield, 89:11 er, [ $\alpha$ ]<sub>D</sub><sup>28</sup> = -21.5 (*c* = 1.45, in CH<sub>2</sub>Cl<sub>2</sub>), dissolved in hexane for HPLC; **HPLC** (Daicel chiralcel **OJH**, hexane/*i*PrOH = 99/1, flow rate 1.0 mL/min) retention time: *t*<sub>major</sub> = 9.71 min, *t*<sub>minor</sub> = 11.91 min. **<sup>1</sup>H NMR** (400 MHz, Chloroform-*d*)  $\delta$  7.25 – 7.20 (m, 2H), 7.20 – 7.12 (m, 2H), 7.06 – 6.96 (m, 3H), 6.82 – 6.73 (m, 2H), 4.29 – 4.11 (m, 2H), 3.70 (s, 3H), 2.57 – 2.41 (m, 1H), 1.36 (d, *J* = 7.5 Hz, 3H). **<sup>13</sup>C{<sup>1</sup>H} NMR** (101 MHz, Chloroform-*d*)  $\delta$  161.1, 144.8, 137.3, 128.4, 127.2, 125.0, 122.0, 113.7, 55.1, 25.7, 16.4. **IR** (film, cm<sup>-1</sup>) 2955, 2131, 1594, 1501, 1454, 1280, 1248, 1182, 1115, 1032, 929, 845, 824, 699. These spectroscopic data correspond to the previously reported data.<sup>[8a]</sup>

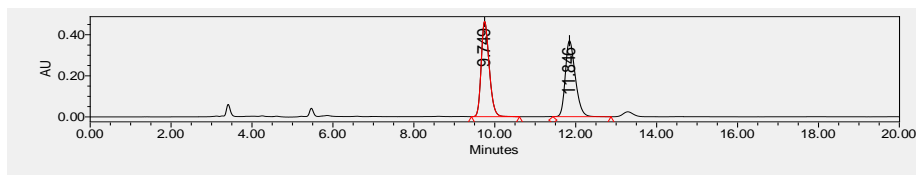

|   | Retention Time | % Area |
|---|----------------|--------|
| 1 | 9.749          | 50.12  |
| 2 | 11.846         | 49.88  |

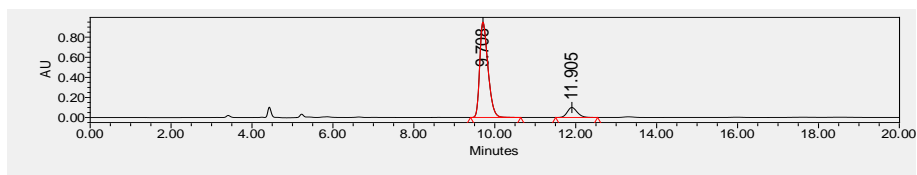

|   | Retention Time | % Area |
|---|----------------|--------|
| 1 | 9.708          | 88.79  |
| 2 | 11.905         | 11.21  |

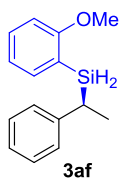

**(S)-(2-Methoxyphenyl)(1-phenylethyl)silane (3af)**

(C<sub>15</sub>H<sub>18</sub>OSi) colorless oil; 24.2 mg, 20% yield, 79:21 er [ $\alpha$ ]<sub>D</sub><sup>28</sup> = -53.6 (*c* = 0.06, in CH<sub>2</sub>Cl<sub>2</sub>), dissolved in hexane for HPLC; **HPLC** (Daicel chiralcel **OJH**, hexane/*i*PrOH = 99/1, flow rate 1.0 mL/min) retention time: *t*<sub>major</sub> = 9.44 min, *t*<sub>minor</sub> = 10.67 min. **<sup>1</sup>H NMR** (400 MHz, Chloroform-*d*)  $\delta$  7.45 – 7.31 (m, 2H), 7.26 – 7.19 (m, 2H), 7.18 – 7.04 (m, 3H), 6.95 – 6.85 (m, 1H), 6.86 – 6.77 (m, 1H), 4.52 – 3.97 (m, 2H), 3.76 (s, 3H), 2.81 – 2.66 (m, 1H), 1.42 (d, *J* = 7.5 Hz, 3H). **<sup>13</sup>C{<sup>1</sup>H} NMR** (101 MHz, Chloroform-*d*)  $\delta$  164.2, 145.6, 137.8, 132.0, 128.3, 127.0, 124.8, 120.7, 120.4, 109.4, 55.3, 24.9, 16.7. **GC-MS** (EI): Calcd for C<sub>15</sub>H<sub>18</sub>OSi: 242.1, found: 242.1 **IR** (film, cm<sup>-1</sup>) 2955, 2360, 2134, 1588, 1460, 1429, 1272, 1240, 1085, 1023, 935, 840, 758, 698.

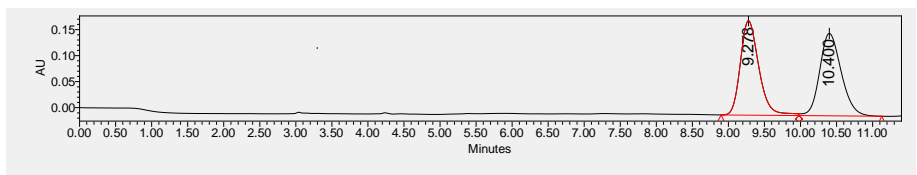

|   | Retention Time | % Area |
|---|----------------|--------|
| 1 | 9.278          | 49.55  |
| 2 | 10.400         | 50.45  |

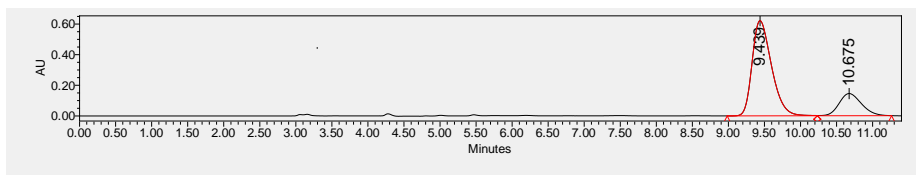



|   | Retention Time | % Area |
|---|----------------|--------|
| 1 | 9.439          | 78.73  |
| 2 | 10.675         | 21.27  |

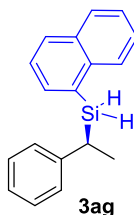

**(S)-Naphthalen-1-yl(1-phenylethyl)silane (3ag)**

(C<sub>18</sub>H<sub>18</sub>Si) colorless oil; 68.2 mg, 52% yield, 80.5:19.5 er, [α]<sub>D</sub><sup>28</sup> = -63.9 (*c* = 0.58, in CH<sub>2</sub>Cl<sub>2</sub>), dissolved in hexane for HPLC; **HPLC** (Daicel chiralcel **OJH**, hexane/<sup>n</sup>PrOH = 98/2, flow rate 1.0 mL/min) retention time: *t*<sub>major</sub> = 8.65 min, *t*<sub>minor</sub> = 12.10 min. **<sup>1</sup>H NMR** (400 MHz, Chloroform-*d*) δ 7.91 – 7.78 (m, 3H), 7.69 – 7.64 (m, 1H), 7.50 – 7.27 (m, 3H), 7.24 – 7.13 (m, 2H), 7.13 – 7.03 (m, 3H), 5.00 – 4.27 (m, 2H), 2.90 – 2.64 (m, 1H), 1.44 (d, *J* = 7.5 Hz, 3H). **<sup>13</sup>C{<sup>1</sup>H} NMR** (101 MHz, Chloroform-*d*) δ 144.9, 137.3, 136.7, 133.2, 130.8, 130.4, 128.9, 128.5, 128.0, 127.1, 126.2, 125.8, 125.2, 125.1, 25.7, 16.7. **GC-MS** (EI): Calcd for C<sub>18</sub>H<sub>18</sub>Si: 262.1, found: 262.1. **IR** (film, cm<sup>-1</sup>) 3055, 2136, 1502, 1452, 1444, 985, 937, 840, 795, 777, 698, 511.

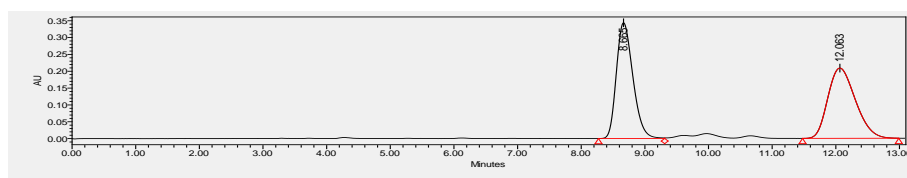

|   | Retention Time | % Area |
|---|----------------|--------|
| 1 | 8.665          | 49.76  |
| 2 | 12.063         | 50.24  |

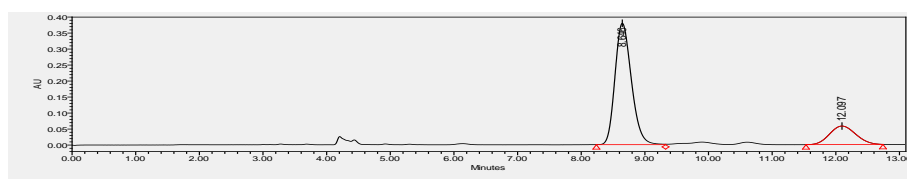

|   | Retention Time | % Area |
|---|----------------|--------|
| 1 | 8.646          | 80.50  |
| 2 | 12.097         | 19.50  |

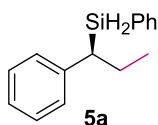

**(S)-Phenyl(1-phenylpropyl)silane (5a)**

(C<sub>15</sub>H<sub>18</sub>Si) colorless oil (*E* olefin); 92.8 mg, 82% yield, 88.5:11.5 er, (C<sub>15</sub>H<sub>18</sub>Si) colorless oil (*Z* olefin); 88.3 mg, 78% yield, 88.5:11.5 er (C<sub>15</sub>H<sub>18</sub>Si) colorless oil (olefin *E:Z* = 1:1.3); 97.3 mg, 86% yield, 88.5:11.5 er [α]<sub>D</sub><sup>28</sup> = -61 (*c* = 0.41, in CH<sub>2</sub>Cl<sub>2</sub>), dissolved in hexane for HPLC; **HPLC** (Daicel chiralcel **OJH**, hexane/<sup>n</sup>PrOH = 95/5, flow rate 1 mL/min) retention time: *t*<sub>major</sub> = 4.85 min, *t*<sub>minor</sub> = 5.51 min. **<sup>1</sup>H NMR** (400 MHz, Chloroform-*d*) δ 7.21 – 7.12 (m, 3H), 7.12 – 6.99 (m, 4H), 6.94 – 6.88 (m, 1H), 6.88 – 6.81 (m, 2H), 4.44 – 3.86 (m, 2H), 2.28 – 2.02 (m, 1H), 1.92 – 1.49 (m, 2H), 0.71 (t, *J* = 7.3 Hz, 3H). **<sup>13</sup>C{<sup>1</sup>H} NMR** (101 MHz, Chloroform-*d*) δ 142.9, 135.8, 131.6, 129.8, 128.4, 128.0, 127.9, 125.1, 34.5, 24.7, 14.0. **IR** (film, cm<sup>-1</sup>) 3066, 2961, 2926, 2867, 2362, 2135, 1599, 1490, 1451, 1428, 1377, 1116, 1058, 930, 896, 850, 796, 735, 698, 604, 509. These spectroscopic data correspond to the previously reported data.<sup>[7c]</sup>

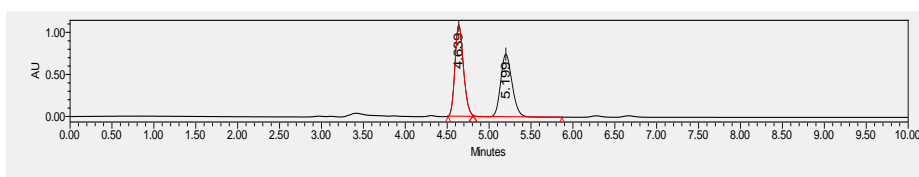

|   | Retention Time | % Area |
|---|----------------|--------|
| 1 | 4.639          | 50.11  |
| 2 | 5.199          | 49.89  |

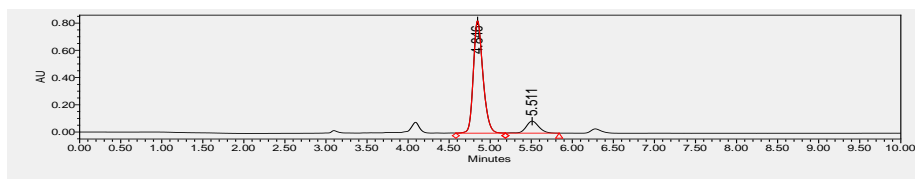

|   | Retention Time | % Area |
|---|----------------|--------|
| 1 | 4.846          | 88.50  |
| 2 | 5.511          | 11.50  |

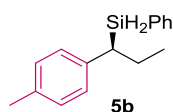

**(S)-Phenyl(1-(p-tolyl)propyl)silane (5b)**

(C<sub>16</sub>H<sub>20</sub>Si) (*E* olefin) colorless oil; 104.6 mg, 87% yield, 78.5:21.5 er,  $[\alpha]_D^{28} = -36$  ( $c = 0.30$ , in CH<sub>2</sub>Cl<sub>2</sub>), dissolved in hexane for HPLC; **HPLC** (Daicel chiralcel **OJH**, hexane/*i*-PrOH = 99/1, flow rate 1 mL/min) retention time:  $t_{major} = 4.91$  min,  $t_{minor} = 5.68$  min. **<sup>1</sup>H NMR** (400 MHz, Chloroform-*d*)  $\delta$  7.42 – 7.37 (m, 2H), 7.37 – 7.31 (m, 1H), 7.30 – 7.23 (m, 2H), 7.07 – 6.99 (m, 2H), 6.97 – 6.89 (m, 2H), 4.67 – 3.97 (m, 2H), 2.47 – 2.10 (m, 4H), 1.96 – 1.71 (m, 2H), 0.88 (t,  $J = 7.3$  Hz, 3H). **<sup>13</sup>C{<sup>1</sup>H} NMR** (101 MHz, Chloroform-*d*)  $\delta$  139.7, 135.8, 134.5, 131.8, 129.7, 129.2, 127.9, 33.9, 24.8, 21.1, 14.0. **GC-MS** (EI): Calcd for C<sub>16</sub>H<sub>20</sub>Si: 240.1, found: 240.1. **IR** (film, cm<sup>-1</sup>) 3049, 3018, 2961, 2867, 2359, 2134, 1510, 1454, 1428, 1376, 1116, 1055, 930, 856, 837, 732, 699, 672, 575, 517.

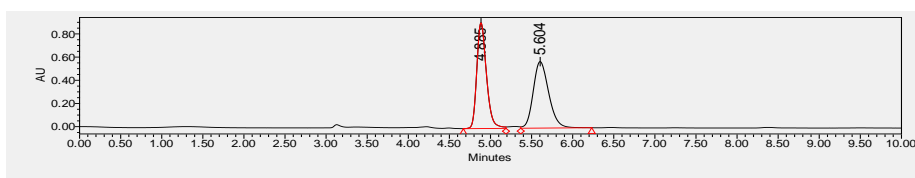

|   | Retention Time | % Area |
|---|----------------|--------|
| 1 | 4.885          | 49.68  |
| 2 | 5.604          | 50.32  |

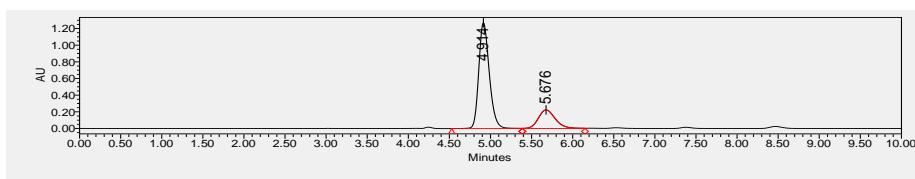

|   | Retention Time | % Area |
|---|----------------|--------|
| 1 | 4.914          | 78.49  |
| 2 | 5.676          | 21.51  |

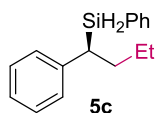

**(S)-phenyl(1-phenylbutyl)silane (5c)**

(C<sub>16</sub>H<sub>20</sub>Si) colorless oil(olefin *E:Z* =1:4.8); 97.6 mg, 81% yield, 90.5:9.5 er,  $[\alpha]_D^{26} = -26$  ( $c = 1.95$ , in CH<sub>2</sub>Cl<sub>2</sub>), dissolved in hexane for HPLC; **HPLC** (Daicel chiralcel **OJH**, hexane/*i*-PrOH = 95/5, flow rate 1 mL/min) retention time:  $t_{major} = 3.77$  min,  $t_{minor} = 4.02$  min. **<sup>1</sup>H NMR** (400 MHz, Chloroform-*d*)  $\delta$  7.39 – 7.31 (m, 3H), 7.30 – 7.17 (m, 4H), 7.12 – 7.06 (m, 1H), 7.06 – 6.98 (m, 2H), 4.72 – 3.99 (m, 2H), 2.56 – 2.37 (m, 1H), 2.01 – 1.70 (m, 2H), 1.40 – 1.13 (m, 2H), 0.84 (t,  $J = 7.3$  Hz, 3H). **<sup>13</sup>C{<sup>1</sup>H} NMR** (101 MHz, Chloroform-*d*)  $\delta$  143.1, 135.8, 131.6, 129.8, 128.5, 128.0, 127.9, 125.1, 33.7, 32.1, 22.2, 14.0. **IR** (film, cm<sup>-1</sup>) 3068, 3022, 2956, 2926, 2870, 2360, 2133, 1599, 1491, 1451, 1429, 1378, 1116, 1074, 929, 886, 836, 733, 697, 606, 510. These spectroscopic data correspond to the previously reported data.<sup>[7c]</sup>

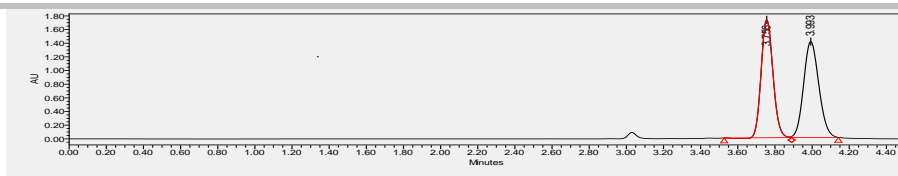

|   | Retention Time | % Area |
|---|----------------|--------|
| 1 | 3.756          | 49.16  |
| 2 | 3.993          | 50.84  |

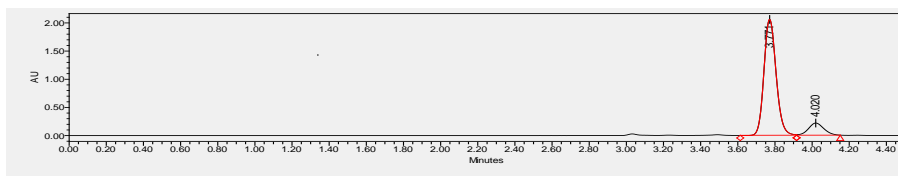

|   | Retention Time | % Area |
|---|----------------|--------|
| 1 | 3.771          | 90.46  |
| 2 | 4.020          | 9.54   |

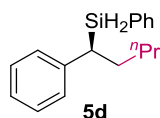

**(S)-phenyl(1-phenylpentyl)silane (5d)**

(C<sub>17</sub>H<sub>22</sub>Si) colorless oil (olefin *E:Z* = 1:4.3); 98.0 mg, 77% yield, 91.5:8.5 er, [α]<sub>D</sub><sup>25</sup> = -27 (c = 1.48, in CH<sub>2</sub>Cl<sub>2</sub>), dissolved in hexane for HPLC; **HPLC** (Daicel chiralcel **IJ**, hexane/*i*-PrOH = 99/1, flow rate 1 mL/min) retention time: *t*<sub>major</sub> = 3.93 min, *t*<sub>minor</sub> = 4.13 min. **<sup>1</sup>H NMR** (400 MHz, Chloroform-*d*) δ 7.40 – 7.30 (m, 3H), 7.30 – 7.17 (m, 4H), 7.12 – 7.06 (m, 1H), 7.06 – 6.98 (m, 2H), 4.64 – 4.01 (m, 2H), 2.51 – 2.37 (m, 1H), 1.95 – 1.73 (m, 2H), 1.34 – 1.14 (m, 4H), 0.81 (t, *J* = 5.8 Hz, 3H). **<sup>13</sup>C{<sup>1</sup>H} NMR** (101 MHz, Chloroform-*d*) δ 143.1, 135.8, 131.6, 129.8, 128.5, 128.0, 127.9, 125.1, 32.4, 31.4, 31.2, 22.6, 14.0. **IR** (film, cm<sup>-1</sup>) 3066, 3023, 2957, 2925, 2856, 2360, 2133, 1598, 1491, 1452, 1429, 1116, 1084, 929, 842, 734, 698, 603, 510. These spectroscopic data correspond to the previously reported data.<sup>[7c]</sup>

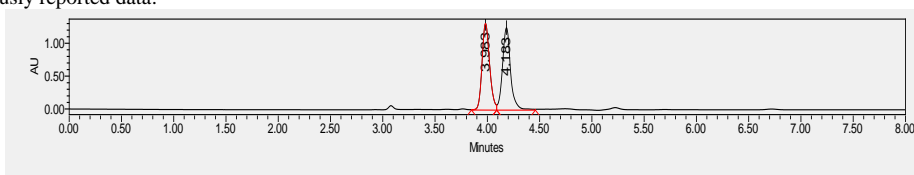

|   | Retention Time | % Area |
|---|----------------|--------|
| 1 | 3.983          | 49.46  |
| 2 | 4.183          | 50.54  |

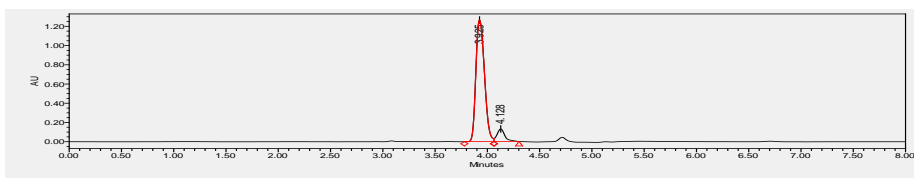

|   | Retention Time | % Area |
|---|----------------|--------|
| 1 | 3.925          | 91.44  |
| 2 | 4.128          | 8.56   |

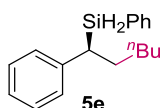

**(S)-phenyl(1-phenylhexyl)silane (5e)**

(C<sub>18</sub>H<sub>24</sub>Si) colorless oil (olefin *E:Z* = 1:5.8); 110.1 mg, 82% yield, 87.9:12.1 er, [α]<sub>D</sub><sup>25</sup> = -17.5 (c = 0.45, in CH<sub>2</sub>Cl<sub>2</sub>), dissolved in hexane for HPLC; **HPLC** (Daicel chiralcel **OJH**, hexane/*i*-PrOH = 97/3, flow rate 0.5 mL/min) retention time: *t*<sub>major</sub> = 7.94 min, *t*<sub>minor</sub> = 8.30 min. **<sup>1</sup>H NMR** (400 MHz, Chloroform-*d*)

$\delta$ 7.40 – 7.29 (m, 3H), 7.30 – 7.16 (m, 4H), 7.13 – 7.06 (m, 1H), 7.07 – 6.98 (m, 2H), 4.62 – 4.05 (m, 2H), 2.51 – 2.38 (m, 1H), 1.92 – 1.73 (m, 2H), 1.35 – 1.13 (m, 6H), 0.82 (t, 3H).  $^{13}\text{C}\{^1\text{H}\}$  NMR (101 MHz, Chloroform-*d*)  $\delta$ 143.2, 135.8, 131.6, 129.8, 128.5, 128.0, 127.9, 125.1, 32.4, 31.8, 31.4, 28.8, 22.6, 14.2. IR (film,  $\text{cm}^{-1}$ ) 3023, 2956, 2925, 2855, 2134, 1492, 1453, 1429, 1116, 930, 838, 734, 698, 603, 511. These spectroscopic data correspond to the previously reported data.<sup>[7c]</sup>

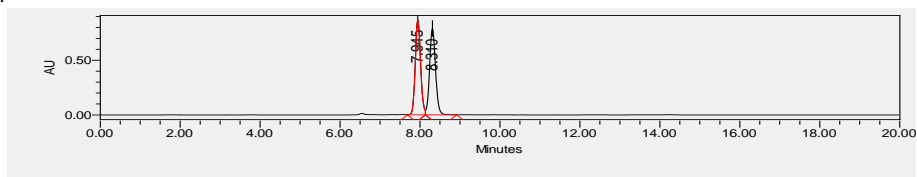

|   | Retention Time | % Area |
|---|----------------|--------|
| 1 | 7.945          | 49.78  |
| 2 | 8.310          | 50.22  |

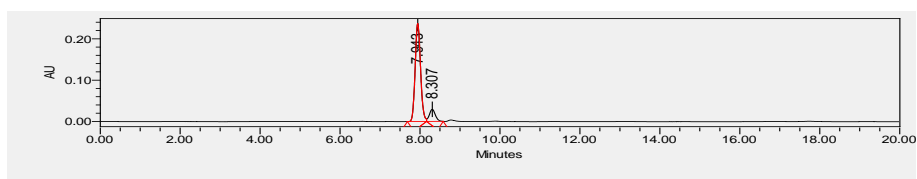

|   | Retention Time | % Area |
|---|----------------|--------|
| 1 | 7.943          | 87.91  |
| 2 | 8.307          | 12.09  |

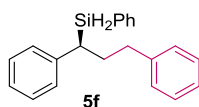

#### (S)-(1,3-diphenylpropyl)(phenyl)silane (5f)

( $\text{C}_{21}\text{H}_{22}\text{Si}$ ) colorless oil (olefin *E:Z*=1:1.6); 130.0 mg, 86% yield, 85.5:14.5 or  $[\alpha]_{\text{D}}^{25} = -66.7$  ( $c = 0.05$ , in  $\text{CH}_2\text{Cl}_2$ ), dissolved in hexane for HPLC; HPLC (Daicel chiralcel OJH, hexane/PrOH = 95/5, flow rate 1 mL/min) retention time:  $t_{\text{major}} = 10.57$  min,  $t_{\text{minor}} = 16.20$  min.  $^1\text{H}$  NMR (400 MHz, Chloroform-*d*)  $\delta$ 7.37 – 7.29 (m, 3H), 7.29 – 7.18 (m, 6H), 7.17 – 7.10 (m, 2H), 7.09 – 7.02 (m, 4H), 4.66 – 3.98 (m, 2H), 2.70 – 2.58 (m, 1H), 2.54 – 2.41 (m, 2H), 2.28 – 2.04 (m, 2H).  $^{13}\text{C}\{^1\text{H}\}$  NMR (101 MHz, Chloroform-*d*)  $\delta$ 142.5, 142.1, 135.8, 131.2, 129.9, 128.7, 128.6, 128.4, 128.1, 128.0, 125.9, 125.3, 35.1, 33.2, 31.8. IR (film,  $\text{cm}^{-1}$ ) 3024, 2923, 2362, 2136, 1494, 1452, 1117, 930, 839, 736, 698, 605. These spectroscopic data correspond to the previously reported data.<sup>[7c]</sup>

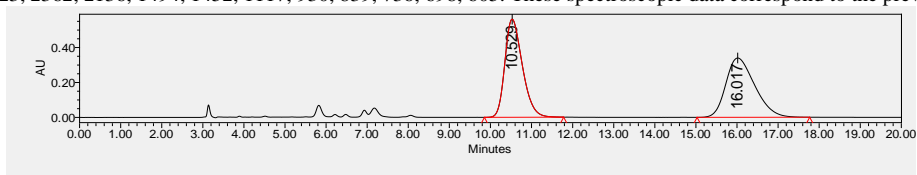

|   | Retention Time | % Area |
|---|----------------|--------|
| 1 | 10.529         | 49.98  |
| 2 | 16.017         | 50.02  |

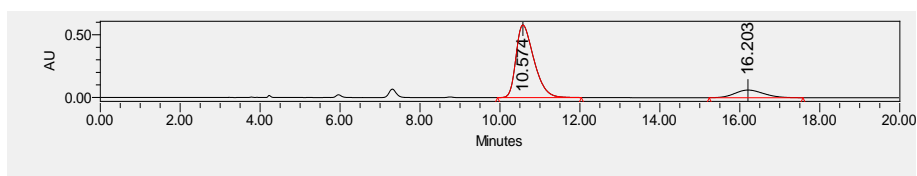

|   | Retention Time | % Area |
|---|----------------|--------|
| 1 | 10.574         | 85.50  |
| 2 | 16.203         | 14.50  |

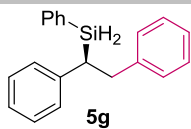

**(S)-Phenyl(1-(p-tolyl)propyl)silane (3ha)**

(C<sub>16</sub>H<sub>20</sub>Si) colorless oil (*E* olefin); 102.4 mg, 71% yield, 78.5:21.5 er,  $[\alpha]_D^{28} = 8.8$  ( $c = 0.80$ , in CH<sub>2</sub>Cl<sub>2</sub>), dissolved in hexane for HPLC; **HPLC** (Daicel chiralcel **OJH**, hexane/*i*-PrOH = 99/1, flow rate 1 mL/min) retention time:  $t_{major} = 10.13$  min,  $t_{minor} = 8.02$  min. **<sup>1</sup>H NMR** (400 MHz, Chloroform-*d*)  $\delta$  7.38 – 7.30 (m, 3H), 7.30 – 7.23 (m, 2H), 7.22 – 7.12 (m, 4H), 7.12 – 7.01 (m, 6H), 4.76 – 3.95 (m, 2H), 3.15 (d,  $J = 7.9$  Hz, 2H), 2.87 – 2.75 (m, 1H). **<sup>13</sup>C{<sup>1</sup>H} NMR** (101 MHz, Chloroform-*d*)  $\delta$  142.3, 141.2, 135.9, 131.1, 129.9, 128.8, 128.5, 128.3, 128.2, 128.0, 126.0, 125.4, 37.8, 34.3. **GC-MS** (EI): Calcd for C<sub>16</sub>H<sub>20</sub>Si: 288.1, found: 288.1. **IR** (film, cm<sup>-1</sup>) 3024, 2138, 1599, 1493, 1451, 1429, 1117, 929, 832, 735, 698, 507.

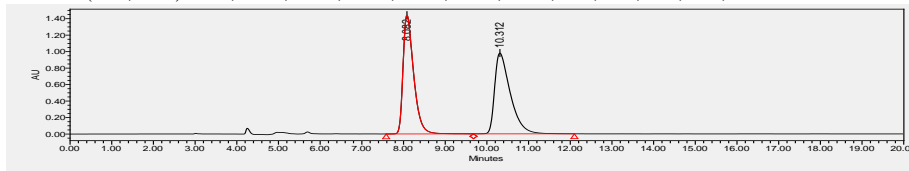

|   | Retention Time | % Area |
|---|----------------|--------|
| 1 | 8.082          | 49.89  |
| 2 | 10.312         | 50.11  |

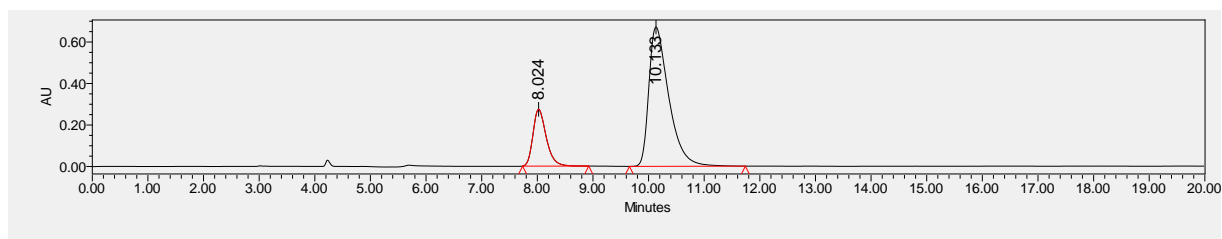

|   | Retention Time | % Area |
|---|----------------|--------|
| 1 | 8.024          | 21.31  |
| 2 | 10.133         | 78.69  |

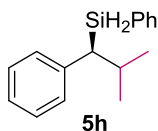

**(S)-2-Methyl-1-phenylpropyl(phenyl)silane (5h)**

(C<sub>16</sub>H<sub>20</sub>Si) colorless oil; 31.2 mg, 26% yield, 83:17 er,  $[\alpha]_D^{28} = -13$  ( $c = 1.80$ , in CH<sub>2</sub>Cl<sub>2</sub>), dissolved in hexane for HPLC; **HPLC** (Daicel chiralcel **OJH**, hexane/*i*-PrOH = 90/10, flow rate 1 mL/min) retention time:  $t_{major} = 4.23$  min,  $t_{minor} = 4.59$  min. **<sup>1</sup>H NMR** (400 MHz, Chloroform-*d*)  $\delta$  7.3 – 7.3 (m, 3H), 7.3 – 7.1 (m, 4H), 7.1 – 7.1 (m, 1H), 7.0 – 6.9 (m, 2H), 4.8 – 4.1 (m, 2H), 2.3 – 2.1 (m, 2H), 1.1 (d,  $J = 6.1$  Hz, 3H), 0.8 (d,  $J = 6.0$  Hz, 3H). **<sup>13</sup>C{<sup>1</sup>H} NMR** (101 MHz, Chloroform-*d*)  $\delta$  142.7, 135.8, 131.9, 129.6, 129.0, 128.3, 127.8, 125.2, 41.6, 31.0, 23.4, 22.8. **GC-MS** (EI): Calcd for C<sub>16</sub>H<sub>20</sub>Si: 240.1, found: 240.1. **IR** (film, cm<sup>-1</sup>) 3067, 3023, 2957, 2868, 2360, 2137, 1597, 1489, 1451, 1429, 1384, 1116, 1078, 936, 856, 824, 737, 699, 620, 510.

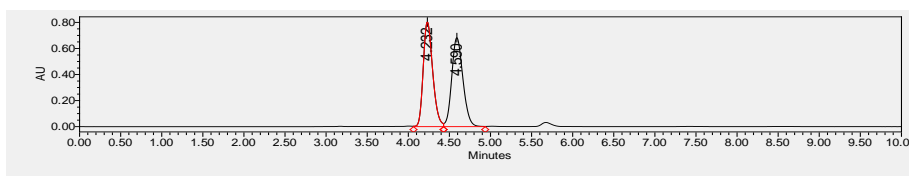

|   | Retention Time | % Area |
|---|----------------|--------|
| 1 | 4.232          | 49.70  |
| 2 | 4.590          | 50.30  |

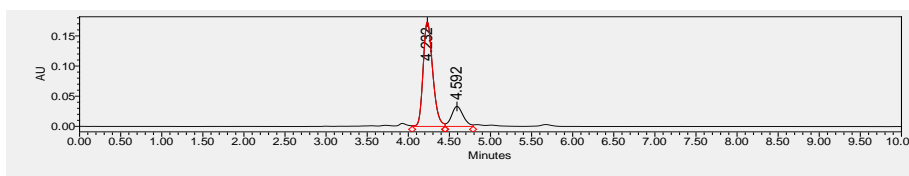

|   | Retention Time | % Area |
|---|----------------|--------|
| 1 | 4.231          | 82.75  |
| 2 | 4.592          | 17.25  |

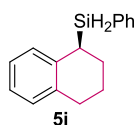

**(S)-Phenyl(1,2,3,4-tetrahydronaphthalen-1-yl)silane (5i)**

(C<sub>16</sub>H<sub>18</sub>Si) colorless oil; 85.0 mg, 71% yield, 61.5:38.5 er, [α]<sub>D</sub><sup>28</sup> = 4.5 (c = 0.33, in CH<sub>2</sub>Cl<sub>2</sub>), dissolved in hexane for HPLC; **HPLC** (Daicel chiralcel **OJH**, hexane/<sup>i</sup>PrOH = 99/1, flow rate 0.5 mL/min) retention time: *t*<sub>major</sub> = 12.01 min, *t*<sub>minor</sub> = 10.53 min. <sup>1</sup>H NMR (400 MHz, Chloroform-*d*) δ 7.54 – 7.44 (m, 2H), 7.41 – 7.35 (m, 1H), 7.35 – 7.26 (m, 2H), 7.12 – 6.89 (m, 4H), 4.63 – 4.19 (m, 2H), 2.86 – 2.79 (m, 1H), 2.78 – 2.63 (m, 2H), 2.07 – 1.95 (m, 1H), 1.94 – 1.81 (m, 2H), 1.77 – 1.67 (m, 1H). <sup>13</sup>C{<sup>1</sup>H} NMR (101 MHz, Chloroform-*d*) δ 137.8, 136.5, 135.7, 132.0, 129.8, 129.5, 128.8, 128.0, 125.5, 124.7, 29.5, 25.3, 25.3, 21.5. **GC-MS** (EI): Calcd for C<sub>16</sub>H<sub>18</sub>Si: 238.1, found: 238.1. **IR** (film, cm<sup>-1</sup>) 2929, 2136, 1489, 1116, 931, 867, 838, 741, 699.

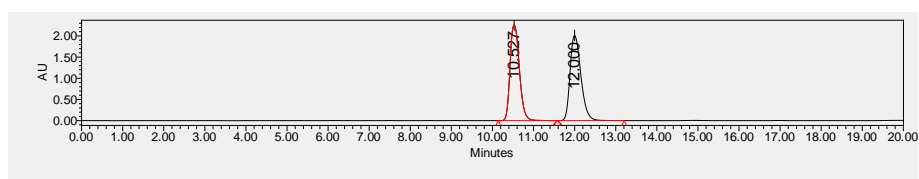

|   | Retention Time | % Area |
|---|----------------|--------|
| 1 | 10.527         | 49.07  |
| 2 | 12.000         | 50.93  |

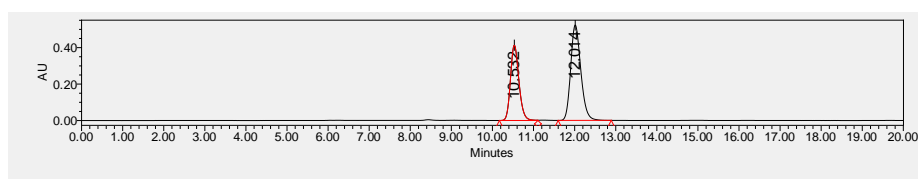

|   | Retention Time | % Area |
|---|----------------|--------|
| 1 | 10.532         | 38.35  |
| 2 | 12.014         | 61.65  |

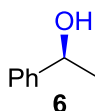

**(S)-1-Phenylethan-1-ol (6)**

(C<sub>8</sub>H<sub>10</sub>O) colorless oil; 61 mg, 99% yield, 91.5:8.5 er, [α]<sub>D</sub><sup>28</sup> = -38 (c = 0.68, in CH<sub>2</sub>Cl<sub>2</sub>), dissolved in hexane for HPLC; **HPLC** (Daicel chiralcel **ODH**, hexane/<sup>i</sup>PrOH = 95/5, flow rate 1 mL/min) retention time: *t*<sub>major</sub> = 10.01 min, *t*<sub>minor</sub> = 8.48 min. <sup>1</sup>H NMR (400 MHz, Chloroform-*d*) δ 7.65 – 6.97 (m, 5H), 4.84 (q, *J* = 6.3 Hz, 1H), 2.22 (s, 1H), 1.46 (d, *J* = 6.5 Hz, 3H). <sup>13</sup>C{<sup>1</sup>H} NMR (101 MHz, Chloroform-*d*) δ 145.9, 128.5, 127.5, 125.4, 70.4, 25.2. **IR** (film, cm<sup>-1</sup>) 3044, 3029, 2973, 2874, 1493, 1451, 1368, 1284, 1076, 1029, 1010, 760, 698, 606, 540. These spectroscopic data correspond to the previously reported data.<sup>[8a]</sup>

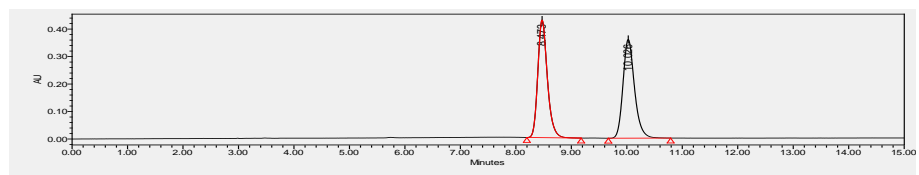

|   | Retention Time | % Area |
|---|----------------|--------|
| 1 | 8.473          | 49.73  |
| 2 | 10.026         | 50.27  |

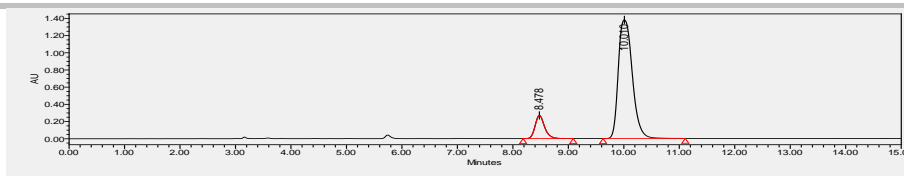

|   | Retention Time | % Area |
|---|----------------|--------|
| 1 | 8.478          | 8.47   |
| 2 | 10.010         | 91.53  |

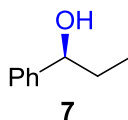

**(S)-1-Phenylethanol (7)**

(C<sub>9</sub>H<sub>10</sub>O) colorless oil; 15 mg, 92% yield, 90:10 er [ $\alpha$ ]<sub>D</sub><sup>28</sup> = -29 (*c* = 0.28, in CH<sub>2</sub>Cl<sub>2</sub>), dissolved in hexane for HPLC; **HPLC** (Daicel chiralcel **OJH**, hexane/*i*-PrOH = 97/3, flow rate 1 mL/min) retention time: *t*<sub>major</sub> = 12.04 min, *t*<sub>minor</sub> = 11.13 min. **<sup>1</sup>H NMR** (400 MHz, Chloroform-*d*)  $\delta$  7.4 – 7.2 (m, 5H), 4.6 – 4.5 (m, 1H), 1.9 – 1.7 (m, 3H), 0.9 (t, *J* = 7.4 Hz, 3H). **<sup>13</sup>C{<sup>1</sup>H} NMR** (101 MHz, Chloroform-*d*)  $\delta$  144.7, 128.5, 127.6, 126.1, 76.2, 32.0, 10.3. **IR** (film, cm<sup>-1</sup>) 3357, 3029, 2965, 2932, 2876, 1493, 1453, 1201, 1096, 1012, 974, 762, 699, 543. These spectroscopic data correspond to the previously reported data.<sup>[8d]</sup>

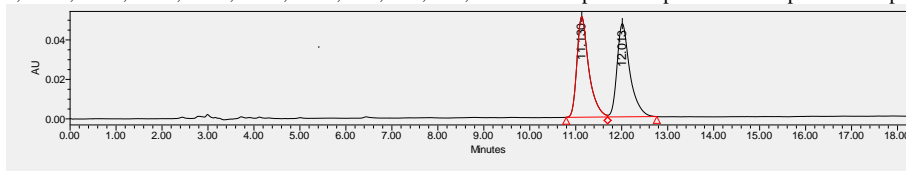

|   | Retention Time | % Area |
|---|----------------|--------|
| 1 | 11.130         | 49.90  |
| 2 | 12.013         | 50.10  |

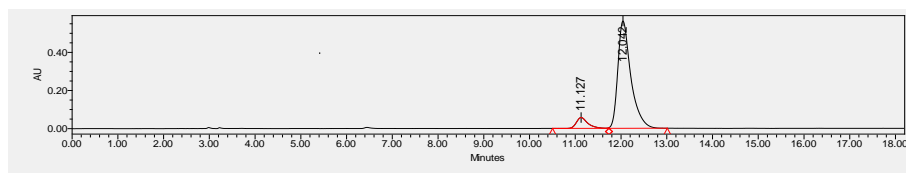

|   | Retention Time | % Area |
|---|----------------|--------|
| 1 | 11.127         | 10.13  |
| 2 | 12.042         | 89.87  |

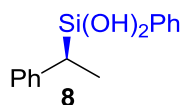

**(S)-Phenyl(1-phenylethyl)silane-1,1-diol (8)**

(C<sub>15</sub>H<sub>18</sub>Si) white solid. M.p. 120–122 °C. 110.0 mg, 90% yield, 91:9 er, [ $\alpha$ ]<sub>D</sub><sup>28</sup> = -24 (*c* = 1.80, in CH<sub>2</sub>Cl<sub>2</sub>), dissolved in hexane for HPLC; **HPLC** (Daicel chiralcel **OJH**, hexane/*i*-PrOH = 90/10, flow rate 1 mL/min) retention time: *t*<sub>major</sub> = 13.11 min, *t*<sub>minor</sub> = 11.05 min. **<sup>1</sup>H NMR** (400 MHz, Chloroform-*d*)  $\delta$  7.60 – 7.49 (m, 2H), 7.45 – 7.39 (m, 1H), 7.37 – 7.30 (m, 2H), 7.27 – 7.21 (m, 2H), 7.15 – 7.06 (m, 3H), 2.85 (s, 2H), 2.48 (q, *J* = 7.6 Hz, 1H), 1.40 (d, *J* = 7.6 Hz, 3H). **<sup>13</sup>C{<sup>1</sup>H} NMR** (101 MHz, Chloroform-*d*)  $\delta$  143.4, 134.4, 133.5, 130.5, 128.5, 127.9, 127.7, 125.2, 29.0, 14.6. Found 646.0668. **IR** (film, cm<sup>-1</sup>) 3319, 3072, 2963, 2874, 2361, 1598, 1491, 1453, 1429, 1122, 995, 841, 700, 522, 467. These spectroscopic data correspond to the previously reported data.<sup>[8a]</sup>

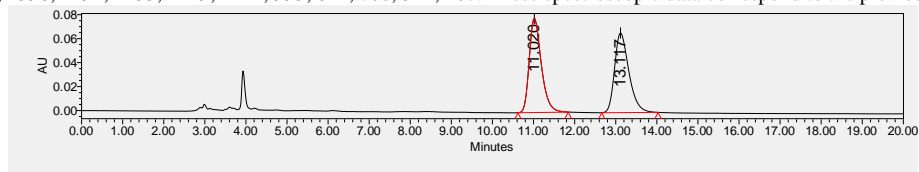

|   | Retention Time | % Area |
|---|----------------|--------|
| 1 | 11.020         | 49.99  |
| 2 | 13.117         | 50.01  |

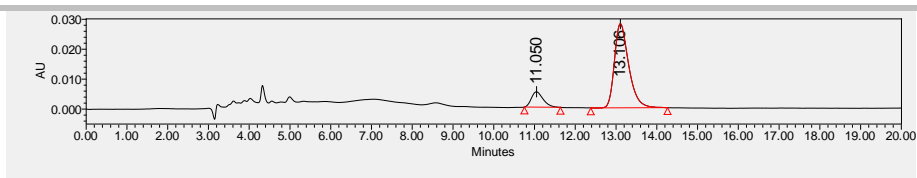

|   | Retention Time | % Area |
|---|----------------|--------|
| 1 | 11.050         | 8.99   |
| 2 | 13.106         | 91.01  |

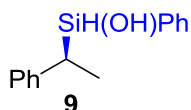

### (S)-Phenyl(1-phenylethyl)silanol (**9**)

(C<sub>14</sub>H<sub>16</sub>OSi) colorless oil; 79.9 mg, 70% yield, 1:1 dr, 91:9 er; 92:8 er,  $[\alpha]_D^{28} = -2.5$  ( $c = 1.58$ , in CH<sub>2</sub>Cl<sub>2</sub>), dissolved in hexane for HPLC; **HPLC** (Daicel chiralcel **OJH**, hexane/PrOH = 99/1, flow rate 1 mL/min) retention time:  $t_{major} = 54.44$  min, 56.86 min,  $t_{minor} = 41.77$  min, 61.96 min. **<sup>1</sup>H NMR** (400 MHz, Chloroform-*d*)  $\delta$  7.52 – 7.28 (m, 10H), 7.27 – 7.18 (m, 4H), 7.15 – 7.01 (m, 6H), 4.94 (d,  $J = 1.8$  Hz, 1H), 4.91 (d,  $J = 2.6$  Hz, 1H), 2.54 (q,  $J = 7.4$  Hz, 2H), 2.14 (d,  $J = 17.8$  Hz, 2H), 1.40 (dd,  $J = 13.2, 7.6$  Hz, 6H). **<sup>13</sup>C{<sup>1</sup>H} NMR** (101 MHz, Chloroform-*d*)  $\delta$  143.3, 143.2, 134.2, 134.1, 130.5, 130.4, 128.6, 128.5, 128.0, 127.9, 127.6, 127.6, 125.3, 125.2, 29.2, 29.1, 14.3, 14.0. **IR** (film, cm<sup>-1</sup>) 3380, 3068, 3024, 2957, 2927, 2870, 2360, 2126, 1598, 1491, 1451, 1429, 1165, 1118, 1087, 823, 759, 736, 698, 567, 492. These spectroscopic data correspond to the previously reported data.<sup>[8a]</sup>

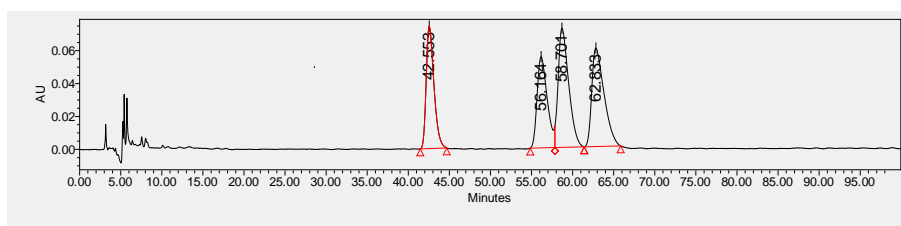

|   | Retention Time | % Area |
|---|----------------|--------|
| 1 | 42.553         | 21.72  |
| 2 | 56.164         | 21.53  |
| 3 | 58.701         | 28.86  |
| 4 | 62.833         | 27.90  |

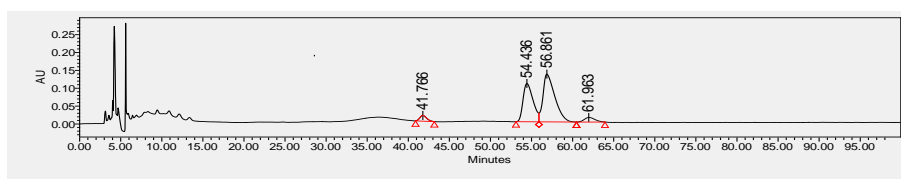

|   | Retention Time | % Area |
|---|----------------|--------|
| 1 | 41.766         | 3.80   |
| 2 | 54.436         | 38.48  |
| 3 | 56.861         | 52.97  |
| 4 | 61.963         | 4.75   |

## 9. Computational methods

All computations were carried out using the Gaussian 09 D.01 software package<sup>[9a]</sup>. The calculation of geometry optimization, frequency and Gibbs energy corrections were carried out for **STR**, **TS1**, **IM1**, **TS2S**, **TS2R**, **TS2me**, **IM2S**, **IM2R**, **IM2me**, **IM3S**, **IM3R**, **IM3me**, **TS3S**, **TS3R**, **TS3me**, **PROD S**, **PROD R**, **PRODme** and **PhSiH<sub>2</sub>N(TMS)<sub>2</sub>**, **PhC<sub>2</sub>H<sub>3</sub>**, **Add**, **PhSiH<sub>3</sub>**, at the temperature of 353.15K. All calculations were performed at B3LYP<sup>[9b]</sup> level of theory with Grimme's D3 empirical dispersion correction<sup>[9c]</sup> and SMD (toluene) implicit solvation model<sup>[9d]</sup>. The 6-311G(d) basis set<sup>[9d-9g]</sup> was used for all atoms except for the metal center La, which the MWB46 pseudo potential and its basis set were applied



. Frequency calculations for all stationary points were calculated at the same level and no imaginary frequencies were observed. The single imaginary frequency of all transition states **TS1**, **TS2S**, **TS2R**, **TS2me**, **TS3S**, **TS3R** and **TS3me**, which was lower than  $-100\text{ cm}^{-1}$ , was observed. Reaction paths were traced by the intrinsic reaction coordinate (IRC) method for all transition states to confirm the connectivity of the corresponding reactants and products. Single-point energies were obtained at the B3LYP<sup>2</sup>/6-311+G(2d,p)<sup>[9d-9g, 9i]</sup> level of theory for all non-metal atoms and B3LYP<sup>2</sup>/MWB46<sup>[9h, 9i]</sup> level of theory for La with GD3 empirical dispersion correction and SMD (toluene) implicit solvation model<sup>[9d]</sup>. The atomic configurations for transition states were presented by CYLview<sup>[9k]</sup> and intermolecular weak interactions were analyzed via IGMH method<sup>[9l]</sup> implemented in Multiwfn (version 3.8)<sup>[9m]</sup> and VMD<sup>[9n]</sup> was used as the visualizer.

## Energy profiles

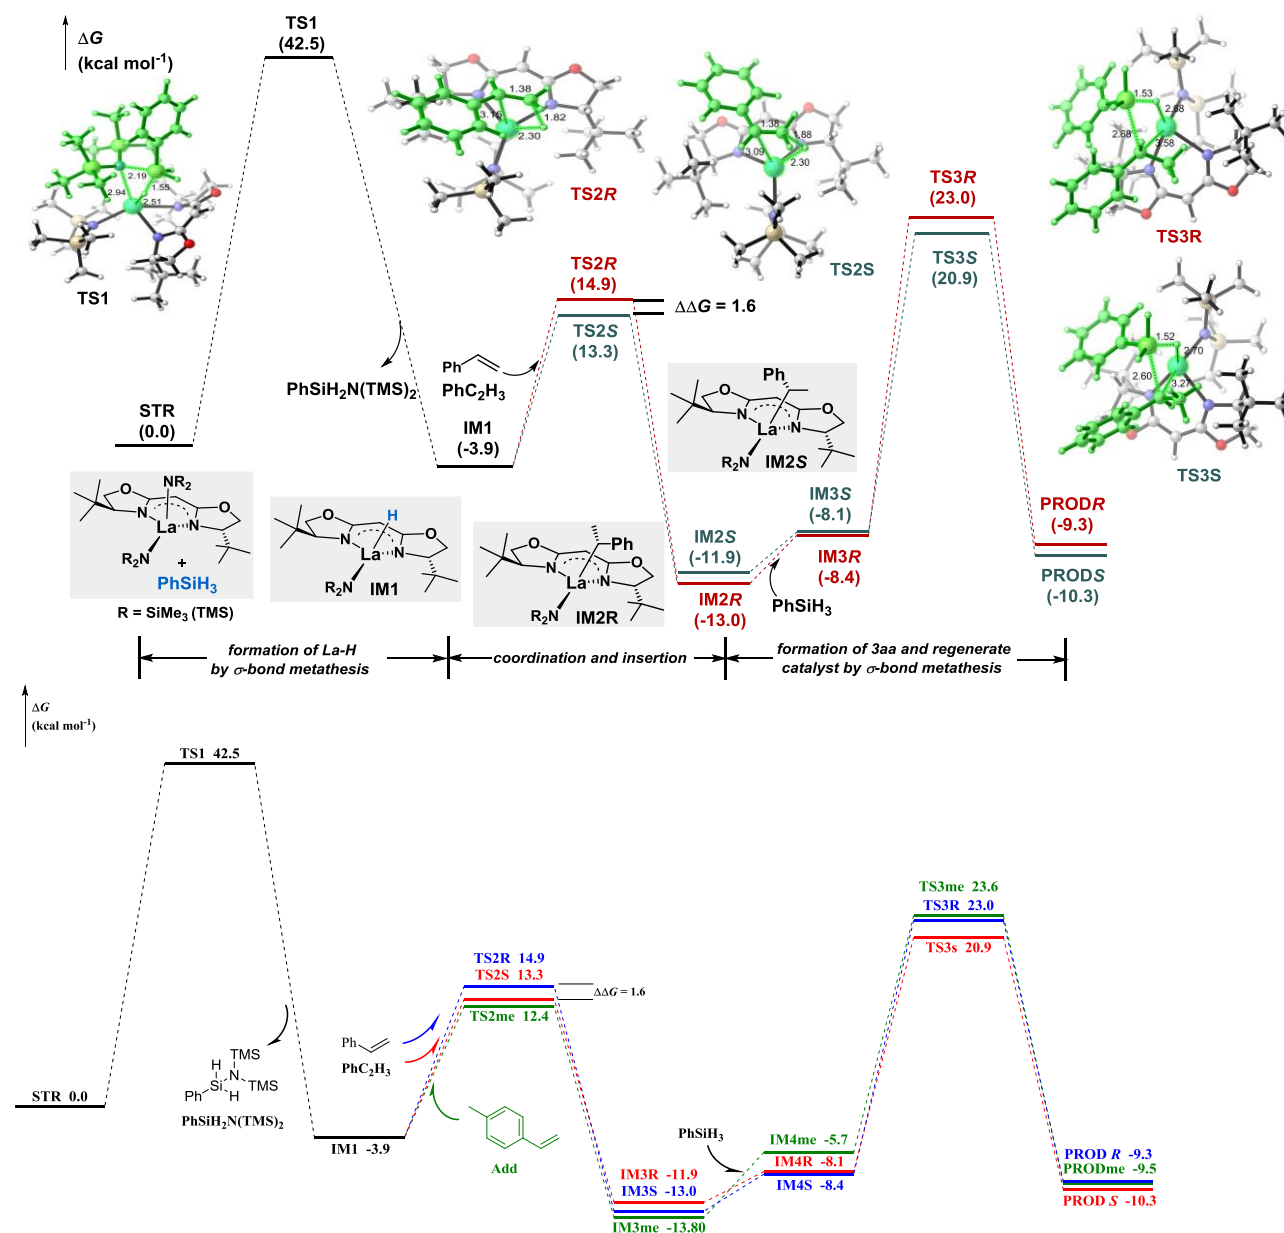

Figure S1. Energy profiles for the Si-H insertion and asymmetric metathesis reaction between  $\text{PhC}_2\text{H}_3$  and **IM2** catalyzed by **La-Box-tBu** at the B3LYP(D3) level

## Transition states

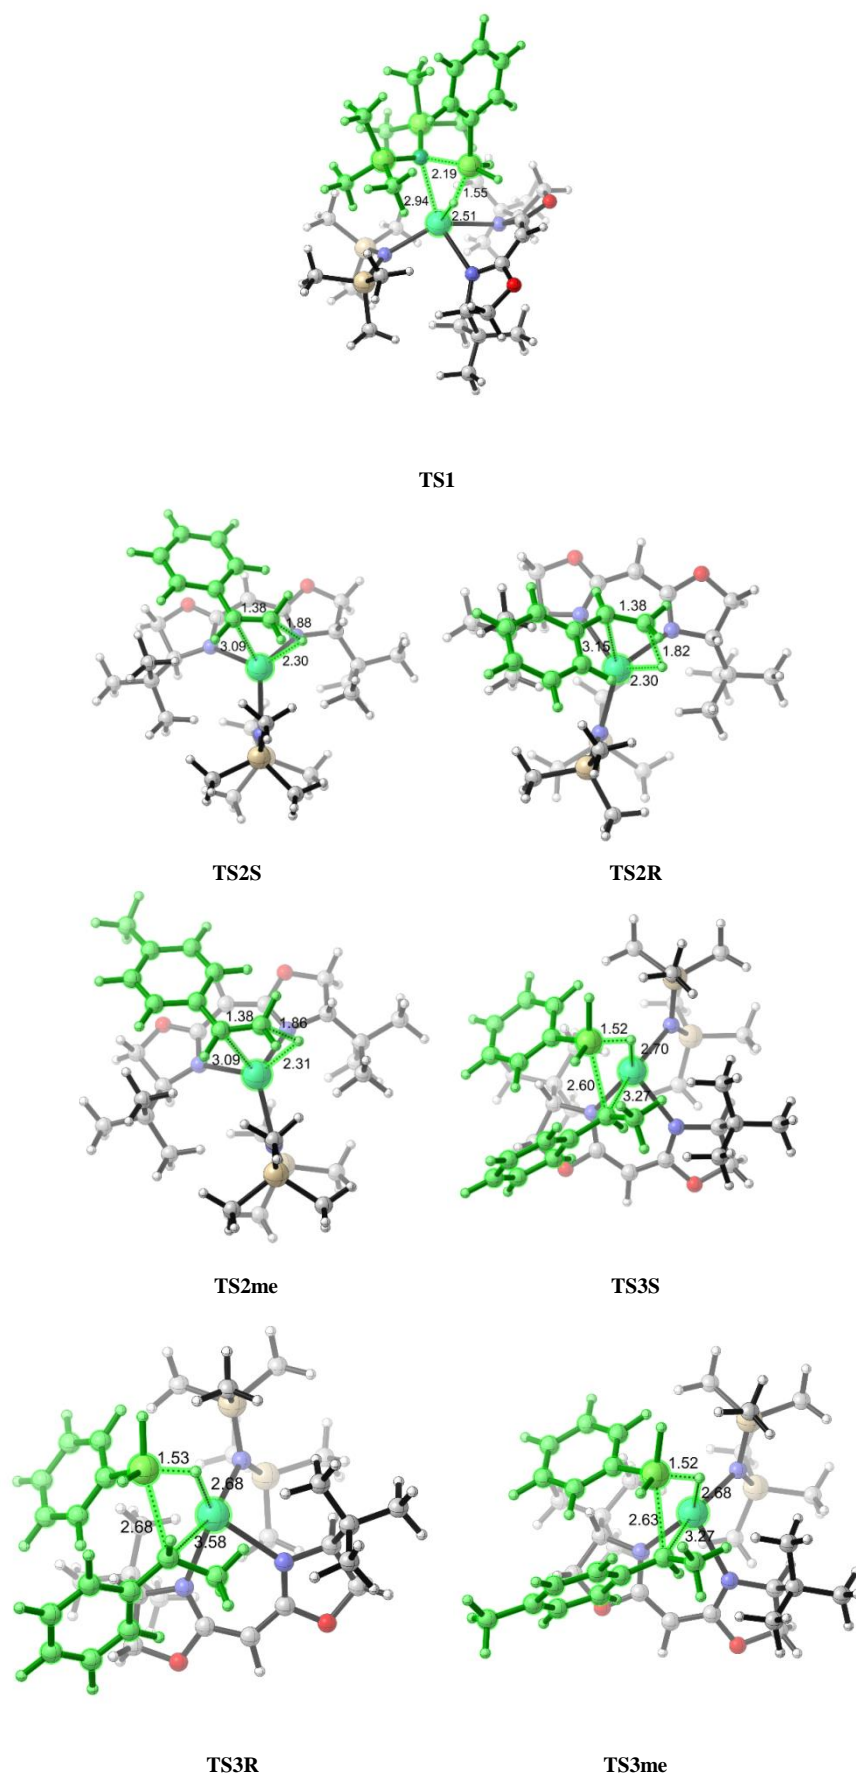

Figure S2 Optimized geometries of all transition states including La-H-N metathesis reaction (**TS1**) and  $\text{PhC}_2\text{H}_3$   $\alpha$ -addition transition states (**TS2**) and La-H-C metathesis reaction (**TS3**), showing the distances between quaternary ring which undergoes bond breaking and formation, respectively.

## Weak interactions

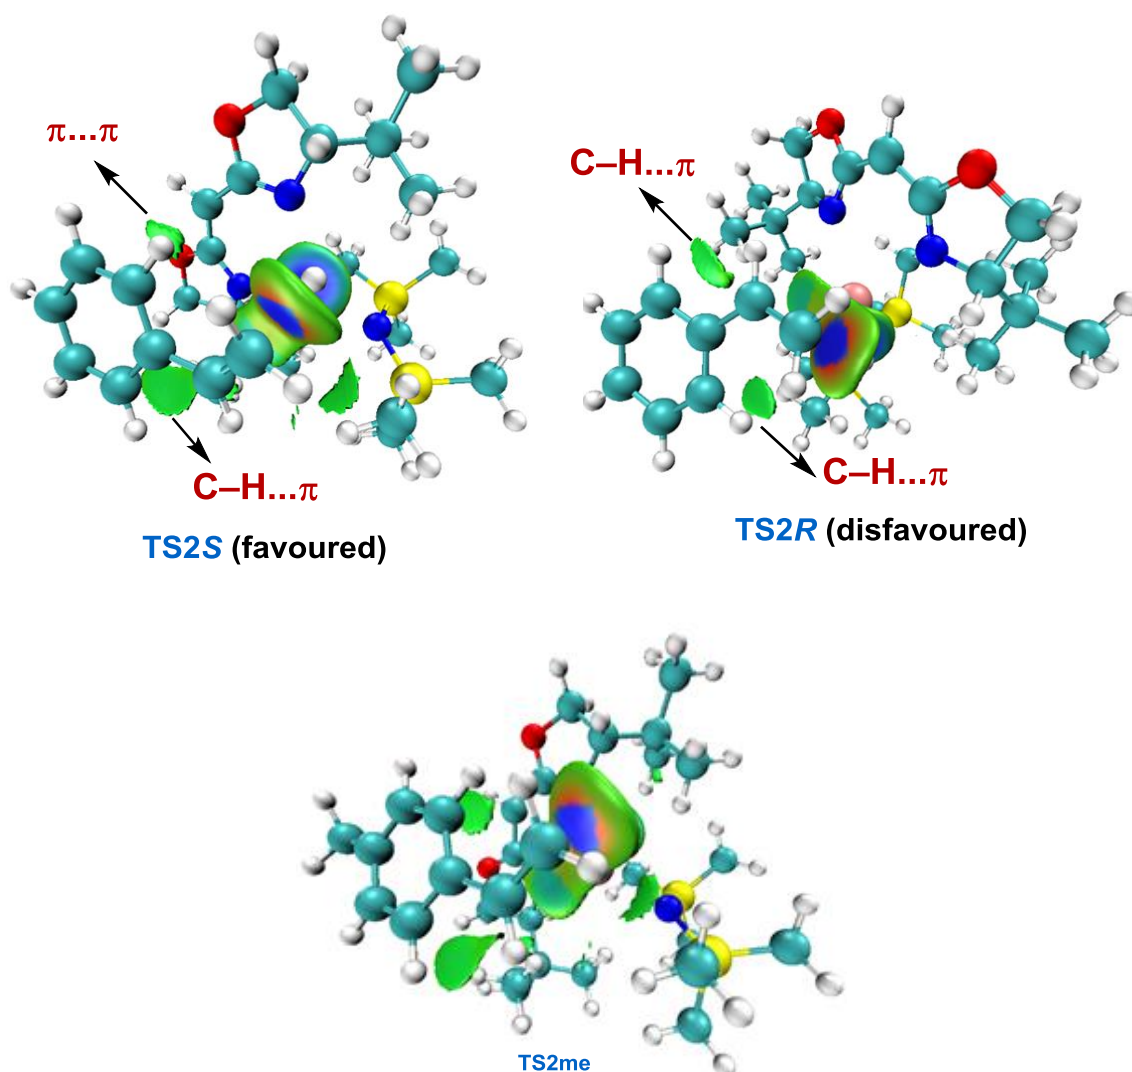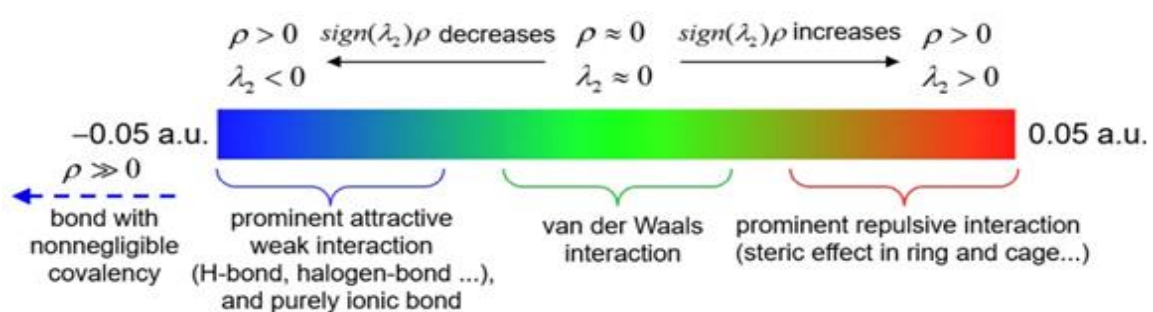

Figure S3. Weak interactions analyzed by IGMH methods of chirality determination transition states of **TS2S**, **TS2R** and **TS2me**, which showed the  $\sigma$ - $\pi$  attractions between the substrate styrene and *tert*-butyl-oxazolidine and trimethylsilyl anion of catalysts.

---

## Energies and coordinates

### STR

|    |          |          |          |
|----|----------|----------|----------|
| La | -0.78879 | -0.17894 | 0.00846  |
| Si | -1.19234 | -2.23617 | 3.07461  |
| Si | 1.02254  | -0.19838 | 3.04525  |
| Si | 1.43941  | -0.15436 | -2.8154  |
| Si | 1.15824  | -2.87625 | -1.39845 |
| O  | -2.01462 | 3.46045  | 2.10147  |
| O  | -5.24342 | 0.65562  | 0.48543  |
| N  | -1.20959 | 2.30859  | 0.33415  |
| N  | -3.30974 | 0.15669  | -0.57997 |
| N  | -0.27901 | -1.01795 | 2.24793  |
| N  | 0.71138  | -1.22781 | -1.67276 |
| C  | -2.17697 | 2.42174  | 1.23634  |
| C  | -3.33436 | 1.65038  | 1.39898  |
| H  | -3.9754  | 1.9121   | 2.22923  |
| C  | -3.89164 | 0.80804  | 0.41633  |
| C  | -0.73746 | 4.0671   | 1.78674  |
| H  | -0.0007  | 3.71301  | 2.51312  |
| H  | -0.85196 | 5.14443  | 1.88839  |
| C  | -0.43526 | 3.56625  | 0.36641  |
| H  | 0.63086  | 3.34664  | 0.26221  |
| C  | -0.82474 | 4.54829  | -0.78286 |
| C  | 0.13041  | 5.75273  | -0.73969 |
| H  | -0.08967 | 6.44807  | -1.55509 |
| H  | 1.17415  | 5.43921  | -0.84745 |
| H  | 0.04701  | 6.31521  | 0.19492  |
| C  | -0.66711 | 3.83365  | -2.13406 |
| H  | -1.32594 | 2.96523  | -2.19644 |
| H  | 0.35868  | 3.49636  | -2.29995 |
| H  | -0.92558 | 4.50655  | -2.95724 |
| C  | -2.27917 | 5.02862  | -0.64699 |
| H  | -2.98218 | 4.19244  | -0.67916 |
| H  | -2.53137 | 5.70131  | -1.47222 |
| H  | -2.45469 | 5.5761   | 0.28238  |
| C  | -5.61307 | -0.27239 | -0.55799 |
| H  | -6.53938 | 0.08226  | -1.00617 |
| H  | -5.77781 | -1.25273 | -0.10251 |
| C  | -4.40541 | -0.23802 | -1.50348 |
| H  | -4.54698 | 0.59261  | -2.2107  |
| C  | -4.19    | -1.50681 | -2.36016 |
| C  | -3.90011 | -2.74658 | -1.50641 |
| H  | -3.72092 | -3.61675 | -2.14342 |
| H  | -4.72384 | -2.99833 | -0.835   |
| H  | -3.01233 | -2.60933 | -0.89102 |
| C  | -3.02447 | -1.27252 | -3.33425 |
| H  | -2.9145  | -2.1198  | -4.01764 |
| H  | -2.06613 | -1.1608  | -2.82357 |
| H  | -3.18285 | -0.37588 | -3.94041 |
| C  | -5.47374 | -1.7435  | -3.17867 |
| H  | -5.34013 | -2.58345 | -3.86615 |
| H  | -5.73504 | -0.8658  | -3.77864 |
| H  | -6.33025 | -1.9804  | -2.54055 |
| C  | -2.85105 | -2.54175 | 2.20759  |
| H  | -3.47035 | -3.19927 | 2.82823  |
| H  | -2.75542 | -3.04828 | 1.24334  |
| H  | -3.42829 | -1.62349 | 2.05541  |
| C  | -0.29441 | -3.90262 | 3.12728  |
| H  | -0.90862 | -4.67661 | 3.60276  |
| H  | 0.64239  | -3.83984 | 3.6894   |
| H  | -0.04    | -4.25874 | 2.12396  |
| C  | -1.62409 | -1.77054 | 4.85967  |
| H  | -2.27624 | -2.52843 | 5.30932  |
| H  | -2.15307 | -0.8132  | 4.90782  |
| H  | -0.74201 | -1.6907  | 5.50283  |
| C  | 2.24607  | -1.34198 | 3.9263   |
| H  | 1.78693  | -1.89838 | 4.74918  |
| H  | 3.07332  | -0.76357 | 4.35469  |
| H  | 2.68064  | -2.0717  | 3.23593  |
| C  | 2.05146  | 0.75869  | 1.76697  |
| H  | 2.47002  | 0.12336  | 0.98166  |
| H  | 2.90482  | 1.21352  | 2.27904  |
| H  | 1.52559  | 1.59701  | 1.29779  |
| C  | 0.41932  | 1.09018  | 4.2975   |
| H  | 0.07369  | 0.63251  | 5.22903  |

---

|    |          |          |          |
|----|----------|----------|----------|
| H  | -0.42325 | 1.66312  | 3.89532  |
| H  | 1.21104  | 1.80116  | 4.56216  |
| C  | 2.206    | 1.32064  | -1.8934  |
| H  | 1.50729  | 1.87855  | -1.26218 |
| H  | 2.6418   | 2.04869  | -2.5862  |
| H  | 3.0066   | 0.96324  | -1.24284 |
| C  | 2.85226  | -0.82302 | -3.87877 |
| H  | 3.28445  | 0.00597  | -4.45195 |
| H  | 2.53307  | -1.58087 | -4.59821 |
| H  | 3.65776  | -1.24889 | -3.27478 |
| C  | 0.14097  | 0.54548  | -4.00806 |
| H  | 0.56639  | 1.31872  | -4.65821 |
| H  | -0.70868 | 1.00305  | -3.48953 |
| H  | -0.26636 | -0.23791 | -4.6561  |
| C  | 2.37258  | -3.03965 | 0.04227  |
| H  | 1.92967  | -2.64769 | 0.96351  |
| H  | 3.29607  | -2.48185 | -0.13813 |
| H  | 2.64905  | -4.08282 | 0.23578  |
| C  | 1.88085  | -3.81021 | -2.88046 |
| H  | 1.287    | -3.6722  | -3.78985 |
| H  | 1.88218  | -4.88401 | -2.65848 |
| H  | 2.91148  | -3.53112 | -3.11092 |
| C  | -0.36653 | -3.90087 | -0.91461 |
| H  | -0.87576 | -3.55526 | -0.00997 |
| H  | -0.07044 | -4.9345  | -0.70332 |
| H  | -1.10482 | -3.93719 | -1.72112 |
| Si | 5.27929  | 2.77214  | -0.04647 |
| H  | 6.25624  | 3.41572  | 0.87045  |
| H  | 3.91787  | 3.08378  | 0.45837  |
| H  | 5.43034  | 3.35123  | -1.40491 |
| C  | 5.57168  | 0.91797  | -0.12983 |
| C  | 5.59113  | 0.1352   | 1.03702  |
| C  | 5.76597  | 0.27221  | -1.36085 |
| C  | 5.79388  | -1.24083 | 0.97697  |
| H  | 5.44176  | 0.59835  | 2.00851  |
| C  | 5.97657  | -1.10519 | -1.4243  |
| H  | 5.74392  | 0.84311  | -2.28459 |
| C  | 5.99074  | -1.8634  | -0.25574 |
| H  | 5.79169  | -1.82831 | 1.88949  |
| H  | 6.12465  | -1.5855  | -2.3862  |
| H  | 6.14481  | -2.93645 | -0.30431 |

Zero-point correction = 0.964818

Thermal correction to Enthalpy = 1.051731

Thermal correction to Gibbs Free Energy = 0.835794

### TS1

|    |           |           |           |
|----|-----------|-----------|-----------|
| La | -0.502844 | 0.009899  | 0.148675  |
| Si | -2.379711 | -3.197967 | -0.459574 |
| Si | -2.186896 | -2.258926 | 2.365166  |
| O  | -1.665460 | 1.710693  | -3.803590 |
| O  | 0.229109  | 4.343264  | -0.546748 |
| N  | -1.936786 | 0.764909  | -1.777376 |
| N  | -0.915125 | 2.625425  | 0.394641  |
| N  | -1.817965 | -2.005671 | 0.688572  |
| C  | -1.324510 | 1.696851  | -2.491118 |
| C  | -0.420133 | 2.665281  | -2.037411 |
| H  | 0.140555  | 3.219746  | -2.775567 |
| C  | -0.386717 | 3.135191  | -0.719418 |
| C  | -2.592520 | 0.610851  | -3.997742 |
| H  | -2.043703 | -0.224754 | -4.441550 |
| H  | -3.358946 | 0.947009  | -4.693184 |
| C  | -3.080539 | 0.289152  | -2.577081 |
| H  | -3.195182 | -0.787014 | -2.450346 |
| C  | -4.419881 | 0.967865  | -2.148999 |
| C  | -5.574291 | 0.312085  | -2.925043 |
| H  | -6.532328 | 0.754149  | -2.636296 |
| H  | -5.637338 | -0.762053 | -2.727789 |
| H  | -5.471622 | 0.445449  | -4.006183 |
| C  | -4.629032 | 0.750445  | -0.640213 |
| H  | -3.871466 | 1.286197  | -0.063092 |
| H  | -4.576805 | -0.305309 | -0.365892 |
| H  | -5.608501 | 1.126878  | -0.330023 |
| C  | -4.407426 | 2.480693  | -2.424160 |
| H  | -3.600032 | 2.980303  | -1.883538 |
| H  | -5.348865 | 2.928720  | -2.091984 |
| H  | -4.294388 | 2.713266  | -3.486076 |
| C  | 0.131505  | 4.649010  | 0.864612  |

|    |           |           |           |
|----|-----------|-----------|-----------|
| H  | 0.000997  | 5.725046  | 0.960864  |
| H  | 1.057585  | 4.337414  | 1.359717  |
| C  | -1.080393 | 3.820512  | 1.274395  |
| H  | -1.966826 | 4.359760  | 0.903381  |
| C  | -1.336898 | 3.592638  | 2.774275  |
| C  | -0.253495 | 2.744642  | 3.447735  |
| H  | -0.487923 | 2.590253  | 4.504532  |
| H  | 0.728400  | 3.217700  | 3.392595  |
| H  | -0.164109 | 1.754658  | 2.999858  |
| C  | -2.716947 | 2.928974  | 2.917646  |
| H  | -2.920118 | 2.649572  | 3.954979  |
| H  | -2.797429 | 2.031641  | 2.302244  |
| H  | -3.510684 | 3.607970  | 2.591603  |
| C  | -1.380763 | 4.968542  | 3.467081  |
| H  | -1.697027 | 4.863035  | 4.508943  |
| H  | -2.089177 | 5.642341  | 2.974945  |
| H  | -0.401327 | 5.455740  | 3.471156  |
| C  | -1.443887 | -3.057576 | -2.101393 |
| H  | -1.236963 | -2.033667 | -2.432081 |
| H  | -2.024995 | -3.528008 | -2.902373 |
| H  | -0.490598 | -3.588149 | -2.052181 |
| C  | -2.138306 | -4.990725 | 0.109569  |
| H  | -2.393615 | -5.667151 | -0.715078 |
| H  | -2.785843 | -5.261425 | 0.949454  |
| H  | -1.108078 | -5.210345 | 0.399204  |
| C  | -4.226221 | -3.077943 | -0.868626 |
| H  | -4.542293 | -3.981451 | -1.403796 |
| H  | -4.467896 | -2.230489 | -1.512263 |
| H  | -4.852952 | -2.997615 | 0.022847  |
| C  | -1.107257 | -3.561151 | 3.212261  |
| H  | -0.047229 | -3.294614 | 3.176956  |
| H  | -1.204433 | -4.554194 | 2.767163  |
| H  | -1.380879 | -3.651572 | 4.270233  |
| C  | -3.990928 | -2.710448 | 2.715678  |
| H  | -4.686993 | -1.958425 | 2.330342  |
| H  | -4.157113 | -2.781742 | 3.796831  |
| H  | -4.278815 | -3.674969 | 2.287413  |
| C  | -1.876675 | -0.671540 | 3.356151  |
| H  | -0.833909 | -0.334092 | 3.387547  |
| H  | -2.129912 | -0.866643 | 4.404086  |
| H  | -2.505622 | 0.166129  | 3.049494  |
| Si | 2.562101  | -2.485862 | -0.377500 |
| Si | 3.121185  | -0.322081 | 1.643169  |
| N  | 2.325251  | -0.806114 | 0.144426  |
| C  | 2.225112  | -2.671771 | -2.234395 |
| H  | 1.239000  | -2.335046 | -2.553016 |
| H  | 2.300697  | -3.733695 | -2.494917 |
| H  | 2.949488  | -2.149628 | -2.866375 |
| C  | 4.289766  | -3.205320 | -0.085400 |
| H  | 4.387486  | -4.119537 | -0.683730 |
| H  | 4.437619  | -3.499096 | 0.957791  |
| H  | 5.110593  | -2.543479 | -0.361460 |
| C  | 1.420408  | -3.695532 | 0.518440  |
| H  | 1.442921  | -4.669994 | 0.017889  |
| H  | 0.381694  | -3.369928 | 0.563253  |
| H  | 1.747842  | -3.864241 | 1.548103  |
| C  | 2.854813  | 1.522386  | 1.993978  |
| H  | 1.865004  | 1.912211  | 1.756954  |
| H  | 3.569140  | 2.133484  | 1.437456  |
| H  | 3.030241  | 1.711109  | 3.058818  |
| C  | 4.991308  | -0.564957 | 1.768210  |
| H  | 5.278154  | -1.593848 | 1.994739  |
| H  | 5.368812  | 0.059971  | 2.586878  |
| H  | 5.520278  | -0.260862 | 0.863473  |
| C  | 2.383272  | -1.255760 | 3.123471  |
| H  | 1.297418  | -1.148947 | 3.219892  |
| H  | 2.817730  | -0.881893 | 4.057790  |
| H  | 2.593429  | -2.328316 | 3.084795  |
| Si | 2.439812  | 0.616588  | -1.511567 |
| H  | 2.332096  | 1.252137  | -2.898439 |
| H  | 2.045757  | 1.749456  | -0.636978 |
| H  | 1.093954  | -0.097378 | -1.786653 |
| C  | 4.356800  | 0.587142  | -1.528991 |
| C  | 4.975909  | 1.763048  | -1.069946 |
| C  | 5.194207  | -0.418375 | -2.030480 |
| C  | 6.362476  | 1.909998  | -1.068868 |
| H  | 4.369042  | 2.586922  | -0.704706 |

---

|   |          |           |           |
|---|----------|-----------|-----------|
| C | 6.582021 | -0.278220 | -2.037852 |
| H | 4.776070 | -1.337206 | -2.423657 |
| C | 7.174458 | 0.882846  | -1.545047 |
| H | 6.807173 | 2.827084  | -0.693106 |
| H | 7.200984 | -1.081479 | -2.427136 |
| H | 8.254775 | 0.989599  | -1.541977 |

Zero-point correction = 0.967403

Thermal correction to Enthalpy = 1.051627

Thermal correction to Gibbs Free Energy = 0.846682

### IM1

|    |          |          |          |
|----|----------|----------|----------|
| La | 0.15045  | 0.03155  | -0.96664 |
| Si | 1.9464   | -2.35981 | 1.09099  |
| Si | 3.67007  | -0.79645 | -0.88035 |
| O  | -4.26778 | -0.16468 | -1.56701 |
| O  | -2.43978 | 3.76043  | -0.02656 |
| N  | -2.27894 | -0.59522 | -0.59127 |
| N  | -0.87144 | 2.14438  | 0.16003  |
| N  | 2.14969  | -1.15654 | -0.13177 |
| C  | -3.11417 | 0.33658  | -1.04533 |
| C  | -3.0028  | 1.73004  | -1.03391 |
| H  | -3.82936 | 2.27985  | -1.462   |
| C  | -2.06177 | 2.48295  | -0.30774 |
| C  | -4.12882 | -1.60443 | -1.57456 |
| H  | -3.81778 | -1.91521 | -2.57662 |
| H  | -5.10484 | -2.03107 | -1.35251 |
| C  | -3.03712 | -1.86289 | -0.52755 |
| H  | -2.39431 | -2.69173 | -0.84058 |
| C  | -3.56577 | -2.18927 | 0.90659  |
| C  | -4.16404 | -3.60577 | 0.89637  |
| H  | -4.52765 | -3.8778  | 1.8917   |
| H  | -3.41817 | -4.3524  | 0.60422  |
| H  | -5.01058 | -3.69471 | 0.20894  |
| C  | -2.39343 | -2.14813 | 1.89677  |
| H  | -1.97128 | -1.14327 | 1.95586  |
| H  | -1.59576 | -2.8393  | 1.6149   |
| H  | -2.72461 | -2.42718 | 2.90145  |
| C  | -4.6281  | -1.17737 | 1.3692   |
| H  | -4.23803 | -0.15662 | 1.37247  |
| H  | -4.94481 | -1.40951 | 2.39056  |
| H  | -5.52316 | -1.19003 | 0.74273  |
| C  | -1.33323 | 4.39841  | 0.6441   |
| H  | -1.73353 | 4.97474  | 1.47681  |
| H  | -0.85162 | 5.07657  | -0.06512 |
| C  | -0.43441 | 3.22569  | 1.07286  |
| H  | -0.70043 | 2.92975  | 2.09776  |
| C  | 1.08511  | 3.53262  | 1.08212  |
| C  | 1.6094   | 3.91921  | -0.30992 |
| H  | 2.6997   | 3.99654  | -0.30125 |
| H  | 1.22254  | 4.88446  | -0.64459 |
| H  | 1.33558  | 3.19032  | -1.07724 |
| C  | 1.85302  | 2.30868  | 1.60896  |
| H  | 2.91296  | 2.54361  | 1.74047  |
| H  | 1.81706  | 1.44615  | 0.93723  |
| H  | 1.46432  | 1.97732  | 2.57643  |
| C  | 1.32555  | 4.70354  | 2.05389  |
| H  | 2.39371  | 4.92482  | 2.13337  |
| H  | 0.96199  | 4.4694   | 3.05948  |
| H  | 0.82904  | 5.6205   | 1.72307  |
| C  | 0.80175  | -3.73845 | 0.45205  |
| H  | -0.11841 | -3.36823 | -0.0153  |
| H  | 0.50001  | -4.43751 | 1.23983  |
| H  | 1.32293  | -4.32077 | -0.31671 |
| C  | 3.50887  | -3.24916 | 1.68039  |
| H  | 3.22691  | -4.07256 | 2.34757  |
| H  | 4.17587  | -2.59375 | 2.24677  |
| H  | 4.08792  | -3.68856 | 0.86247  |
| C  | 1.1795   | -1.58998 | 2.64718  |
| H  | 0.8966   | -2.3478  | 3.38634  |
| H  | 0.28352  | -0.99305 | 2.44898  |
| H  | 1.90399  | -0.92254 | 3.12693  |
| C  | 4.25816  | -2.15598 | -2.05781 |
| H  | 3.54403  | -2.30554 | -2.87527 |
| H  | 4.37021  | -3.11846 | -1.54716 |
| H  | 5.22734  | -1.91432 | -2.50955 |
| C  | 5.07846  | -0.44032 | 0.33751  |
| H  | 4.75094  | 0.20091  | 1.16293  |

---

|   |         |          |          |
|---|---------|----------|----------|
| H | 5.90067 | 0.07814  | -0.16991 |
| H | 5.49912 | -1.34952 | 0.77492  |
| C | 3.49564 | 0.78711  | -1.9167  |
| H | 2.75414 | 0.72773  | -2.72184 |
| H | 4.44871 | 0.99961  | -2.41428 |
| H | 3.27548 | 1.66858  | -1.30415 |
| H | 0.16733 | 0.06923  | -3.23744 |

Zero-point correction = 0.622820

Thermal correction to Enthalpy = 0.676258

Thermal correction to Gibbs Free Energy = 0.534336

### TS2S

|    |          |          |          |
|----|----------|----------|----------|
| La | 0.17801  | 0.10905  | 0.65925  |
| Si | 3.08598  | -1.07558 | -1.29736 |
| Si | 2.83523  | -2.15959 | 1.50918  |
| O  | -1.32128 | 4.12244  | -1.03502 |
| O  | -3.28003 | 0.25165  | -2.55461 |
| N  | 0.01389  | 2.40045  | -0.43196 |
| N  | -1.48166 | -0.35879 | -1.32067 |
| N  | 2.2425   | -1.16352 | 0.2216   |
| C  | -1.1197  | 2.7736   | -1.00977 |
| C  | -2.15977 | 2.02601  | -1.57262 |
| H  | -2.97906 | 2.59968  | -1.98256 |
| C  | -2.24169 | 0.64093  | -1.75568 |
| C  | -0.10511 | 4.75317  | -0.59192 |
| H  | -0.37032 | 5.56423  | 0.08582  |
| H  | 0.39582  | 5.17083  | -1.46896 |
| C  | 0.68685  | 3.6185   | 0.08057  |
| H  | 0.52378  | 3.6606   | 1.16563  |
| C  | 2.22207  | 3.66645  | -0.13411 |
| C  | 2.734    | 5.014    | 0.40662  |
| H  | 3.8237   | 5.07017  | 0.33016  |
| H  | 2.47046  | 5.14848  | 1.4608   |
| H  | 2.32703  | 5.8632   | -0.15068 |
| C  | 2.87619  | 2.53652  | 0.67749  |
| H  | 2.6784   | 1.54679  | 0.2579   |
| H  | 2.54174  | 2.54426  | 1.71915  |
| H  | 3.96536  | 2.63674  | 0.68073  |
| C  | 2.60676  | 3.52044  | -1.61322 |
| H  | 2.21292  | 2.59648  | -2.03898 |
| H  | 3.69491  | 3.50433  | -1.72363 |
| H  | 2.23688  | 4.34814  | -2.22391 |
| C  | -3.30594 | -1.18637 | -2.52442 |
| H  | -3.60863 | -1.53711 | -3.50955 |
| H  | -4.0385  | -1.50419 | -1.77498 |
| C  | -1.86951 | -1.54434 | -2.14093 |
| H  | -1.26271 | -1.51719 | -3.05882 |
| C  | -1.68039 | -2.96311 | -1.54334 |
| C  | -2.27202 | -3.09862 | -0.13597 |
| H  | -2.17172 | -4.12782 | 0.22162  |
| H  | -3.32974 | -2.83689 | -0.10599 |
| H  | -1.77221 | -2.45687 | 0.5939   |
| C  | -0.18869 | -3.33249 | -1.51975 |
| H  | -0.04666 | -4.33679 | -1.10977 |
| H  | 0.41676  | -2.65268 | -0.91776 |
| H  | 0.23299  | -3.32874 | -2.52859 |
| C  | -2.39756 | -3.96188 | -2.47605 |
| H  | -2.18235 | -4.99003 | -2.17103 |
| H  | -2.06381 | -3.85192 | -3.51277 |
| H  | -3.48409 | -3.83972 | -2.45775 |
| C  | 4.62106  | 0.03818  | -1.26504 |
| H  | 4.36832  | 1.09755  | -1.35117 |
| H  | 5.28407  | -0.2003  | -2.10514 |
| H  | 5.20197  | -0.08486 | -0.34669 |
| C  | 3.67757  | -2.76824 | -1.91675 |
| H  | 4.06825  | -2.68554 | -2.93786 |
| H  | 2.86802  | -3.50384 | -1.9363  |
| H  | 4.48388  | -3.18219 | -1.30238 |
| C  | 1.95311  | -0.39318 | -2.65845 |
| H  | 2.54045  | -0.21711 | -3.5669  |
| H  | 1.46832  | 0.55797  | -2.41703 |
| H  | 1.15897  | -1.097   | -2.92105 |
| C  | 4.67367  | -1.92097 | 1.88766  |
| H  | 4.90049  | -0.88029 | 2.14185  |
| H  | 5.31422  | -2.19796 | 1.04428  |
| H  | 4.98174  | -2.53917 | 2.7388   |
| C  | 2.54148  | -4.01159 | 1.23771  |



---

|   |          |          |         |
|---|----------|----------|---------|
| H | 1.48407  | -4.2271  | 1.04954 |
| H | 2.83638  | -4.58909 | 2.12201 |
| H | 3.10548  | -4.40829 | 0.38945 |
| C | 1.9037   | -1.75433 | 3.12264 |
| H | 1.9636   | -0.69843 | 3.40852 |
| H | 2.3558   | -2.31871 | 3.94563 |
| H | 0.84752  | -2.05144 | 3.1166  |
| H | 0.21971  | 1.37737  | 2.57476 |
| C | -4.58811 | 1.43721  | 1.09585 |
| C | -3.40485 | 1.16383  | 1.7751  |
| C | -3.10798 | -0.13684 | 2.22948 |
| C | -4.06314 | -1.14238 | 1.98517 |
| C | -5.24934 | -0.86489 | 1.31661 |
| C | -5.51929 | 0.42732  | 0.86133 |
| H | -4.77342 | 2.44367  | 0.73535 |
| H | -2.691   | 1.96723  | 1.93081 |
| H | -3.86464 | -2.15303 | 2.32907 |
| H | -5.9685  | -1.66116 | 1.1481  |
| H | -6.43845 | 0.64152  | 0.32619 |
| C | -1.85519 | -0.46042 | 2.92048 |
| H | -1.61736 | -1.5174  | 3.03206 |
| C | -1.07441 | 0.45933  | 3.58298 |
| H | -1.44414 | 1.45388  | 3.79337 |
| H | -0.2836  | 0.12151  | 4.23986 |

Zero-point correction = 0.758058

Thermal correction to Enthalpy = 0.821583

Thermal correction to Gibbs Free Energy = 0.657753

## IM2S

|    |          |          |          |
|----|----------|----------|----------|
| La | 0.0632   | -0.005   | 0.51728  |
| Si | 3.08066  | -0.93858 | -1.33939 |
| Si | 3.15687  | -1.53443 | 1.6088   |
| O  | -1.89985 | 3.67551  | -1.60639 |
| O  | -3.19309 | -0.55963 | -2.83531 |
| N  | -0.41837 | 2.23305  | -0.69177 |
| N  | -1.44071 | -0.79387 | -1.42611 |
| N  | 2.33482  | -0.88408 | 0.22907  |
| C  | -1.51474 | 2.3803   | -1.42391 |
| C  | -2.36198 | 1.44433  | -2.02477 |
| H  | -3.19978 | 1.85673  | -2.56891 |
| C  | -2.26727 | 0.04884  | -2.03506 |
| C  | -0.8718  | 4.52451  | -1.06924 |
| H  | -1.34842 | 5.30149  | -0.47169 |
| H  | -0.34895 | 4.99232  | -1.9066  |
| C  | 0.02179  | 3.57597  | -0.24809 |
| H  | -0.22738 | 3.68968  | 0.81767  |
| C  | 1.54564  | 3.85136  | -0.36892 |
| C  | 1.8069   | 5.30018  | 0.08062  |
| H  | 2.87796  | 5.52078  | 0.06431  |
| H  | 1.45094  | 5.47329  | 1.10181  |
| H  | 1.31776  | 6.02967  | -0.57138 |
| C  | 2.30733  | 2.90555  | 0.57254  |
| H  | 2.27768  | 1.86966  | 0.22573  |
| H  | 1.91811  | 2.95234  | 1.59561  |
| H  | 3.36755  | 3.16873  | 0.62141  |
| C  | 2.05376  | 3.64542  | -1.8027  |
| H  | 1.82669  | 2.641    | -2.16338 |
| H  | 3.13822  | 3.7808   | -1.84575 |
| H  | 1.61326  | 4.35586  | -2.50687 |
| C  | -3.10871 | -1.9705  | -2.56643 |
| H  | -3.299   | -2.50479 | -3.4958  |
| H  | -3.87605 | -2.22758 | -1.82852 |
| C  | -1.68771 | -2.13143 | -2.02734 |
| H  | -1.01052 | -2.24647 | -2.88765 |
| C  | -1.45418 | -3.35667 | -1.11072 |
| C  | -2.1109  | -3.18111 | 0.26392  |
| H  | -2.0218  | -4.09925 | 0.8517   |
| H  | -3.16918 | -2.92584 | 0.1973   |
| H  | -1.6443  | -2.38473 | 0.85178  |
| C  | 0.05727  | -3.57691 | -0.94304 |
| H  | 0.26331  | -4.39076 | -0.24221 |
| H  | 0.58243  | -2.69125 | -0.5741  |
| H  | 0.52406  | -3.83695 | -1.89719 |
| C  | -2.04756 | -4.60035 | -1.79947 |
| H  | -1.78089 | -5.50607 | -1.24719 |
| H  | -1.66485 | -4.71315 | -2.81881 |
| H  | -3.13922 | -4.56207 | -1.85193 |

---

|   |          |          |          |
|---|----------|----------|----------|
| C | 4.50723  | 0.29304  | -1.53187 |
| H | 4.20109  | 1.30993  | -1.26701 |
| H | 4.86052  | 0.32221  | -2.56933 |
| H | 5.36705  | 0.04032  | -0.90535 |
| C | 3.7597   | -2.65389 | -1.7783  |
| H | 4.16525  | -2.66102 | -2.79685 |
| H | 2.97951  | -3.42023 | -1.73471 |
| H | 4.5677   | -2.97368 | -1.11288 |
| C | 1.83731  | -0.50854 | -2.70346 |
| H | 2.34799  | -0.54301 | -3.67258 |
| H | 1.4044   | 0.4929   | -2.61898 |
| H | 1.00311  | -1.21223 | -2.75995 |
| C | 5.03352  | -1.28757 | 1.61635  |
| H | 5.29892  | -0.22658 | 1.57146  |
| H | 5.54411  | -1.79047 | 0.79011  |
| H | 5.45896  | -1.68766 | 2.54412  |
| C | 2.81744  | -3.38573 | 1.83097  |
| H | 1.75228  | -3.58248 | 1.99985  |
| H | 3.35859  | -3.79672 | 2.69117  |
| H | 3.11636  | -3.96277 | 0.95026  |
| C | 2.53646  | -0.68858 | 3.19194  |
| H | 2.68819  | 0.39646  | 3.1618   |
| H | 3.09629  | -1.0584  | 4.05811  |
| H | 1.48008  | -0.87376 | 3.41667  |
| H | -0.45019 | 2.25853  | 2.4991   |
| C | -4.48416 | 1.12893  | 1.29438  |
| C | -3.19433 | 1.23415  | 1.81291  |
| C | -2.57023 | 0.15608  | 2.49116  |
| C | -3.35583 | -1.01454 | 2.64986  |
| C | -4.64419 | -1.10955 | 2.14525  |
| C | -5.22251 | -0.04157 | 1.44946  |
| H | -4.911   | 1.97444  | 0.76278  |
| H | -2.65873 | 2.16995  | 1.68231  |
| H | -2.92745 | -1.86106 | 3.18121  |
| H | -5.20911 | -2.02583 | 2.29626  |
| H | -6.22779 | -0.12025 | 1.04866  |
| C | -1.16887 | 0.19605  | 2.91565  |
| H | -0.95653 | -0.56531 | 3.67178  |
| C | -0.61472 | 1.55502  | 3.33525  |
| H | -1.2729  | 2.10434  | 4.02575  |
| H | 0.35311  | 1.44654  | 3.83372  |

Zero-point correction = 0.764554

Thermal correction to Enthalpy = 0.828034

Thermal correction to Gibbs Free Energy = 0.663746

### IM3S

|    |          |          |          |
|----|----------|----------|----------|
| La | -0.79843 | -0.01317 | -0.45913 |
| Si | -2.15568 | 2.63777  | 1.75609  |
| Si | 0.23345  | 3.41375  | 0.11394  |
| O  | -0.98889 | -4.11311 | 1.90516  |
| O  | -4.92705 | -2.29731 | 0.28814  |
| N  | -0.62156 | -2.02874 | 1.12383  |
| N  | -3.20676 | -0.93431 | -0.25457 |
| N  | -0.92812 | 2.23057  | 0.60016  |
| C  | -1.48586 | -3.01596 | 1.26867  |
| C  | -2.83323 | -3.09601 | 0.90145  |
| H  | -3.37262 | -3.9777  | 1.21644  |
| C  | -3.58193 | -2.081   | 0.30215  |
| C  | 0.43069  | -3.91534 | 2.05907  |
| H  | 0.94601  | -4.54461 | 1.32927  |
| H  | 0.70399  | -4.24088 | 3.06145  |
| C  | 0.64492  | -2.41621 | 1.78307  |
| H  | 1.47085  | -2.29273 | 1.07512  |
| C  | 0.98375  | -1.55463 | 3.0344   |
| C  | 2.35095  | -1.99942 | 3.58078  |
| H  | 2.64822  | -1.37721 | 4.43046  |
| H  | 3.13057  | -1.9128  | 2.8169   |
| H  | 2.34123  | -3.03598 | 3.9294   |
| C  | 1.08869  | -0.08546 | 2.60404  |
| H  | 0.12737  | 0.32018  | 2.28436  |
| H  | 1.81813  | 0.04148  | 1.79537  |
| H  | 1.42061  | 0.54643  | 3.43285  |
| C  | -0.09682 | -1.68921 | 4.11639  |
| H  | -1.08339 | -1.43686 | 3.72147  |
| H  | 0.10996  | -1.01586 | 4.95383  |
| H  | -0.1511  | -2.70289 | 4.52271  |
| C  | -5.55643 | -1.05526 | -0.06678 |

|    |          |          |          |
|----|----------|----------|----------|
| H  | -5.94852 | -0.59616 | 0.84552  |
| H  | -6.38839 | -1.28326 | -0.72994 |
| C  | -4.42843 | -0.21346 | -0.69592 |
| H  | -4.42994 | 0.78498  | -0.24711 |
| C  | -4.5524  | -0.0153  | -2.23764 |
| C  | -4.52224 | -1.36219 | -2.97264 |
| H  | -4.56068 | -1.21229 | -4.05565 |
| H  | -5.36837 | -1.99942 | -2.70131 |
| C  | -3.39921 | 0.86575  | -2.74339 |
| H  | -3.56503 | 1.16267  | -3.7827  |
| H  | -2.44322 | 0.33323  | -2.7465  |
| H  | -3.30061 | 1.78709  | -2.15837 |
| C  | -5.86923 | 0.7257   | -2.53484 |
| H  | -5.95141 | 0.94324  | -3.60355 |
| H  | -5.92121 | 1.68009  | -2.00036 |
| H  | -6.75194 | 0.14283  | -2.26085 |
| C  | -2.8343  | 1.09659  | 2.62261  |
| H  | -3.69271 | 1.36706  | 3.2483   |
| H  | -2.08849 | 0.65294  | 3.28972  |
| H  | -3.1713  | 0.308    | 1.94438  |
| C  | -1.56305 | 3.76465  | 3.16164  |
| H  | -2.37178 | 3.91605  | 3.8864   |
| H  | -1.25425 | 4.75779  | 2.82135  |
| H  | -0.72043 | 3.324    | 3.70431  |
| C  | -3.61921 | 3.52773  | 0.93972  |
| H  | -4.43773 | 3.70514  | 1.64717  |
| H  | -4.03267 | 2.95527  | 0.10271  |
| H  | -3.32017 | 4.50159  | 0.53853  |
| C  | 1.53158  | 3.77789  | 1.44494  |
| H  | 1.96768  | 2.85344  | 1.83623  |
| H  | 1.10467  | 4.31287  | 2.2973   |
| H  | 2.34922  | 4.39628  | 1.05773  |
| C  | -0.5068  | 5.07493  | -0.41461 |
| H  | -1.23852 | 4.95654  | -1.22093 |
| H  | 0.27392  | 5.75251  | -0.78012 |
| H  | -1.01125 | 5.58947  | 0.40932  |
| C  | 1.18134  | 2.76304  | -1.39773 |
| H  | 1.77309  | 1.86042  | -1.21138 |
| H  | 1.89766  | 3.51614  | -1.74413 |
| H  | 0.51767  | 2.57261  | -2.2466  |
| H  | -3.60661 | -1.91378 | -2.74516 |
| H  | 6.85245  | -1.07963 | -2.91296 |
| C  | 3.08301  | -2.89916 | -1.1043  |
| C  | 1.82397  | -3.45887 | -1.33947 |
| C  | 0.82778  | -2.73168 | -1.97835 |
| C  | 1.04017  | -1.4067  | -2.45453 |
| C  | 2.33212  | -0.8649  | -2.19597 |
| C  | 3.31884  | -1.59342 | -1.53592 |
| H  | 1.61404  | -4.4766  | -1.02315 |
| H  | -0.13805 | -3.19962 | -2.15389 |
| H  | 2.57081  | 0.13353  | -2.54593 |
| H  | 4.28379  | -1.13085 | -1.36001 |
| C  | -0.05365 | -0.63656 | -3.02464 |
| C  | 0.25996  | 0.4016   | -4.0945  |
| H  | 0.64116  | -0.05047 | -5.02376 |
| H  | -0.63363 | 0.97445  | -4.36677 |
| H  | 1.01045  | 1.13168  | -3.78167 |
| Si | 7.50347  | -0.08591 | -2.02027 |
| H  | 7.89221  | 1.08965  | -2.83948 |
| C  | 6.3432   | 0.45092  | -0.64206 |
| C  | 6.33029  | -0.22252 | 0.59049  |
| C  | 5.44236  | 1.51309  | -0.82405 |
| C  | 5.44934  | 0.15029  | 1.60421  |
| H  | 7.01791  | -1.04492 | 0.76814  |
| C  | 4.56015  | 1.88849  | 0.18758  |
| H  | 5.42535  | 2.05967  | -1.76329 |
| C  | 4.56401  | 1.20835  | 1.40457  |
| H  | 5.45844  | -0.37923 | 2.55162  |
| H  | 3.87413  | 2.71296  | 0.03045  |
| H  | 3.8873   | 1.50764  | 2.19749  |
| H  | 8.71536  | -0.71072 | -1.43242 |
| H  | -0.85938 | -1.3023  | -3.35822 |
| H  | 3.85889  | -3.46468 | -0.59916 |

Zero-point correction = 0.880115

Thermal correction to Enthalpy = 0.956272

Thermal correction to Gibbs Free Energy = 0.761600

---

**TS3S**

|    |          |          |          |
|----|----------|----------|----------|
| La | 0.32162  | 0.09048  | -0.39062 |
| Si | 3.65008  | -1.09499 | 0.61981  |
| Si | 3.0326   | -1.40153 | -2.2903  |
| O  | -2.14291 | -0.28006 | 3.50276  |
| O  | 1.15208  | 2.96159  | 3.23413  |
| N  | -0.80249 | -0.66798 | 1.72856  |
| N  | 1.06846  | 1.81635  | 1.29146  |
| N  | 2.55535  | -0.82342 | -0.71571 |
| C  | -1.10925 | 0.15123  | 2.73351  |
| C  | -0.52381 | 1.35267  | 3.12739  |
| H  | -0.87894 | 1.7882   | 4.05025  |
| C  | 0.54931  | 1.99561  | 2.49837  |
| C  | -2.72291 | -1.42265 | 2.8362   |
| H  | -3.60888 | -1.08884 | 2.29115  |
| H  | -3.01946 | -2.13415 | 3.60344  |
| C  | -1.61624 | -1.90228 | 1.8882   |
| H  | -2.05201 | -2.17769 | 0.92485  |
| C  | -0.8056  | -3.13278 | 2.39941  |
| C  | -1.74813 | -4.34818 | 2.46792  |
| H  | -1.19357 | -5.24434 | 2.76111  |
| H  | -2.21175 | -4.54906 | 1.49752  |
| H  | -2.55016 | -4.21604 | 3.19914  |
| C  | 0.31414  | -3.44974 | 1.39792  |
| H  | 1.04722  | -2.64496 | 1.34583  |
| H  | -0.08434 | -3.62139 | 0.3928   |
| H  | 0.85625  | -4.35294 | 1.69096  |
| C  | -0.19339 | -2.87095 | 3.78356  |
| H  | 0.46712  | -2.00194 | 3.77583  |
| H  | 0.40015  | -3.73195 | 4.1053   |
| H  | -0.95705 | -2.70001 | 4.54677  |
| C  | 2.34818  | 3.3648   | 2.54267  |
| H  | 3.20761  | 2.98383  | 3.0995   |
| H  | 2.38222  | 4.45263  | 2.55052  |
| C  | 2.22938  | 2.73198  | 1.1391   |
| H  | 3.11952  | 2.1321   | 0.92971  |
| C  | 2.10393  | 3.76568  | -0.01999 |
| C  | 0.85732  | 4.64479  | 0.14695  |
| H  | 0.76398  | 5.34413  | -0.68828 |
| H  | 0.89289  | 5.23932  | 1.06348  |
| C  | 2.03652  | 3.0263   | -1.36404 |
| H  | 2.07692  | 3.72468  | -2.20339 |
| H  | 1.08628  | 2.49483  | -1.48451 |
| H  | 2.85657  | 2.31306  | -1.48151 |
| C  | 3.37537  | 4.63488  | -0.03639 |
| H  | 3.34632  | 5.33679  | -0.87445 |
| H  | 4.27708  | 4.024    | -0.14961 |
| H  | 3.48834  | 5.22977  | 0.87327  |
| C  | 2.90165  | -0.66065 | 2.30944  |
| H  | 3.03087  | 0.39541  | 2.55357  |
| H  | 3.43891  | -1.22946 | 3.07724  |
| H  | 1.84251  | -0.88503 | 2.43809  |
| C  | 4.19895  | -2.90672 | 0.74347  |
| H  | 4.85293  | -3.04883 | 1.61167  |
| H  | 4.75829  | -3.24588 | -0.13331 |
| H  | 3.34526  | -3.58052 | 0.86682  |
| C  | 5.22793  | -0.04547 | 0.51628  |
| H  | 5.71719  | 0.00389  | 1.49643  |
| H  | 5.01478  | 0.98409  | 0.21039  |
| H  | 5.96211  | -0.44379 | -0.18795 |
| C  | 2.52395  | -3.21055 | -2.54057 |
| H  | 1.46284  | -3.369   | -2.31765 |
| H  | 3.08745  | -3.88355 | -1.88715 |
| H  | 2.69067  | -3.54039 | -3.5724  |
| C  | 4.88479  | -1.29042 | -2.66577 |
| H  | 5.26091  | -0.2651  | -2.59586 |
| H  | 5.06089  | -1.63078 | -3.69283 |
| H  | 5.50316  | -1.91577 | -2.01672 |
| C  | 2.20378  | -0.41501 | -3.68166 |
| H  | 1.14684  | -0.63841 | -3.84686 |
| H  | 2.70583  | -0.65962 | -4.62469 |
| H  | 2.29475  | 0.66886  | -3.55331 |
| H  | -0.05309 | 4.04326  | 0.17974  |
| H  | -0.34368 | 0.86463  | -2.88547 |
| C  | -6.13666 | 1.40481  | 0.15611  |
| C  | -5.03521 | 1.14679  | 0.97819  |
| C  | -3.74612 | 1.41035  | 0.53608  |

|    |          |          |          |
|----|----------|----------|----------|
| C  | -3.48239 | 1.94312  | -0.74881 |
| C  | -4.61621 | 2.24208  | -1.54067 |
| C  | -5.90916 | 1.96387  | -1.10077 |
| H  | -7.146   | 1.20114  | 0.49912  |
| H  | -5.18491 | 0.75493  | 1.98083  |
| H  | -2.91212 | 1.21514  | 1.20278  |
| H  | -4.4853  | 2.69151  | -2.51825 |
| H  | -6.75063 | 2.1984   | -1.74748 |
| C  | -2.1076  | 2.11044  | -1.2333  |
| C  | -1.83541 | 3.35063  | -2.0838  |
| H  | -2.04973 | 4.287    | -1.54868 |
| H  | -0.78813 | 3.40113  | -2.40223 |
| H  | -2.43216 | 3.37939  | -3.00042 |
| Si | -1.77347 | 0.45415  | -3.20434 |
| H  | -1.40487 | -0.14803 | -4.55449 |
| C  | -2.2264  | -1.15337 | -2.30206 |
| C  | -3.4341  | -1.32479 | -1.60056 |
| C  | -1.39243 | -2.28119 | -2.45042 |
| C  | -3.796   | -2.57027 | -1.08836 |
| H  | -4.10599 | -0.48674 | -1.46787 |
| C  | -1.73865 | -3.52173 | -1.91216 |
| H  | -0.48406 | -2.20768 | -3.0446  |
| C  | -2.9504  | -3.66958 | -1.23922 |
| H  | -4.74247 | -2.67903 | -0.56833 |
| H  | -1.078   | -4.37268 | -2.04395 |
| H  | -3.23687 | -4.63699 | -0.84008 |
| H  | -2.89928 | 1.32575  | -3.601   |
| H  | -1.44994 | 2.17967  | -0.35057 |

Zero-point correction = 0.881737

Thermal correction to Enthalpy = 0.955629

Thermal correction to Gibbs Free Energy = 0.771053

#### PRODS

|    |          |          |          |
|----|----------|----------|----------|
| La | 1.0408   | -0.22978 | -0.61783 |
| Si | 4.37259  | -0.56133 | 0.90475  |
| Si | 4.34417  | -0.47584 | -2.11377 |
| O  | -1.78427 | -1.19574 | 3.104    |
| O  | 0.76404  | 2.69554  | 3.10101  |
| N  | -0.47592 | -1.1096  | 1.26553  |
| N  | 0.87624  | 1.66064  | 1.0977   |
| N  | 3.50363  | -0.46741 | -0.59779 |
| C  | -0.82223 | -0.52795 | 2.40362  |
| C  | -0.36364 | 0.65707  | 2.98371  |
| H  | -0.71365 | 0.8907   | 3.97859  |
| C  | 0.42651  | 1.61505  | 2.34516  |
| C  | -2.33356 | -2.18804 | 2.20959  |
| H  | -3.24964 | -1.78418 | 1.77298  |
| H  | -2.5744  | -3.07089 | 2.79822  |
| C  | -1.23823 | -2.38075 | 1.15105  |
| H  | -1.69283 | -2.44537 | 0.15836  |
| C  | -0.35997 | -3.65567 | 1.35124  |
| C  | -1.22849 | -4.90415 | 1.11915  |
| H  | -0.63607 | -5.81273 | 1.26195  |
| H  | -1.63055 | -4.92484 | 0.1034   |
| H  | -2.07274 | -4.95832 | 1.81142  |
| C  | 0.76698  | -3.66851 | 0.30735  |
| H  | 1.5101   | -2.89049 | 0.50235  |
| H  | 0.37527  | -3.55813 | -0.71145 |
| H  | 1.31658  | -4.61339 | 0.33262  |
| C  | 0.25297  | -3.69783 | 2.75902  |
| H  | 0.81795  | -2.79029 | 2.97814  |
| H  | 0.93768  | -4.54629 | 2.85368  |
| H  | -0.50892 | -3.809   | 3.53456  |
| C  | 1.72378  | 3.46035  | 2.34472  |
| H  | 2.72118  | 3.23604  | 2.73367  |
| H  | 1.51008  | 4.51519  | 2.50616  |
| C  | 1.54361  | 2.96813  | 0.89951  |
| H  | 2.52403  | 2.8088   | 0.43665  |
| C  | 0.74463  | 3.92697  | -0.03219 |
| C  | -0.64526 | 4.23326  | 0.54409  |
| H  | -1.20414 | 4.88852  | -0.12966 |
| H  | -0.58654 | 4.73966  | 1.51104  |
| C  | 0.59298  | 3.26633  | -1.40957 |
| H  | 0.11343  | 3.94249  | -2.12178 |
| H  | -0.0385  | 2.37338  | -1.37818 |
| H  | 1.56649  | 2.99649  | -1.8369  |
| C  | 1.54411  | 5.22918  | -0.2081  |

---

|    |          |          |          |
|----|----------|----------|----------|
| H  | 1.04008  | 5.89805  | -0.91152 |
| H  | 2.54794  | 5.03472  | -0.60044 |
| H  | 1.65486  | 5.77714  | 0.73138  |
| C  | 3.24422  | -1.12101 | 2.3194   |
| H  | 2.36672  | -0.48616 | 2.47834  |
| H  | 3.80661  | -1.09951 | 3.2601   |
| H  | 2.90031  | -2.15096 | 2.18946  |
| C  | 5.81186  | -1.79532 | 0.87587  |
| H  | 6.26156  | -1.88054 | 1.87208  |
| H  | 6.61296  | -1.50235 | 0.19006  |
| H  | 5.48051  | -2.79709 | 0.58329  |
| C  | 5.08589  | 1.11322  | 1.43219  |
| H  | 5.67256  | 1.02407  | 2.35406  |
| H  | 4.28939  | 1.83847  | 1.62939  |
| H  | 5.73956  | 1.54622  | 0.66911  |
| C  | 4.99986  | -2.18272 | -2.60821 |
| H  | 4.20765  | -2.93962 | -2.57654 |
| H  | 5.80368  | -2.52984 | -1.95299 |
| H  | 5.39591  | -2.17258 | -3.63062 |
| C  | 5.79984  | 0.73579  | -2.18782 |
| H  | 5.48374  | 1.76067  | -1.96571 |
| H  | 6.24839  | 0.74394  | -3.18795 |
| H  | 6.59808  | 0.48257  | -1.48307 |
| C  | 3.16517  | 0.04037  | -3.51016 |
| H  | 2.33407  | -0.65171 | -3.68717 |
| H  | 3.72493  | 0.07981  | -4.45188 |
| H  | 2.73116  | 1.03897  | -3.37843 |
| H  | -1.23268 | 3.32371  | 0.68379  |
| H  | -0.19724 | -0.15584 | -2.5496  |
| C  | -5.29221 | 1.58907  | 2.02843  |
| C  | -3.98424 | 1.11797  | 1.93194  |
| C  | -3.29485 | 1.21754  | 0.72498  |
| C  | -3.88675 | 1.78717  | -0.40888 |
| C  | -5.20115 | 2.26386  | -0.29321 |
| C  | -5.89562 | 2.16601  | 0.91093  |
| H  | -3.4934  | 0.66995  | 2.78869  |
| H  | -2.27945 | 0.84275  | 0.66253  |
| H  | -5.69206 | 2.70814  | -1.15306 |
| H  | -6.9128  | 2.54066  | 0.97527  |
| C  | -3.13525 | 1.8281   | -1.7215  |
| C  | -3.14878 | 3.20531  | -2.41023 |
| H  | -2.79069 | 3.98302  | -1.72938 |
| H  | -2.50308 | 3.21044  | -3.29295 |
| H  | -4.15039 | 3.49688  | -2.73823 |
| Si | -3.78507 | 0.47325  | -2.89722 |
| H  | -2.95538 | 0.41214  | -4.12629 |
| C  | -3.83595 | -1.23712 | -2.11345 |
| C  | -4.7102  | -1.52316 | -1.05056 |
| C  | -3.03978 | -2.28168 | -2.61201 |
| C  | -4.79476 | -2.80718 | -0.51482 |
| H  | -5.33515 | -0.73902 | -0.63425 |
| C  | -3.12691 | -3.56878 | -2.08198 |
| H  | -2.34533 | -2.08868 | -3.42371 |
| C  | -4.00862 | -3.8344  | -1.03497 |
| H  | -5.47955 | -3.00668 | 0.30368  |
| H  | -2.51025 | -4.3644  | -2.48928 |
| H  | -4.08053 | -4.83611 | -0.624   |
| H  | -5.17172 | 0.86214  | -3.27944 |
| H  | -2.09305 | 1.55552  | -1.52684 |
| H  | -5.83354 | 1.51362  | 2.96622  |

Zero-point correction = 0.880979

Thermal correction to Enthalpy = 0.955646

Thermal correction to Gibbs Free Energy = 0.764716

#### TS2R

|    |          |          |          |
|----|----------|----------|----------|
| La | 0.16434  | -0.06271 | -0.41704 |
| Si | 1.26351  | 2.75104  | 1.67146  |
| Si | -0.67536 | 3.42919  | -0.54594 |
| O  | 3.12596  | -3.64987 | -0.57913 |
| O  | -0.05234 | -3.66788 | 2.72962  |
| N  | 2.2517   | -1.56895 | -0.43648 |
| N  | -0.28301 | -1.71732 | 1.59928  |
| N  | 0.2719   | 2.27744  | 0.33164  |
| C  | 2.19653  | -2.82508 | -0.01759 |
| C  | 1.35019  | -3.45887 | 0.89883  |
| H  | 1.59146  | -4.48813 | 1.12451  |
| C  | 0.34269  | -2.88446 | 1.68181  |

|   |          |          |          |
|---|----------|----------|----------|
| C | 4.03953  | -2.83108 | -1.33013 |
| H | 4.23436  | -3.3242  | -2.28216 |
| H | 4.97331  | -2.76463 | -0.76576 |
| C | 3.31464  | -1.48113 | -1.46861 |
| H | 2.82857  | -1.43088 | -2.45162 |
| C | 4.2347   | -0.23563 | -1.3678  |
| C | 5.3228   | -0.35963 | -2.45029 |
| H | 5.95914  | 0.52992  | -2.46068 |
| H | 4.88425  | -0.46319 | -3.44822 |
| H | 5.97624  | -1.22054 | -2.28134 |
| C | 3.40822  | 1.02682  | -1.65604 |
| H | 2.70055  | 1.25274  | -0.85294 |
| H | 2.8492   | 0.93931  | -2.59194 |
| H | 4.05114  | 1.90805  | -1.73536 |
| C | 4.88597  | -0.11103 | 0.01682  |
| H | 4.13404  | -0.07692 | 0.80735  |
| H | 5.48044  | 0.80528  | 0.07845  |
| H | 5.55701  | -0.94527 | 0.23794  |
| C | -1.17739 | -3.0183  | 3.34168  |
| H | -1.09455 | -3.14013 | 4.42057  |
| H | -2.09138 | -3.5084  | 2.99121  |
| C | -1.05532 | -1.56661 | 2.86629  |
| H | -0.4239  | -1.022   | 3.58337  |
| C | -2.40324 | -0.80438 | 2.79241  |
| C | -3.29081 | -1.32088 | 1.6558   |
| H | -4.24102 | -0.78071 | 1.62986  |
| H | -3.52061 | -2.38459 | 1.75472  |
| H | -2.81844 | -1.18942 | 0.68206  |
| C | -2.14396 | 0.69621  | 2.60035  |
| H | -3.08489 | 1.24909  | 2.53212  |
| H | -1.5737  | 0.92665  | 1.69733  |
| H | -1.57684 | 1.11285  | 3.43717  |
| C | -3.13324 | -0.98719 | 4.13757  |
| H | -4.03668 | -0.37133 | 4.16762  |
| H | -2.50252 | -0.68442 | 4.97963  |
| H | -3.44314 | -2.02235 | 4.30503  |
| C | 2.86531  | 3.62494  | 1.16355  |
| H | 3.52232  | 2.97356  | 0.58011  |
| H | 3.43105  | 3.94758  | 2.0456   |
| H | 2.67497  | 4.51571  | 0.5575   |
| C | 0.38893  | 3.90892  | 2.89051  |
| H | 1.01448  | 4.08094  | 3.77414  |
| H | -0.56384 | 3.49785  | 3.23837  |
| H | 0.18078  | 4.89115  | 2.45408  |
| C | 1.79272  | 1.22791  | 2.67222  |
| H | 2.4797   | 1.53369  | 3.46935  |
| H | 2.32673  | 0.46396  | 2.09537  |
| H | 0.94764  | 0.73195  | 3.15836  |
| C | 0.26729  | 4.9874   | -1.06119 |
| H | 1.16281  | 4.74721  | -1.64369 |
| H | 0.58453  | 5.59001  | -0.20422 |
| H | -0.36437 | 5.63069  | -1.68504 |
| C | -2.22843 | 3.98945  | 0.3824   |
| H | -2.84969 | 3.13613  | 0.67514  |
| H | -2.85022 | 4.63982  | -0.2443  |
| H | -1.99469 | 4.54529  | 1.29503  |
| C | -1.31822 | 2.63546  | -2.14693 |
| H | -0.52947 | 2.24724  | -2.8012  |
| H | -1.85911 | 3.38734  | -2.73258 |
| H | -2.04611 | 1.83219  | -1.98062 |
| H | 0.45157  | -0.39924 | -2.67212 |
| C | -1.70804 | -1.97269 | -2.08739 |
| C | -0.62263 | -1.84715 | -2.9297  |
| H | 0.22778  | -2.50686 | -2.79996 |
| H | -0.7344  | -1.45524 | -3.93196 |
| H | -1.64375 | -2.68046 | -1.26284 |
| C | -3.01068 | -1.34828 | -2.32127 |
| C | -4.15067 | -1.79334 | -1.62013 |
| C | -3.19137 | -0.29217 | -3.23947 |
| C | -5.39891 | -1.21675 | -1.82332 |
| H | -4.04886 | -2.61226 | -0.9149  |
| C | -4.44276 | 0.28257  | -3.44145 |
| H | -2.34204 | 0.09234  | -3.79352 |
| C | -5.55612 | -0.17061 | -2.73438 |
| H | -6.25588 | -1.58795 | -1.26904 |
| H | -4.54512 | 1.09674  | -4.15264 |
| H | -6.52976 | 0.28191  | -2.8915  |

---

Zero-point correction = 0.757565  
Thermal correction to Enthalpy = 0.820354  
Thermal correction to Gibbs Free Energy = 0.659138

**IM2R**

|    |          |          |          |
|----|----------|----------|----------|
| La | 0.0507   | -0.14865 | 0.51654  |
| Si | 1.99676  | 2.1716   | -1.55914 |
| Si | 1.97589  | 2.82963  | 1.37701  |
| O  | -3.31444 | -1.96602 | -2.06854 |
| O  | 0.72968  | -4.1392  | -1.7611  |
| N  | -1.81281 | -0.49758 | -1.23977 |
| N  | 1.00765  | -2.10816 | -0.80287 |
| N  | 1.47221  | 1.81392  | 0.06235  |
| C  | -2.03964 | -1.73134 | -1.65134 |
| C  | -1.19838 | -2.85633 | -1.70425 |
| H  | -1.64569 | -3.7529  | -2.11028 |
| C  | 0.1602   | -2.95351 | -1.39069 |
| C  | -4.01651 | -0.7069  | -2.06043 |
| H  | -4.98931 | -0.86407 | -1.59509 |
| H  | -4.16166 | -0.39669 | -3.0982  |
| C  | -3.09932 | 0.23488  | -1.26108 |
| H  | -3.47412 | 0.29316  | -0.23255 |
| C  | -3.01389 | 1.6901   | -1.78354 |
| C  | -4.43558 | 2.27977  | -1.78481 |
| H  | -4.41727 | 3.33117  | -2.08619 |
| H  | -4.88892 | 2.22751  | -0.78959 |
| H  | -5.09729 | 1.75541  | -2.48071 |
| C  | -2.14725 | 2.50734  | -0.81313 |
| H  | -1.09632 | 2.2072   | -0.83854 |
| H  | -2.51366 | 2.42152  | 0.21596  |
| H  | -2.15847 | 3.57005  | -1.07095 |
| C  | -2.41086 | 1.76433  | -3.19258 |
| H  | -1.41931 | 1.30993  | -3.22521 |
| H  | -2.31506 | 2.80559  | -3.51361 |
| H  | -3.03129 | 1.25534  | -3.93521 |
| C  | 2.04944  | -4.16196 | -1.19074 |
| H  | 2.70858  | -4.67926 | -1.88545 |
| H  | 2.00904  | -4.71189 | -0.2439  |
| C  | 2.36964  | -2.67847 | -1.00417 |
| H  | 2.75523  | -2.29741 | -1.96131 |
| C  | 3.44934  | -2.36758 | 0.06689  |
| C  | 2.90854  | -2.50877 | 1.49533  |
| H  | 3.72159  | -2.42647 | 2.22215  |
| H  | 2.40847  | -3.46441 | 1.66293  |
| H  | 2.18937  | -1.7221  | 1.74769  |
| C  | 4.00131  | -0.94718 | -0.13599 |
| H  | 4.77037  | -0.72184 | 0.60882  |
| H  | 3.23854  | -0.17197 | -0.04794 |
| H  | 4.45853  | -0.84187 | -1.12364 |
| C  | 4.61748  | -3.35498 | -0.13149 |
| H  | 5.4585   | -3.08172 | 0.51186  |
| H  | 4.97873  | -3.3419  | -1.16465 |
| H  | 4.34229  | -4.38367 | 0.11634  |
| C  | 1.13096  | 3.66738  | -2.33793 |
| H  | 0.06113  | 3.49348  | -2.48242 |
| H  | 1.55616  | 3.87833  | -3.32655 |
| H  | 1.23637  | 4.57695  | -1.74091 |
| C  | 3.85928  | 2.50855  | -1.6823  |
| H  | 4.15694  | 2.63491  | -2.72987 |
| H  | 4.45247  | 1.68529  | -1.27409 |
| H  | 4.15945  | 3.42006  | -1.15594 |
| C  | 1.64868  | 0.72051  | -2.72872 |
| H  | 1.90597  | 1.01914  | -3.75169 |
| H  | 0.60313  | 0.39983  | -2.75616 |
| H  | 2.24852  | -0.16216 | -2.49626 |
| C  | 2.0595   | 4.67875  | 0.98084  |
| H  | 1.09036  | 5.06946  | 0.65514  |
| H  | 2.79101  | 4.92267  | 0.20509  |
| H  | 2.34858  | 5.23859  | 1.87804  |
| C  | 3.66554  | 2.31733  | 2.06487  |
| H  | 3.65217  | 1.28478  | 2.43269  |
| H  | 3.97425  | 2.95298  | 2.90298  |
| H  | 4.44945  | 2.37712  | 1.30359  |
| C  | 0.74231  | 2.67629  | 2.81377  |
| H  | -0.27747 | 2.93793  | 2.51005  |
| H  | 1.01433  | 3.3692   | 3.61771  |
| H  | 0.71546  | 1.68329  | 3.27459  |



---

|   |          |          |         |
|---|----------|----------|---------|
| C | -0.23349 | -2.53382 | 3.18023 |
| C | -0.6072  | -1.06488 | 2.99742 |
| H | -0.19067 | -0.43617 | 3.78973 |
| C | -2.00602 | -0.75791 | 2.74694 |
| C | -2.90077 | -1.68303 | 2.14054 |
| C | -2.53691 | 0.54073  | 2.99625 |
| C | -4.21774 | -1.34304 | 1.84373 |
| H | -2.55991 | -2.68891 | 1.91894 |
| C | -3.85378 | 0.87033  | 2.6975  |
| H | -1.9004  | 1.27865  | 3.47802 |
| C | -4.71455 | -0.06868 | 2.12126 |
| H | -4.86448 | -2.08897 | 1.3901  |
| H | -4.21683 | 1.86785  | 2.92988 |
| H | -5.74374 | 0.18824  | 1.89407 |
| H | 0.78724  | -2.62912 | 3.55896 |
| H | -0.89018 | -3.05877 | 3.89169 |
| H | -0.27009 | -3.12064 | 2.25177 |

Zero-point correction = 0.764734

Thermal correction to Enthalpy = 0.828289

Thermal correction to Gibbs Free Energy = 0.666269

### IM3R

|    |          |          |          |
|----|----------|----------|----------|
| La | -0.65795 | -0.06197 | -0.44627 |
| Si | 0.23027  | 2.09175  | 2.40198  |
| Si | 1.43744  | 2.93902  | -0.22248 |
| O  | -3.35882 | -3.51079 | 1.37438  |
| O  | -5.11749 | 0.77196  | 0.97549  |
| N  | -1.76234 | -2.06233 | 0.70931  |
| N  | -3.05643 | 0.70042  | 0.05731  |
| N  | 0.4493   | 1.85091  | 0.69608  |
| C  | -3.04181 | -2.23803 | 1.00519  |
| C  | -4.09722 | -1.32317 | 1.02791  |
| H  | -5.04215 | -1.67399 | 1.4172   |
| C  | -4.02071 | 0.02541  | 0.6656   |
| C  | -2.20998 | -4.33377 | 1.08796  |
| H  | -2.39349 | -4.86342 | 0.14802  |
| H  | -2.11456 | -5.06201 | 1.89131  |
| C  | -1.04724 | -3.33567 | 0.96073  |
| H  | -0.44489 | -3.58722 | 0.08488  |
| C  | -0.07759 | -3.28774 | 2.17972  |
| C  | 0.65727  | -4.63731 | 2.27006  |
| H  | 1.38264  | -4.62817 | 3.08908  |
| H  | 1.20183  | -4.85542 | 1.34612  |
| H  | -0.02711 | -5.46907 | 2.45734  |
| C  | 0.97856  | -2.19393 | 1.94725  |
| H  | 0.55248  | -1.18734 | 1.98635  |
| H  | 1.49697  | -2.33512 | 0.99262  |
| H  | 1.73854  | -2.22135 | 2.73236  |
| C  | -0.82816 | -3.00521 | 3.48845  |
| H  | -1.40541 | -2.08047 | 3.42705  |
| H  | -0.12642 | -2.90321 | 4.32175  |
| H  | -1.52201 | -3.80996 | 3.74521  |
| C  | -4.76143 | 2.1535   | 0.78155  |
| H  | -4.56231 | 2.59674  | 1.7616   |
| H  | -5.61743 | 2.65729  | 0.3369   |
| C  | -3.49928 | 2.10603  | -0.10035 |
| H  | -2.73    | 2.76746  | 0.31278  |
| C  | -3.72285 | 2.53685  | -1.582   |
| C  | -4.79975 | 1.67439  | -2.25477 |
| H  | -4.90484 | 1.94409  | -3.30988 |
| H  | -5.78093 | 1.7983   | -1.78868 |
| C  | -2.40424 | 2.39254  | -2.35629 |
| H  | -2.4933  | 2.80744  | -3.36414 |
| H  | -2.12644 | 1.34347  | -2.49251 |
| H  | -1.58857 | 2.9272   | -1.86093 |
| C  | -4.13053 | 4.02034  | -1.60912 |
| H  | -4.24626 | 4.36742  | -2.63992 |
| H  | -3.37306 | 4.65191  | -1.13312 |
| H  | -5.0813  | 4.20293  | -1.10142 |
| C  | -1.31045 | 1.18469  | 3.03495  |
| H  | -2.22869 | 1.55282  | 2.56998  |
| H  | -1.40726 | 1.34349  | 4.11505  |
| H  | -1.29326 | 0.10066  | 2.88851  |
| C  | 1.68804  | 1.44911  | 3.42927  |
| H  | 1.53551  | 1.64383  | 4.49752  |
| H  | 2.62986  | 1.92343  | 3.13962  |
| H  | 1.82178  | 0.36932  | 3.31426  |

---

|    |          |          |          |
|----|----------|----------|----------|
| C  | -0.01534 | 3.90377  | 2.90665  |
| H  | -0.23688 | 3.96765  | 3.97851  |
| H  | -0.85015 | 4.37122  | 2.3745   |
| H  | 0.8718   | 4.51954  | 2.73001  |
| C  | 3.15102  | 3.23093  | 0.51947  |
| H  | 3.68258  | 2.29226  | 0.68822  |
| H  | 3.10268  | 3.75636  | 1.47886  |
| H  | 3.76985  | 3.8424   | -0.14744 |
| C  | 0.66083  | 4.65021  | -0.48345 |
| H  | -0.36269 | 4.58819  | -0.86764 |
| H  | 1.24144  | 5.23305  | -1.20839 |
| H  | 0.6212   | 5.23492  | 0.43955  |
| C  | 1.71566  | 2.25281  | -1.97282 |
| H  | 2.17646  | 1.26076  | -1.98903 |
| H  | 2.40786  | 2.91171  | -2.50817 |
| H  | 0.80655  | 2.21421  | -2.58336 |
| H  | -4.54126 | 0.61364  | -2.20739 |
| H  | 4.16695  | 0.38532  | -3.10815 |
| C  | 1.59437  | -4.40825 | -1.7889  |
| C  | 0.27561  | -4.43723 | -2.25208 |
| C  | -0.36774 | -3.27891 | -2.67045 |
| C  | 0.28627  | -2.01417 | -2.66929 |
| C  | 1.62303  | -2.01429 | -2.17253 |
| C  | 2.25815  | -3.18138 | -1.75513 |
| H  | 2.09364  | -5.31798 | -1.47391 |
| H  | -0.25956 | -5.3823  | -2.29178 |
| H  | -1.38712 | -3.34855 | -3.03318 |
| H  | 2.18884  | -1.0849  | -2.19959 |
| H  | 3.29051  | -3.13786 | -1.41969 |
| C  | -0.37306 | -0.78086 | -3.05563 |
| C  | -1.64099 | -0.8931  | -3.89369 |
| H  | -1.94158 | 0.08249  | -4.28354 |
| H  | -1.52512 | -1.55814 | -4.76404 |
| H  | -2.50236 | -1.27767 | -3.33091 |
| Si | 5.49024  | 0.11231  | -2.49492 |
| H  | 6.47987  | 1.09568  | -3.00184 |
| C  | 5.40021  | 0.25018  | -0.62256 |
| C  | 4.44865  | -0.47119 | 0.11847  |
| C  | 6.29428  | 1.07216  | 0.08031  |
| C  | 4.39492  | -0.37804 | 1.50609  |
| H  | 3.73526  | -1.11484 | -0.38672 |
| C  | 6.24344  | 1.16787  | 1.47103  |
| H  | 7.03773  | 1.65194  | -0.4592  |
| C  | 5.29414  | 0.44243  | 2.18634  |
| H  | 3.6471   | -0.93799 | 2.05606  |
| H  | 6.94016  | 1.81575  | 1.99341  |
| H  | 5.24504  | 0.5227   | 3.26719  |
| H  | 5.90704  | -1.25224 | -2.90983 |
| H  | 0.336    | -0.05764 | -3.46984 |

Zero-point correction = 0.880899

Thermal correction to Enthalpy = 0.956419

Thermal correction to Gibbs Free Energy = 0.765614

### TS3R

|    |           |           |           |
|----|-----------|-----------|-----------|
| La | 0.133979  | 0.076768  | -0.203485 |
| Si | 1.322565  | -3.341406 | 0.179565  |
| Si | 1.893726  | -2.095343 | -2.498906 |
| O  | -1.498257 | 1.229283  | 3.996304  |
| O  | 3.086925  | 0.695039  | 3.428628  |
| N  | -1.035684 | 0.201294  | 2.039695  |
| N  | 2.012446  | 0.465724  | 1.457777  |
| N  | 1.206477  | -1.973459 | -0.902862 |
| C  | -0.547127 | 0.792235  | 3.130306  |
| C  | 0.774023  | 0.986288  | 3.529442  |
| H  | 0.937481  | 1.339935  | 4.537248  |
| C  | 1.905475  | 0.702664  | 2.758817  |
| C  | -2.764065 | 1.138186  | 3.305767  |
| H  | -2.991976 | 2.118536  | 2.876819  |
| H  | -3.524412 | 0.880099  | 4.039477  |
| C  | -2.508241 | 0.085240  | 2.223929  |
| H  | -3.015740 | 0.366673  | 1.296477  |
| C  | -2.982835 | -1.353073 | 2.589436  |
| C  | -4.521083 | -1.365371 | 2.609258  |
| H  | -4.892357 | -2.369501 | 2.833647  |
| H  | -4.932641 | -1.071016 | 1.639227  |
| H  | -4.934909 | -0.693186 | 3.366205  |
| C  | -2.498993 | -2.324607 | 1.506711  |

|    |           |           |           |
|----|-----------|-----------|-----------|
| H  | -1.419467 | -2.457238 | 1.553523  |
| H  | -2.776311 | -1.984768 | 0.505652  |
| H  | -2.944064 | -3.314597 | 1.638043  |
| C  | -2.434555 | -1.809084 | 3.950365  |
| H  | -1.342976 | -1.770368 | 3.976349  |
| H  | -2.730202 | -2.843925 | 4.148339  |
| H  | -2.810075 | -1.200293 | 4.776628  |
| C  | 4.078894  | 0.156080  | 2.531832  |
| H  | 4.241078  | -0.893455 | 2.792924  |
| H  | 5.004210  | 0.705076  | 2.691924  |
| C  | 3.453573  | 0.317670  | 1.136838  |
| H  | 3.593055  | -0.594283 | 0.549368  |
| C  | 4.033178  | 1.504757  | 0.308492  |
| C  | 3.907575  | 2.831959  | 1.070297  |
| H  | 4.273563  | 3.660495  | 0.457386  |
| H  | 4.489891  | 2.834783  | 1.995205  |
| C  | 3.282203  | 1.605147  | -1.026624 |
| H  | 3.740250  | 2.349669  | -1.682970 |
| H  | 2.248143  | 1.937957  | -0.897737 |
| H  | 3.301052  | 0.653732  | -1.562214 |
| C  | 5.511620  | 1.212310  | -0.003637 |
| H  | 5.937343  | 2.008826  | -0.620323 |
| H  | 5.627490  | 0.273183  | -0.554335 |
| H  | 6.122793  | 1.145218  | 0.900063  |
| C  | 1.297872  | -2.800683 | 1.998766  |
| H  | 2.254568  | -2.347820 | 2.274397  |
| H  | 1.167450  | -3.685488 | 2.632282  |
| H  | 0.523024  | -2.090880 | 2.296141  |
| C  | -0.090111 | -4.566520 | -0.123770 |
| H  | -0.132483 | -5.338028 | 0.653462  |
| H  | 0.039961  | -5.079616 | -1.082387 |
| H  | -1.067685 | -4.078422 | -0.155514 |
| C  | 2.927606  | -4.337252 | 0.031480  |
| H  | 2.936932  | -5.114463 | 0.804921  |
| H  | 3.817701  | -3.720047 | 0.185657  |
| H  | 3.040071  | -4.847578 | -0.929114 |
| C  | 1.277507  | -3.607801 | -3.454585 |
| H  | 0.185876  | -3.616240 | -3.538989 |
| H  | 1.575406  | -4.551211 | -2.987296 |
| H  | 1.681161  | -3.614523 | -4.473546 |
| C  | 3.789954  | -2.168778 | -2.491631 |
| H  | 4.229074  | -1.491139 | -1.753136 |
| H  | 4.191124  | -1.881849 | -3.470274 |
| H  | 4.167240  | -3.170450 | -2.271262 |
| C  | 1.457756  | -0.607127 | -3.591392 |
| H  | 0.395874  | -0.513783 | -3.833380 |
| H  | 1.966625  | -0.753105 | -4.551085 |
| H  | 1.798119  | 0.368518  | -3.228979 |
| H  | 2.869464  | 3.045288  | 1.334952  |
| H  | -0.605217 | 1.407074  | -2.336183 |
| C  | 0.657519  | 5.539149  | -1.752030 |
| C  | -0.678220 | 5.613977  | -2.158391 |
| C  | -1.622986 | 4.705207  | -1.698719 |
| C  | -1.278537 | 3.651472  | -0.809458 |
| C  | 0.079000  | 3.623084  | -0.391141 |
| C  | 1.021350  | 4.539449  | -0.851567 |
| H  | 1.388376  | 6.256762  | -2.109913 |
| H  | -0.989514 | 6.400898  | -2.840497 |
| H  | -2.651118 | 4.804888  | -2.027902 |
| H  | 0.378025  | 2.930729  | 0.397114  |
| H  | 2.040817  | 4.485642  | -0.483731 |
| C  | -2.214354 | 2.613860  | -0.429254 |
| C  | -3.681510 | 2.994074  | -0.306372 |
| H  | -4.245189 | 2.220849  | 0.224291  |
| H  | -3.831553 | 3.931790  | 0.251076  |
| H  | -4.178992 | 3.136041  | -1.274547 |
| Si | -2.073599 | 1.379713  | -2.765274 |
| H  | -1.759937 | 0.987935  | -4.197621 |
| C  | -2.935183 | -0.224688 | -2.209968 |
| C  | -4.191777 | -0.242867 | -1.577992 |
| C  | -2.369231 | -1.468336 | -2.551048 |
| C  | -4.855100 | -1.441078 | -1.319264 |
| H  | -4.673209 | 0.689674  | -1.310926 |
| C  | -3.011157 | -2.672858 | -2.257791 |
| H  | -1.426310 | -1.506877 | -3.087960 |
| C  | -4.263915 | -2.660783 | -1.650786 |
| H  | -5.836084 | -1.423827 | -0.854986 |

---

|   |           |           |           |
|---|-----------|-----------|-----------|
| H | -2.537498 | -3.613723 | -2.518777 |
| H | -4.776285 | -3.592779 | -1.435426 |
| H | -2.917291 | 2.575212  | -2.978633 |
| H | -1.883011 | 2.110791  | 0.484441  |

Zero-point correction = 0.881737

Thermal correction to Enthalpy = 0.955629

Thermal correction to Gibbs Free Energy = 0.771053

**PROD R**

|    |          |          |          |
|----|----------|----------|----------|
| La | 1.2512   | -0.00205 | 0.68261  |
| Si | 4.4678   | 0.4504   | -0.99899 |
| Si | 4.43017  | 0.91592  | 1.99435  |
| O  | -1.66203 | 0.82138  | -2.98849 |
| O  | 0.56202  | -3.26023 | -2.68149 |
| N  | -0.26122 | 0.8213   | -1.21982 |
| N  | 0.88943  | -2.0399  | -0.81265 |
| N  | 3.6495   | 0.41429  | 0.52887  |
| C  | -0.74012 | 0.13808  | -2.24933 |
| C  | -0.44409 | -1.15288 | -2.69447 |
| H  | -0.88182 | -1.46399 | -3.6318  |
| C  | 0.33925  | -2.0916  | -2.0173  |
| C  | -2.0418  | 1.982    | -2.21679 |
| H  | -2.9813  | 1.76032  | -1.70597 |
| H  | -2.19843 | 2.8052   | -2.91091 |
| C  | -0.88273 | 2.16989  | -1.22442 |
| H  | -1.28473 | 2.38446  | -0.23055 |
| C  | 0.10918  | 3.32022  | -1.58091 |
| C  | -0.62496 | 4.66533  | -1.44466 |
| H  | 0.0451   | 5.49348  | -1.69354 |
| H  | -0.97928 | 4.82208  | -0.42224 |
| H  | -1.48834 | 4.73698  | -2.11138 |
| C  | 1.27617  | 3.31474  | -0.58106 |
| H  | 1.92843  | 2.44696  | -0.71731 |
| H  | 0.91941  | 3.34034  | 0.45587  |
| H  | 1.91608  | 4.19058  | -0.71553 |
| C  | 0.66073  | 3.16745  | -3.00565 |
| H  | 1.13396  | 2.19449  | -3.15061 |
| H  | 1.41398  | 3.93431  | -3.20972 |
| H  | -0.12024 | 3.2708   | -3.7634  |
| C  | 1.55345  | -3.99292 | -1.93536 |
| H  | 2.51917  | -3.86848 | -2.43383 |
| H  | 1.27838  | -5.04564 | -1.9588  |
| C  | 1.53507  | -3.3432  | -0.54019 |
| H  | 2.56365  | -3.17523 | -0.19726 |
| C  | 0.81202  | -4.17022 | 0.5659   |
| C  | -0.62009 | -4.52739 | 0.14045  |
| H  | -1.1513  | -5.02691 | 0.95584  |
| H  | -0.6362  | -5.20483 | -0.71723 |
| C  | 0.77215  | -3.34665 | 1.86373  |
| H  | 0.36269  | -3.93221 | 2.69077  |
| H  | 0.12433  | -2.46771 | 1.77369  |
| H  | 1.77629  | -3.02759 | 2.17003  |
| C  | 1.61803  | -5.45211 | 0.8361   |
| H  | 1.15322  | -6.03798 | 1.63427  |
| H  | 2.64261  | -5.22385 | 1.14852  |
| H  | 1.67527  | -6.09786 | -0.04436 |
| C  | 3.29465  | -0.04245 | -2.4034  |
| H  | 3.00041  | -1.09399 | -2.34861 |
| H  | 3.80282  | 0.09451  | -3.36469 |
| H  | 2.37248  | 0.54367  | -2.46081 |
| C  | 5.1328   | 2.17415  | -1.42513 |
| H  | 5.63486  | 2.17945  | -2.39946 |
| H  | 5.85779  | 2.53864  | -0.68983 |
| H  | 4.32357  | 2.9107   | -1.47278 |
| C  | 5.90982  | -0.77367 | -1.12264 |
| H  | 6.26061  | -0.85479 | -2.1583  |
| H  | 5.60574  | -1.77739 | -0.80405 |
| H  | 6.7706   | -0.48683 | -0.51322 |
| C  | 4.06455  | 2.74159  | 2.35027  |
| H  | 2.99522  | 2.90502  | 2.53061  |
| H  | 4.35088  | 3.37833  | 1.50635  |
| H  | 4.59564  | 3.10788  | 3.2363   |
| C  | 6.30738  | 0.68523  | 2.03768  |
| H  | 6.59307  | -0.36428 | 1.91847  |
| H  | 6.69484  | 1.01714  | 3.00801  |
| H  | 6.83312  | 1.2618   | 1.27097  |
| C  | 3.75689  | -0.07948 | 3.46411  |

---

|    |          |          |          |
|----|----------|----------|----------|
| H  | 2.68963  | 0.07725  | 3.66272  |
| H  | 4.27604  | 0.20759  | 4.38563  |
| H  | 3.92043  | -1.15548 | 3.33115  |
| H  | -1.19021 | -3.63793 | -0.13477 |
| H  | 0.21113  | 0.64296  | 2.64418  |
| C  | -5.54535 | -1.42786 | -2.18781 |
| C  | -4.25176 | -1.01109 | -1.88427 |
| C  | -3.79023 | -1.05008 | -0.56841 |
| C  | -4.60789 | -1.5108  | 0.47194  |
| C  | -5.90684 | -1.93207 | 0.14677  |
| C  | -6.37248 | -1.891   | -1.16429 |
| H  | -5.90368 | -1.39899 | -3.21192 |
| H  | -3.59192 | -0.65088 | -2.6653  |
| H  | -2.77997 | -0.7171  | -0.36115 |
| H  | -6.55987 | -2.29641 | 0.93524  |
| H  | -7.38063 | -2.2267  | -1.38796 |
| C  | -4.15105 | -1.51628 | 1.91691  |
| C  | -2.63273 | -1.65051 | 2.10994  |
| H  | -2.38233 | -1.81333 | 3.16105  |
| H  | -2.24577 | -2.49732 | 1.53846  |
| H  | -2.08828 | -0.75502 | 1.79763  |
| Si | -4.81881 | 0.04348  | 2.79729  |
| H  | -4.2744  | 0.09851  | 4.1805   |
| C  | -4.34433 | 1.61918  | 1.89083  |
| C  | -5.07386 | 2.03493  | 0.76367  |
| C  | -3.26935 | 2.41767  | 2.31478  |
| C  | -4.75213 | 3.21308  | 0.09349  |
| H  | -5.90369 | 1.43488  | 0.40204  |
| C  | -2.94645 | 3.59876  | 1.64667  |
| H  | -2.67507 | 2.12052  | 3.17367  |
| C  | -3.69134 | 4.00107  | 0.53896  |
| H  | -5.33153 | 3.51728  | -0.77269 |
| H  | -2.11587 | 4.20533  | 1.99443  |
| H  | -3.44491 | 4.92232  | 0.02159  |
| H  | -6.30162 | -0.04875 | 2.85422  |
| H  | -4.63576 | -2.36255 | 2.42033  |

Zero-point correction = 0.879425

Thermal correction to Enthalpy = 0.954565

Thermal correction to Gibbs Free Energy = 0.76216

#### TS2me

|    |          |          |          |
|----|----------|----------|----------|
| La | 0.3102   | 0.1047   | 0.69881  |
| Si | 3.28004  | -0.63767 | -1.33887 |
| Si | 3.27381  | -1.79491 | 1.45757  |
| O  | -1.82201 | 3.78143  | -1.16072 |
| O  | -3.09921 | -0.41089 | -2.55248 |
| N  | -0.21876 | 2.32579  | -0.50339 |
| N  | -1.22152 | -0.6623  | -1.30664 |
| N  | 2.51832  | -0.85866 | 0.21075  |
| C  | -1.38456 | 2.49012  | -1.11197 |
| C  | -2.2661  | 1.56811  | -1.68451 |
| H  | -3.16544 | 1.98418  | -2.11587 |
| C  | -2.12726 | 0.18178  | -1.79057 |
| C  | -0.7604  | 4.62179  | -0.67536 |
| H  | -1.1928  | 5.36136  | -0.00163 |
| H  | -0.31974 | 5.1362   | -1.53283 |
| C  | 0.21192  | 3.64945  | 0.01589  |
| H  | 0.02759  | 3.66361  | 1.09851  |
| C  | 1.71389  | 3.99103  | -0.17909 |
| C  | 1.94277  | 5.43322  | 0.31132  |
| H  | 3.00537  | 5.68905  | 0.26695  |
| H  | 1.61761  | 5.55921  | 1.34937  |
| H  | 1.40918  | 6.16864  | -0.29792 |
| C  | 2.5647   | 3.05073  | 0.68838  |
| H  | 2.50733  | 2.01209  | 0.35274  |
| H  | 2.25769  | 3.08385  | 1.73702  |
| H  | 3.6229   | 3.32301  | 0.64101  |
| C  | 2.1441   | 3.86499  | -1.64723 |
| H  | 1.97478  | 2.85696  | -2.02731 |
| H  | 3.20942  | 4.08943  | -1.7533  |
| H  | 1.60384  | 4.55644  | -2.29962 |
| C  | -2.9168  | -1.82981 | -2.41046 |
| H  | -3.18851 | -2.30003 | -3.35382 |
| H  | -3.57569 | -2.18768 | -1.61142 |
| C  | -1.437   | -1.94068 | -2.04968 |
| H  | -0.86425 | -1.87495 | -2.98734 |
| C  | -1.01599 | -3.27158 | -1.37548 |

|   |          |          |          |
|---|----------|----------|----------|
| C | -1.47426 | -3.35097 | 0.08399  |
| H | -1.20377 | -4.31563 | 0.52307  |
| H | -2.55183 | -3.22267 | 0.18542  |
| H | -1.00815 | -2.57608 | 0.70092  |
| C | 0.50903  | -3.43985 | -1.45525 |
| H | 0.81903  | -4.38887 | -1.00812 |
| H | 1.05065  | -2.64817 | -0.93733 |
| H | 0.84859  | -3.44174 | -2.49478 |
| C | -1.65797 | -4.43224 | -2.1629  |
| H | -1.28452 | -5.39257 | -1.79599 |
| H | -1.41501 | -4.3735  | -3.22858 |
| H | -2.74706 | -4.4501  | -2.06663 |
| C | 4.63666  | 0.68514  | -1.3366  |
| H | 4.23254  | 1.69632  | -1.24458 |
| H | 5.20456  | 0.6524   | -2.27414 |
| H | 5.34995  | 0.54412  | -0.51896 |
| C | 4.09338  | -2.21    | -2.01735 |
| H | 4.44622  | -2.033   | -3.04029 |
| H | 3.39846  | -3.05366 | -2.05699 |
| H | 4.96418  | -2.52467 | -1.43317 |
| C | 2.01691  | -0.11047 | -2.65074 |
| H | 2.54546  | 0.16576  | -3.57058 |
| H | 1.40091  | 0.75277  | -2.38044 |
| H | 1.32852  | -0.91999 | -2.9062  |
| C | 5.0671   | -1.29962 | 1.79782  |
| H | 5.15386  | -0.23353 | 2.03091  |
| H | 5.71983  | -1.5016  | 0.94237  |
| H | 5.47617  | -1.85641 | 2.6487   |
| C | 3.24308  | -3.66396 | 1.14952  |
| H | 2.21744  | -4.04234 | 1.08405  |
| H | 3.73096  | -4.19976 | 1.97258  |
| H | 3.75378  | -3.95421 | 0.22786  |
| C | 2.31746  | -1.57273 | 3.08954  |
| H | 2.25501  | -0.53048 | 3.42126  |
| H | 2.83382  | -2.11849 | 3.88687  |
| H | 1.30224  | -1.98912 | 3.06719  |
| H | 0.31446  | 1.40372  | 2.60535  |
| C | -4.39911 | 1.0558   | 1.10087  |
| C | -3.23795 | 0.90054  | 1.84947  |
| C | -2.83134 | -0.36688 | 2.31363  |
| C | -3.66617 | -1.45701 | 2.0046   |
| C | -4.82765 | -1.29191 | 1.26116  |
| C | -5.2147  | -0.03432 | 0.78179  |
| H | -4.6606  | 2.04463  | 0.7357   |
| H | -2.62869 | 1.77557  | 2.05644  |
| H | -3.39342 | -2.4467  | 2.35907  |
| H | -5.4449  | -2.15959 | 1.04218  |
| C | -1.58002 | -0.57302 | 3.04579  |
| H | -1.2586  | -1.60453 | 3.18356  |
| C | -0.86253 | 0.42401  | 3.66894  |
| H | -1.30499 | 1.392    | 3.86167  |
| H | -0.0432  | 0.16373  | 4.32684  |
| C | -6.42259 | 0.13215  | -0.1033  |
| H | -6.94463 | 1.07289  | 0.0929   |
| H | -6.12984 | 0.1413   | -1.15968 |
| H | -7.14016 | -0.68176 | 0.03035  |

Zero-point correction = 0.785699

Thermal correction to Enthalpy = 0.851601

Thermal correction to Gibbs Free Energy = 0.680658

### IM2me

|    |          |          |          |
|----|----------|----------|----------|
| La | -0.1767  | 0.062    | 0.62103  |
| Si | -2.71186 | -1.65291 | -1.44278 |
| Si | -3.19331 | -1.78277 | 1.52839  |
| O  | 3.30801  | -0.02863 | -2.50036 |
| O  | -0.09257 | 3.04233  | -3.04607 |
| N  | 1.63106  | -0.52712 | -1.07316 |
| N  | -0.42848 | 1.96278  | -1.08874 |
| N  | -2.25065 | -1.23754 | 0.18138  |
| C  | 2.09175  | 0.3063   | -1.98999 |
| C  | 1.52816  | 1.46495  | -2.53774 |
| H  | 2.0427   | 1.88544  | -3.39019 |
| C  | 0.34315  | 2.10387  | -2.15977 |
| C  | 3.74608  | -1.24363 | -1.86662 |
| H  | 4.71213  | -1.05517 | -1.39851 |
| H  | 3.87275  | -1.9963  | -2.64605 |
| C  | 2.64136  | -1.58294 | -0.84159 |

|   |          |          |          |
|---|----------|----------|----------|
| H | 3.04574  | -1.46146 | 0.16948  |
| C | 2.09468  | -3.03692 | -0.93217 |
| C | 3.26819  | -4.00453 | -0.69372 |
| H | 2.91895  | -5.04105 | -0.68984 |
| H | 3.75234  | -3.81549 | 0.27038  |
| H | 4.03384  | -3.9272  | -1.47084 |
| C | 1.05615  | -3.26253 | 0.17966  |
| H | 0.12652  | -2.71216 | -0.00055 |
| H | 1.45593  | -2.98996 | 1.16445  |
| H | 0.76312  | -4.31441 | 0.23716  |
| C | 1.44321  | -3.32027 | -2.29244 |
| H | 0.61611  | -2.63654 | -2.48836 |
| H | 1.04845  | -4.3398  | -2.3245  |
| H | 2.15339  | -3.22491 | -3.11821 |
| C | -1.24774 | 3.6862   | -2.48651 |
| H | -2.02833 | 3.70537  | -3.24743 |
| H | -0.97161 | 4.71293  | -2.2371  |
| C | -1.61486 | 2.83323  | -1.25437 |
| H | -2.47999 | 2.20088  | -1.49711 |
| C | -2.02672 | 3.66982  | -0.00823 |
| C | -0.87677 | 4.548    | 0.50307  |
| H | -1.16944 | 5.06229  | 1.42328  |
| H | -0.58305 | 5.3164   | -0.21629 |
| H | 0.00857  | 3.94748  | 0.72369  |
| C | -2.48313 | 2.73683  | 1.12656  |
| H | -3.03175 | 3.29297  | 1.89187  |
| H | -1.63455 | 2.28944  | 1.65908  |
| H | -3.14256 | 1.94259  | 0.76432  |
| C | -3.22648 | 4.54869  | -0.40911 |
| H | -3.57923 | 5.13004  | 0.44734  |
| H | -4.0655  | 3.94082  | -0.76332 |
| H | -2.97365 | 5.26142  | -1.19896 |
| C | -2.45303 | -3.49185 | -1.83702 |
| H | -1.47394 | -3.84873 | -1.50428 |
| H | -2.51179 | -3.67439 | -2.91633 |
| H | -3.20538 | -4.12778 | -1.36198 |
| C | -4.53156 | -1.27    | -1.81917 |
| H | -4.75815 | -1.47022 | -2.87307 |
| H | -4.76994 | -0.21771 | -1.63014 |
| H | -5.22461 | -1.87419 | -1.22489 |
| C | -1.71859 | -0.69101 | -2.73686 |
| H | -1.95361 | -1.08916 | -3.73061 |
| H | -0.63345 | -0.75458 | -2.62468 |
| H | -1.97647 | 0.37061  | -2.7542  |
| C | -3.76521 | -3.5855  | 1.42534  |
| H | -2.92943 | -4.26846 | 1.24283  |
| H | -4.50195 | -3.75141 | 0.63348  |
| H | -4.23713 | -3.8896  | 2.36695  |
| C | -4.73212 | -0.7272  | 1.85076  |
| H | -4.47025 | 0.31745  | 2.05279  |
| H | -5.29356 | -1.09206 | 2.71902  |
| H | -5.41708 | -0.72772 | 0.99714  |
| C | -2.13786 | -1.65646 | 3.10518  |
| H | -1.20734 | -2.23434 | 3.04211  |
| H | -2.68682 | -2.06231 | 3.96191  |
| H | -1.88272 | -0.62838 | 3.38436  |
| H | 0.5276   | -0.52483 | 4.25842  |
| C | 4.29515  | -0.13301 | 2.14637  |
| C | 3.04751  | 0.02287  | 2.74786  |
| C | 2.16254  | 1.07009  | 2.37755  |
| C | 2.63416  | 1.92532  | 1.34355  |
| C | 3.87313  | 1.7509   | 0.74413  |
| C | 4.73973  | 0.71956  | 1.13174  |
| H | 4.94016  | -0.94332 | 2.47986  |
| H | 2.76418  | -0.65947 | 3.54323  |
| H | 2.00722  | 2.75134  | 1.01598  |
| H | 4.17266  | 2.43003  | -0.04966 |
| C | 0.8077   | 1.19589  | 2.90625  |
| H | 0.47332  | 2.23948  | 2.87088  |
| C | 0.52417  | 0.57291  | 4.2687   |
| H | 1.25034  | 0.87158  | 5.04201  |
| H | -0.46455 | 0.86638  | 4.6339   |
| C | 6.10328  | 0.56654  | 0.50491  |
| H | 6.45427  | -0.469   | 0.54073  |
| H | 6.10363  | 0.88428  | -0.54156 |
| H | 6.85516  | 1.17504  | 1.02189  |

Zero-point correction = 0.791845

---

Thermal correction to Enthalpy = 0.857636  
Thermal correction to Gibbs Free Energy = 0.689927

**IM3me**

|    |          |          |          |
|----|----------|----------|----------|
| La | 0.52779  | 0.04196  | -0.35292 |
| Si | 2.60494  | -2.57049 | 1.35621  |
| Si | 0.36005  | -3.5247  | -0.41066 |
| O  | -0.08797 | 3.7988   | 2.36591  |
| O  | 4.05996  | 3.08593  | 0.46456  |
| N  | 0.03352  | 1.70461  | 1.53528  |
| N  | 2.7033   | 1.37339  | -0.10696 |
| N  | 1.30511  | -2.23573 | 0.2537   |
| C  | 0.61626  | 2.88725  | 1.63844  |
| C  | 1.84996  | 3.33219  | 1.15183  |
| H  | 2.1621   | 4.31968  | 1.4608   |
| C  | 2.80883  | 2.55231  | 0.49237  |
| C  | -1.36642 | 3.20953  | 2.67623  |
| H  | -2.12235 | 3.66915  | 2.03504  |
| H  | -1.5927  | 3.44213  | 3.71533  |
| C  | -1.18431 | 1.71011  | 2.37226  |
| H  | -2.03594 | 1.35248  | 1.78062  |
| C  | -1.0762  | 0.78686  | 3.62458  |
| C  | -2.39263 | 0.86727  | 4.41635  |
| H  | -2.38288 | 0.16104  | 5.25154  |
| H  | -3.25437 | 0.62118  | 3.78831  |
| H  | -2.56332 | 1.86082  | 4.83927  |
| C  | -0.87363 | -0.66365 | 3.15974  |
| H  | 0.09731  | -0.80428 | 2.68373  |
| H  | -1.65398 | -0.97613 | 2.45846  |
| H  | -0.90658 | -1.35825 | 4.0042   |
| C  | 0.10262  | 1.20176  | 4.51655  |
| H  | 1.04524  | 1.16821  | 3.96556  |
| H  | 0.19245  | 0.52605  | 5.37257  |
| H  | -0.016   | 2.21408  | 4.91311  |
| C  | 4.96233  | 2.04562  | 0.04838  |
| H  | 5.49635  | 1.68558  | 0.93214  |
| H  | 5.68057  | 2.48655  | -0.63985 |
| C  | 4.05426  | 0.95636  | -0.56222 |
| H  | 4.29011  | -0.00965 | -0.10603 |
| C  | 4.21438  | 0.77794  | -2.10288 |
| C  | 3.91071  | 2.08537  | -2.84737 |
| H  | 3.95058  | 1.93117  | -3.92965 |
| H  | 4.62424  | 2.87758  | -2.60565 |
| C  | 3.27041  | -0.32414 | -2.6134  |
| H  | 3.52924  | -0.60591 | -3.63798 |
| H  | 2.23554  | 0.0223   | -2.66421 |
| H  | 3.32268  | -1.23256 | -2.00649 |
| C  | 5.65804  | 0.32192  | -2.38637 |
| H  | 5.80374  | 0.16043  | -3.45819 |
| H  | 5.88515  | -0.62152 | -1.8788  |
| H  | 6.40237  | 1.05681  | -2.0694  |
| C  | 3.01304  | -1.07614 | 2.45223  |
| H  | 4.0034   | -1.20748 | 2.90382  |
| H  | 2.30383  | -0.98036 | 3.27996  |
| H  | 3.02641  | -0.1179  | 1.92641  |
| C  | 2.24442  | -3.97767 | 2.57611  |
| H  | 3.06291  | -4.06013 | 3.30124  |
| H  | 2.1462   | -4.95604 | 2.09547  |
| H  | 1.32695  | -3.79568 | 3.14504  |
| C  | 4.19833  | -3.05516 | 0.4475   |
| H  | 5.00017  | -3.30588 | 1.152    |
| H  | 4.57417  | -2.25215 | -0.19439 |
| H  | 4.04293  | -3.92897 | -0.19314 |
| C  | -0.82916 | -4.30388 | 0.84069  |
| H  | -1.38135 | -3.53841 | 1.39416  |
| H  | -0.302   | -4.91672 | 1.5773   |
| H  | -1.56438 | -4.95064 | 0.3488   |
| C  | 1.37025  | -4.92975 | -1.17713 |
| H  | 2.03742  | -4.56761 | -1.96642 |
| H  | 0.71252  | -5.68303 | -1.6266  |
| H  | 1.98926  | -5.44969 | -0.43919 |
| C  | -0.7212  | -2.8418  | -1.81871 |
| H  | -1.47998 | -2.11228 | -1.50963 |
| H  | -1.29071 | -3.6649  | -2.26331 |
| H  | -0.13823 | -2.40482 | -2.63589 |
| H  | 2.91161  | 2.45372  | -2.60286 |
| H  | -3.28487 | -1.8021  | -3.39401 |



---

|    |          |          |          |
|----|----------|----------|----------|
| C  | -3.61555 | 3.31683  | -1.3644  |
| C  | -2.30444 | 3.62826  | -0.97589 |
| C  | -1.21275 | 2.92337  | -1.46365 |
| C  | -1.3522  | 1.83932  | -2.37399 |
| C  | -2.6816  | 1.55012  | -2.76896 |
| C  | -3.7688  | 2.27317  | -2.28203 |
| H  | -2.13033 | 4.45674  | -0.29316 |
| H  | -0.21563 | 3.24009  | -1.16342 |
| H  | -2.86217 | 0.76737  | -3.49684 |
| H  | -4.76542 | 2.02045  | -2.63732 |
| C  | -0.18849 | 1.0616   | -2.80333 |
| C  | -0.34551 | 0.2075   | -4.0554  |
| H  | -0.69433 | 0.77907  | -4.93145 |
| H  | 0.60619  | -0.25261 | -4.34117 |
| H  | -1.05723 | -0.61539 | -3.92536 |
| Si | -4.6042  | -1.84532 | -2.71729 |
| H  | -5.27214 | -3.11838 | -3.08965 |
| C  | -4.43469 | -1.77006 | -0.84455 |
| C  | -4.4895  | -0.54637 | -0.1552  |
| C  | -4.28312 | -2.94489 | -0.09058 |
| C  | -4.40566 | -0.50201 | 1.23554  |
| H  | -4.60333 | 0.38285  | -0.70235 |
| C  | -4.19663 | -2.90297 | 1.30031  |
| H  | -4.2397  | -3.90955 | -0.58808 |
| C  | -4.26248 | -1.68078 | 1.9669   |
| H  | -4.46412 | 0.45382  | 1.74587  |
| H  | -4.07721 | -3.82372 | 1.86145  |
| H  | -4.20103 | -1.64749 | 3.04968  |
| H  | -5.41378 | -0.6961  | -3.19141 |
| H  | 0.68325  | 1.72369  | -2.89429 |
| C  | -4.79627 | 4.07065  | -0.80479 |
| H  | -5.01597 | 3.77583  | 0.22917  |
| H  | -4.62002 | 5.15107  | -0.79429 |
| H  | -5.70289 | 3.8917   | -1.38904 |

Zero-point correction = 0.907751

Thermal correction to Enthalpy = 0.985898

Thermal correction to Gibbs Free Energy = 0.787973

### TS3me

|    |          |          |          |
|----|----------|----------|----------|
| La | 0.50966  | 0.07824  | -0.42062 |
| Si | 3.8565   | -0.86437 | 0.72741  |
| Si | 3.35685  | -1.42936 | -2.16644 |
| O  | -2.07108 | -0.32954 | 3.38971  |
| O  | 0.99041  | 3.13316  | 3.12858  |
| N  | -0.63991 | -0.68633 | 1.68124  |
| N  | 1.06262  | 1.93582  | 1.21808  |
| N  | 2.78489  | -0.77175 | -0.65077 |
| C  | -1.03902 | 0.1449   | 2.64299  |
| C  | -0.55436 | 1.39768  | 3.01408  |
| H  | -0.97465 | 1.83378  | 3.90909  |
| C  | 0.48877  | 2.10372  | 2.40122  |
| C  | -2.55264 | -1.52598 | 2.73939  |
| H  | -3.43395 | -1.2647  | 2.14901  |
| H  | -2.83493 | -2.23187 | 3.51725  |
| C  | -1.3812  | -1.96387 | 1.85149  |
| H  | -1.75958 | -2.29591 | 0.88254  |
| C  | -0.51867 | -3.12478 | 2.43474  |
| C  | -1.39039 | -4.3911  | 2.5168   |
| H  | -0.79593 | -5.24155 | 2.86325  |
| H  | -1.80456 | -4.65421 | 1.53896  |
| H  | -2.22518 | -4.27965 | 3.21378  |
| C  | 0.65167  | -3.41185 | 1.48376  |
| H  | 1.33513  | -2.56563 | 1.41504  |
| H  | 0.29871  | -3.65247 | 0.47574  |
| H  | 1.23882  | -4.2652  | 1.8341   |
| C  | 0.02565  | -2.77704 | 3.82808  |
| H  | 0.63207  | -1.86956 | 3.81016  |
| H  | 0.65753  | -3.5876  | 4.20326  |
| H  | -0.775   | -2.62511 | 4.55666  |
| C  | 2.19172  | 3.58574  | 2.4771   |
| H  | 3.04664  | 3.24561  | 3.06678  |
| H  | 2.17756  | 4.67372  | 2.47854  |
| C  | 2.15005  | 2.93723  | 1.07667  |
| H  | 3.08917  | 2.4079   | 0.88884  |
| C  | 1.96312  | 3.94986  | -0.09283 |
| C  | 0.66567  | 4.75432  | 0.06649  |
| H  | 0.5126   | 5.41319  | -0.79245 |

|    |          |          |          |
|----|----------|----------|----------|
| H  | 0.67887  | 5.38532  | 0.95899  |
| C  | 1.9389   | 3.19892  | -1.43394 |
| H  | 2.00916  | 3.89512  | -2.27353 |
| H  | 0.99488  | 2.66901  | -1.58749 |
| H  | 2.77237  | 2.49505  | -1.52353 |
| C  | 3.18021  | 4.89379  | -0.11228 |
| H  | 3.10119  | 5.6019   | -0.94188 |
| H  | 4.11535  | 4.33841  | -0.24055 |
| H  | 3.26794  | 5.48405  | 0.80339  |
| C  | 3.03107  | -0.38733 | 2.36892  |
| H  | 3.05451  | 0.68963  | 2.54317  |
| H  | 3.60541  | -0.85123 | 3.17928  |
| H  | 1.99655  | -0.70645 | 2.49939  |
| C  | 4.54452  | -2.61198 | 0.99272  |
| H  | 5.20387  | -2.63136 | 1.86846  |
| H  | 5.13162  | -2.97901 | 0.14617  |
| H  | 3.74472  | -3.33661 | 1.17537  |
| C  | 5.344    | 0.3071   | 0.59862  |
| H  | 5.80831  | 0.4398   | 1.58321  |
| H  | 5.05046  | 1.30069  | 0.2435   |
| H  | 6.12213  | -0.05773 | -0.0759  |
| C  | 2.98189  | -3.28086 | -2.29833 |
| H  | 1.9093   | -3.4849  | -2.2031  |
| H  | 3.48362  | -3.85224 | -1.51146 |
| H  | 3.30354  | -3.69332 | -3.26148 |
| C  | 5.20756  | -1.20533 | -2.49419 |
| H  | 5.50022  | -0.15097 | -2.48956 |
| H  | 5.44631  | -1.60302 | -3.48729 |
| H  | 5.84825  | -1.73062 | -1.78132 |
| C  | 2.50272  | -0.59626 | -3.63972 |
| H  | 1.45239  | -0.8661  | -3.78104 |
| H  | 3.01171  | -0.89973 | -4.56154 |
| H  | 2.55728  | 0.49728  | -3.59855 |
| H  | -0.20328 | 4.09762  | 0.13832  |
| H  | -0.15294 | 0.71976  | -2.94184 |
| C  | -6.02553 | 1.01047  | -0.02332 |
| C  | -4.92508 | 0.89283  | 0.83706  |
| C  | -3.64501 | 1.24649  | 0.43201  |
| C  | -3.37144 | 1.74052  | -0.86424 |
| C  | -4.49927 | 1.91316  | -1.70003 |
| C  | -5.77834 | 1.5397   | -1.29327 |
| H  | -5.07712 | 0.52965  | 1.85121  |
| H  | -2.82726 | 1.14575  | 1.13805  |
| H  | -4.37559 | 2.327    | -2.69405 |
| H  | -6.60831 | 1.67261  | -1.98422 |
| C  | -1.99621 | 1.98007  | -1.32177 |
| C  | -1.79975 | 3.19632  | -2.22573 |
| H  | -2.08407 | 4.13897  | -1.73563 |
| H  | -0.75844 | 3.308    | -2.54453 |
| H  | -2.38998 | 3.1419   | -3.14526 |
| Si | -1.56575 | 0.23921  | -3.24179 |
| H  | -1.17385 | -0.41362 | -4.56001 |
| C  | -1.97858 | -1.33928 | -2.26731 |
| C  | -3.20067 | -1.52239 | -1.59331 |
| C  | -1.11986 | -2.4532  | -2.36721 |
| C  | -3.54908 | -2.76333 | -1.06168 |
| H  | -3.89648 | -0.69947 | -1.50143 |
| C  | -1.45216 | -3.68841 | -1.80889 |
| H  | -0.19992 | -2.37669 | -2.94338 |
| C  | -2.6777  | -3.84783 | -1.16476 |
| H  | -4.5071  | -2.88005 | -0.56516 |
| H  | -0.77036 | -4.52735 | -1.90498 |
| H  | -2.95472 | -4.81217 | -0.7518  |
| H  | -2.70975 | 1.0635   | -3.67809 |
| H  | -1.35807 | 2.12387  | -0.43141 |
| C  | -7.42038 | 0.64958  | 0.42455  |
| H  | -7.4103  | -0.14213 | 1.17966  |
| H  | -7.93872 | 1.50823  | 0.86877  |
| H  | -8.03604 | 0.30185  | -0.41037 |

Zero-point correction = 0.910175

Thermal correction to Enthalpy = 0.985806

Thermal correction to Gibbs Free Energy = 0.798307

#### PRODme

|    |         |          |          |
|----|---------|----------|----------|
| La | 1.07755 | -0.02153 | -0.45119 |
| Si | 4.47502 | 0.11043  | 0.88022  |
| Si | 4.26252 | -1.09282 | -1.88195 |

---

|   |          |          |          |
|---|----------|----------|----------|
| O | -1.86869 | -0.79239 | 3.20846  |
| O | 0.15965  | 3.36321  | 2.75092  |
| N | -0.41021 | -0.82654 | 1.4873   |
| N | 0.66317  | 2.0645   | 0.97319  |
| N | 3.52713  | -0.33991 | -0.50094 |
| C | -0.96062 | -0.10906 | 2.45287  |
| C | -0.75616 | 1.22368  | 2.81994  |
| H | -1.25737 | 1.56899  | 3.71248  |
| C | 0.03031  | 2.15449  | 2.13734  |
| C | -2.12003 | -2.04342 | 2.53422  |
| H | -3.05336 | -1.94787 | 1.9734   |
| H | -2.23402 | -2.81249 | 3.29566  |
| C | -0.91109 | -2.21696 | 1.60154  |
| H | -1.24981 | -2.56588 | 0.62183  |
| C | 0.16873  | -3.22218 | 2.10954  |
| C | -0.43608 | -4.63663 | 2.12428  |
| H | 0.29902  | -5.36482 | 2.47926  |
| H | -0.75165 | -4.94445 | 1.12367  |
| H | -1.30583 | -4.71    | 2.78283  |
| C | 1.35918  | -3.22563 | 1.13722  |
| H | 1.92685  | -2.29112 | 1.168    |
| H | 1.03701  | -3.41962 | 0.10683  |
| H | 2.07464  | -4.01134 | 1.3951   |
| C | 0.6638   | -2.84692 | 3.51415  |
| H | 1.04488  | -1.82379 | 3.54325  |
| H | 1.47445  | -3.51228 | 3.8261   |
| H | -0.12782 | -2.92562 | 4.26384  |
| C | 1.17835  | 4.09442  | 2.04336  |
| H | 2.10867  | 4.0289   | 2.61516  |
| H | 0.86671  | 5.13595  | 1.99439  |
| C | 1.28368  | 3.38041  | 0.6846   |
| H | 2.3388   | 3.23283  | 0.42681  |
| C | 0.6261   | 4.14112  | -0.50648 |
| C | -0.86006 | 4.4199   | -0.23718 |
| H | -1.32063 | 4.90786  | -1.10098 |
| H | -1.00807 | 5.07706  | 0.62383  |
| C | 0.75575  | 3.29418  | -1.77935 |
| H | 0.41982  | 3.84942  | -2.65929 |
| H | 0.12677  | 2.39965  | -1.743   |
| H | 1.79427  | 2.99609  | -1.96943 |
| C | 1.38561  | 5.4604   | -0.72884 |
| H | 0.97865  | 5.99586  | -1.59129 |
| H | 2.44842  | 5.28202  | -0.92442 |
| H | 1.31404  | 6.1339   | 0.12932  |
| C | 3.39284  | 0.30186  | 2.42498  |
| H | 2.64745  | 1.0984   | 2.35118  |
| H | 4.02574  | 0.54341  | 3.28644  |
| H | 2.85773  | -0.61816 | 2.68297  |
| C | 5.80438  | -1.15414 | 1.3554   |
| H | 6.31072  | -0.84221 | 2.27634  |
| H | 6.57995  | -1.27148 | 0.59236  |
| H | 5.37291  | -2.14308 | 1.54144  |
| C | 5.35073  | 1.7735   | 0.63409  |
| H | 5.89234  | 2.08454  | 1.53518  |
| H | 4.63689  | 2.57067  | 0.39516  |
| H | 6.07621  | 1.73782  | -0.18493 |
| C | 4.70408  | -2.91055 | -1.57453 |
| H | 3.85067  | -3.46049 | -1.16077 |
| H | 5.53168  | -3.02779 | -0.86913 |
| H | 4.99606  | -3.41386 | -2.50385 |
| C | 5.82959  | -0.21665 | -2.484   |
| H | 5.63734  | 0.83481  | -2.72193 |
| H | 6.21859  | -0.6913  | -3.39223 |
| H | 6.63305  | -0.24238 | -1.74129 |
| C | 3.05073  | -1.11038 | -3.34106 |
| H | 2.16092  | -1.72975 | -3.17675 |
| H | 3.55014  | -1.53152 | -4.22122 |
| H | 2.69682  | -0.11513 | -3.63083 |
| H | -1.41057 | 3.49606  | -0.0456  |
| H | -0.08095 | -0.05007 | -2.40102 |
| C | -5.66826 | 0.75676  | 1.22603  |
| C | -4.27794 | 0.74758  | 1.36212  |
| C | -3.44788 | 0.96573  | 0.26388  |
| C | -3.96981 | 1.19958  | -1.01205 |
| C | -5.36652 | 1.22126  | -1.14387 |
| C | -6.19543 | 1.00262  | -0.04795 |
| H | -3.82886 | 0.56466  | 2.33302  |

---

|    |          |          |          |
|----|----------|----------|----------|
| H  | -2.37298 | 0.94764  | 0.40733  |
| H  | -5.81365 | 1.39273  | -2.11794 |
| H  | -7.27361 | 1.01905  | -0.18558 |
| C  | -3.05123 | 1.35082  | -2.20432 |
| C  | -3.32628 | 2.60791  | -3.05024 |
| H  | -3.29202 | 3.50746  | -2.42703 |
| H  | -2.57777 | 2.72311  | -3.8401  |
| H  | -4.30796 | 2.58173  | -3.53162 |
| Si | -3.1155  | -0.22714 | -3.27784 |
| H  | -2.13432 | -0.16943 | -4.38813 |
| C  | -2.8768  | -1.8376  | -2.32279 |
| C  | -3.79389 | -2.24359 | -1.3382  |
| C  | -1.82149 | -2.71114 | -2.63682 |
| C  | -3.66968 | -3.47893 | -0.70266 |
| H  | -4.61996 | -1.59499 | -1.064   |
| C  | -1.6971  | -3.94977 | -2.00724 |
| H  | -1.09124 | -2.42145 | -3.38574 |
| C  | -2.62638 | -4.33884 | -1.04241 |
| H  | -4.3937  | -3.77376 | 0.05073  |
| H  | -0.88196 | -4.61482 | -2.27741 |
| H  | -2.53883 | -5.30662 | -0.55944 |
| H  | -4.48177 | -0.26395 | -3.87631 |
| H  | -2.02188 | 1.4089   | -1.8397  |
| C  | -6.57679 | 0.54331  | 2.4111   |
| H  | -6.04802 | 0.07568  | 3.24527  |
| H  | -6.98294 | 1.4938   | 2.77518  |
| H  | -7.42994 | -0.09254 | 2.15639  |

Zero-point correction = 0.907893

Thermal correction to Enthalpy = 0.985104

Thermal correction to Gibbs Free Energy = 0.788944

#### PhSiH<sub>2</sub>N(TMS)<sub>2</sub>

|    |          |          |          |
|----|----------|----------|----------|
| Si | -2.01144 | -1.29141 | 0.08963  |
| Si | -1.08913 | 1.67578  | 0.09772  |
| N  | -0.85637 | -0.02296 | -0.36326 |
| C  | -1.1315  | -2.93073 | 0.39799  |
| H  | -0.73876 | -3.40023 | -0.50657 |
| H  | -1.83923 | -3.63902 | 0.84425  |
| H  | -0.30058 | -2.82428 | 1.1029   |
| C  | -2.90095 | -0.88066 | 1.70088  |
| H  | -3.61488 | -1.68446 | 1.91441  |
| H  | -3.47228 | 0.05003  | 1.68614  |
| H  | -2.20788 | -0.83794 | 2.5459   |
| C  | -3.28736 | -1.51645 | -1.27714 |
| H  | -4.0058  | -2.30633 | -1.03104 |
| H  | -2.81409 | -1.79079 | -2.22585 |
| H  | -3.85541 | -0.59676 | -1.45056 |
| C  | 0.15663  | 2.78034  | -0.78705 |
| H  | 0.02162  | 2.80203  | -1.87143 |
| H  | 1.19773  | 2.51428  | -0.58192 |
| H  | 0.01855  | 3.80622  | -0.42638 |
| C  | -0.82843 | 1.93283  | 1.94522  |
| H  | -1.58122 | 1.44052  | 2.5644   |
| H  | -0.86183 | 3.00166  | 2.18532  |
| H  | 0.15362  | 1.56369  | 2.25819  |
| C  | -2.81081 | 2.25902  | -0.40111 |
| H  | -2.9684  | 2.13645  | -1.47747 |
| H  | -2.93178 | 3.32492  | -0.17633 |
| H  | -3.61975 | 1.73248  | 0.112    |
| Si | 0.48185  | -0.43504 | -1.40693 |
| H  | 0.25885  | -1.80002 | -1.94728 |
| C  | 2.12529  | -0.36398 | -0.49254 |
| C  | 2.18769  | -0.55838 | 0.89566  |
| C  | 3.32471  | -0.11866 | -1.17901 |
| C  | 3.40437  | -0.51752 | 1.57483  |
| H  | 1.27312  | -0.73378 | 1.45429  |
| C  | 4.5443   | -0.07798 | -0.50534 |
| H  | 3.31062  | 0.05256  | -2.25279 |
| C  | 4.58553  | -0.27739 | 0.87421  |
| H  | 3.43077  | -0.66905 | 2.6497   |
| H  | 5.46085  | 0.11579  | -1.0543  |
| H  | 5.53411  | -0.24193 | 1.40096  |
| H  | 0.59179  | 0.47135  | -2.57921 |

Zero-point correction = 0.339301

Thermal correction to Enthalpy = 0.37098

Thermal correction to Gibbs Free Energy = 0.274104

---

**PhC<sub>2</sub>H<sub>3</sub>**

|   |          |          |          |
|---|----------|----------|----------|
| C | -0.40712 | -1.28063 | 0.00000  |
| C | 0.51451  | -0.2215  | -0.0001  |
| C | 0.00929  | 1.09015  | -0.00012 |
| C | -1.35956 | 1.32797  | -0.00004 |
| C | -2.26214 | 0.26242  | 0.00007  |
| C | -1.77944 | -1.04392 | 0.00009  |
| H | -0.0402  | -2.30312 | 0.00003  |
| H | 0.69103  | 1.93367  | -0.00024 |
| H | -1.72689 | 2.3495   | -0.00007 |
| H | -3.33069 | 0.45214  | 0.00014  |
| H | -2.47117 | -1.88044 | 0.00017  |
| C | 1.95433  | -0.52956 | -0.00014 |
| H | 2.19117  | -1.5927  | -0.00047 |
| C | 2.97222  | 0.33557  | 0.00019  |
| H | 2.83527  | 1.41255  | 0.00057  |
| H | 3.99896  | -0.01465 | 0.00011  |

Zero-point correction = 0.132878

Thermal correction to Enthalpy = 0.143332

Thermal correction to Gibbs Free Energy = 0.093622

**Add**

|   |          |          |          |
|---|----------|----------|----------|
| C | 0.1806   | 1.33939  | -0.002   |
| C | 1.03265  | 0.22612  | -0.00092 |
| C | 0.4344   | -1.04644 | -0.00499 |
| C | -0.94524 | -1.18779 | -0.00907 |
| C | -1.79502 | -0.07161 | -0.00859 |
| C | -1.20445 | 1.19336  | -0.00604 |
| H | 0.60995  | 2.33742  | -0.00167 |
| H | 1.05338  | -1.93738 | -0.00768 |
| H | -1.37772 | -2.18474 | -0.01383 |
| H | -1.83352 | 2.07905  | -0.00731 |
| C | 2.48862  | 0.43607  | 0.00249  |
| H | 2.79578  | 1.48106  | 0.00152  |
| C | 3.44808  | -0.49405 | 0.0074   |
| H | 3.24054  | -1.55974 | 0.00911  |
| H | 4.49566  | -0.21198 | 0.01     |
| C | -3.29212 | -0.24663 | 0.01209  |
| H | -3.61762 | -1.00838 | -0.70266 |
| H | -3.63839 | -0.56845 | 1.00076  |
| H | -3.81311 | 0.68258  | -0.23047 |

Zero-point correction = 0.160448

Thermal correction to Enthalpy = 0.173213

Thermal correction to Gibbs Free Energy = 0.117914

**PhSiH<sub>3</sub>**

|    |          |          |          |
|----|----------|----------|----------|
| Si | 2.34556  | 0.00017  | 0.00632  |
| H  | 2.84764  | 1.28868  | -0.53476 |
| H  | 2.86433  | -1.12215 | -0.81665 |
| H  | 2.87708  | -0.16266 | 1.38527  |
| C  | 0.46674  | 0.00007  | -0.01375 |
| C  | -0.25603 | -1.20438 | -0.01066 |
| C  | -0.25571 | 1.20404  | -0.0107  |
| C  | -1.64916 | -1.20617 | 0.00337  |
| H  | 0.26906  | -2.15597 | -0.02401 |
| C  | -1.64966 | 1.20565  | 0.00323  |
| H  | 0.27002  | 2.15498  | -0.02392 |
| C  | -2.34849 | 0.00002  | 0.01133  |
| H  | -2.18885 | -2.14812 | 0.00441  |
| H  | -2.18924 | 2.14766  | 0.004    |
| H  | -3.434   | -0.00022 | 0.02013  |

Zero-point correction = 0.115044

Thermal correction to Enthalpy = 0.125703

Thermal correction to Gibbs Free Energy = 0.075617

## 10. References

- [1] a) Wang, Y.; Benten, H.; Ohara, S.; Kawamura, D.; Ohkita, H.; Ito, S. *ACS Appl. Mater. Interfaces* **2014**, *6*, 14108–14115. b) Wang, C.; Teo, W. J.; Ge, S. *ACS Catal.* **2017**, *7*, 855–863. c) Kozikowski, A. P.; Gaisina, I. N.; Yuan, H.; Petukhov, P. A.; Blond, S. Y.; Fedolak, A.; Caldarone, B.; McGonigle, P. *J. Am. Chem. Soc.* **2007**, *129*, 8328–8332. d) Molnár, I. G.; Gilmour, R. *J. Am. Chem. Soc.* **2016**, *138*, 5004–5007. e) Ma, J. B.; Zhao, X.; Zhang, D.; Shi, S. L.; *J. Am. Chem. Soc.* **2022**, *144*, 13643–13651.
- [2] a) Visco, M. D.; Wieting, J. M.; Mattson, A. E. *Org. Lett.* **2016**, *18*, 2883–2885. b) Sakurai, H.; Shoji, M.; Yajima, M.; Hosomi, A. *Synthesis* **1984**, *7*, 598–600.
- [3] Cory J. W.; Megan T. D.; Joseph W. Z.; Andrew J. G.; Stosh, A. K.; William J. E. *Inorg. Chem.* **2017**, *56*, 11981–11989.
- [4] a) Cai, L.; Chen, Y.; Cao, H.; Wei, Q.; Yang, Y.; Ouyang, Q.; Peng, Y. *Org. Lett.* **2019**, *21*, 7597–7601; b) Yamashita, Y.; Noguchi, A.; Fushimi, S.; Hatanaka M.; Kobayashi, S. *J. Am. Chem. Soc.* **2021**, *143*, 5598–5604. c) Walli, A.; Dechert, S.; Meyer, F. *Eur. J. Org. Chem.*, **2013**, 7044–7049.
- [5] Den Haan, K. H.; Wielstra, Y.; Teuben, J. H. *Organometallics* **1987**, *6*, 2053–2060.
- [6] Salvi, N. A.; Chattopadhyay, S. *Tetrahedron* **2001**, *57*, 2833–2839.
- [7] a) Sheldrick, G. M. *Acta Cryst.* **2008**, *A64*, 112–122. b) Sheldrick, G. M. *Acta Cryst.* **2015**, *A71*, 3–8. c) Sheldrick, G. M. *Acta Cryst.* **2015**, *C71*, 3–8. d) Dolomanov, O. V.; Bourhis, L. J.; Gildea, R. J.; Howard, J. A. K.; Puschmann, H. *J. Appl. Cryst.* **2009**, *42*, 339–341. e) Spek, A. L. *J. Appl. Cryst.* **2003**, *36*, 7–13.
- [8] a) Cheng, B.; Lu, P.; Zhang, H.; Cheng X.; Lu, Z. *J. Am. Chem. Soc.* **2017**, *139*, 9439–9442. b) Wang, C.; Teo, W.; Ge, S.; *ACS Catal.* **2017**, *7*, 855–863. c) Hu, M. Y.; He, Q.; Fan, S. J.; Wang, Z. C.; Liu, L. Y.; Mu, Y. J.; Peng, Q.; Zhu, S. F. *Nat. Commun.* **2018**, *9*, 221–231. d) Li, Y. Y.; Yu, S. L.; Wu, X. F.; Xiao, J. L.; Shen, W. Y.; Dong, Z. R.; Gao J. X. *J. Am. Chem. Soc.* **2014**, *136*, 4031–4039. e) Xie, W. L.; Hu, H. F.; Cui, C. M. *Angew. Chem. Int. Ed.* **2012**, *51*, 11141–11144.
- [9] a) Frisch, M. J.; Trucks, G. W.; Schlegel, H. B.; Scuseria, G. E.; Robb, M. A.; Cheeseman, J. R.; Scalmani, G.; Barone, V.; Petersson, G. A.; Nakatsuji, H.; Li, X.; Caricato, M.; Marenich, A. V.; Bloino, J.; Janesko, B. G.; Gomperts, R.; Mennucci, B.; Hratchian, H. P.; Ortiz, J. V.; Izmaylov, A. F.; Sonnenberg, J. L.; Williams, F.; Ding, F.; Lipparini, E.; Egidi, F.; Goings, J.; Peng, B.; Petrone, A.; Henderson, T.; Ranasinghe, D.; Zakrzewski, V. G.; Gao, J.; Rega, N.; Zheng, G.; Liang, W.; Hada, M.; Ehara, M.; Toyota, K.; Fukuda, R.; Hasegawa, J.; Ishida, M.; Nakajima, T.; Honda, Y.; Kitao, O.; Nakai, H.; Vreven, T.; Throssell, K.; Montgomery Jr., J. A.; Peralta, J. E.; Ogliaro, F.; Bearpark, M. J.; Heyd, J. J.; Brothers, E. N.; Kudin, K. N.; Staroverov, V. N.; Keith, T. A.; Kobayashi, R.; Normand, J.; Raghavachari, K.; Rendell, A. P.; Burant, J. C.; Iyengar, S. S.; Tomasi, J.; Cossi, M.; Millam, J. M.; Klene, M.; Adamo, C.; Cammi, R.; Ochterski, J. W.; Martin, R. L.; Morokuma, K.; Farkas, O.; Foresman, J. B.; Fox, D. J.; Gaussian 09, Rev. D.01; Gaussian, Inc., Wallingford CT, 2013.9. b) Stephens, P. J.; Devlin, F. J.; Chabalowski, C. F.; Frisch, M. J. *J. Phys. Chem.*, **1994**, *98*, 11623–11627. c) Goerigk, L.; Grimme, S. A. *Phys. Chem. Chem. Phys.*, **2011**, *13*, 6670–6688. d) Dolg, M.; Wedig, U.; Stoll, H.; Preuss, H.; *J. Chem. Phys.*, **1987**, *86*, 866–872. e) McLean, A. D.; Chandler, G. S. *J. Chem. Phys.*, **1980**, *72*, 5639–5648. f) McGrath M. P.; Radom, L. *J. Chem. Phys.*, **1991**, *94*, 511–516. g) Curtiss, L. A.; McGrath, M. P.; Blaudeau, J. P. *J. Chem. Phys.*, **1995**, *103*, 6104–6113. h) Dolg, M.; Stoll, H.; Savin A.; Preuss, H. *Theor. Chim. Acta*, **1989**, *75*, 173–194. i) Dolg, M.; Stoll H.; Preuss, H. *Theor. Chim. Acta*, **1993**, *85*, 441–450. j) Clark, T.; Chandrasekhar, J.; Spitznagel, G. W.; Schleyer, P. V. R.; *J. Comput. Chem.*, **1983**, *4*, 294–301. k) Legault, C. Y.; Université de Sherbrooke, 2009 (<http://www.cylview.org>) l) Tian, L.; Chen, Q.; *J. Comput. Chem.*, **2022**, *43*, 539–555. m) Tian, L.; Chen, F.; *J. Comput. Chem.*, **2012**, *33*, 580–592. n) Humphrey, W.; Dalke, A.; Schulten, K. *J. Molec. Graphics*, **1996**, *14*, 33–38.

## 11. Copies of NMR spectra for products

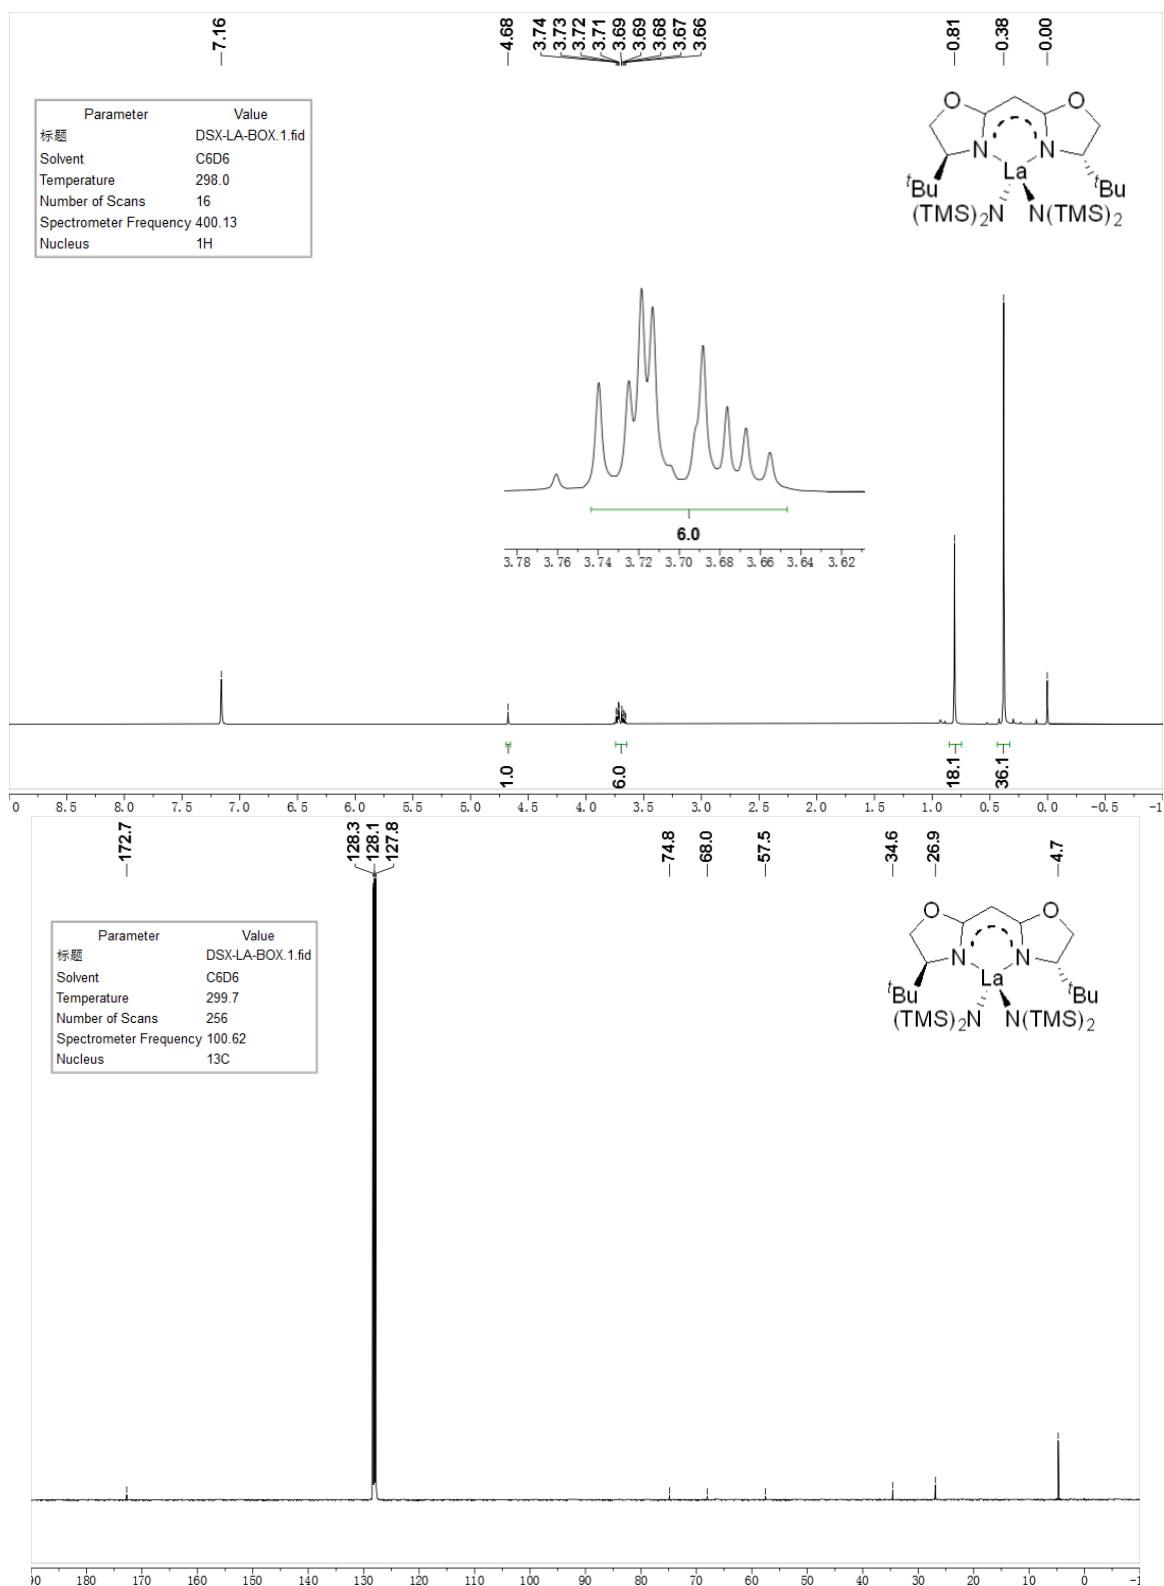

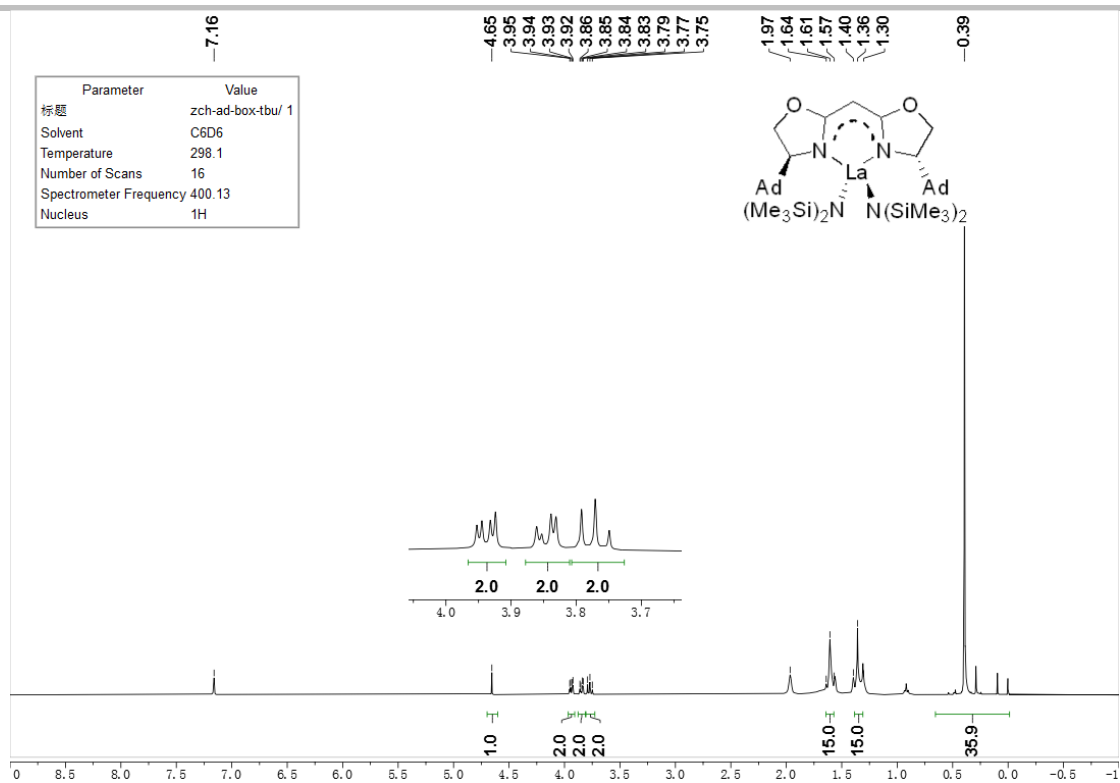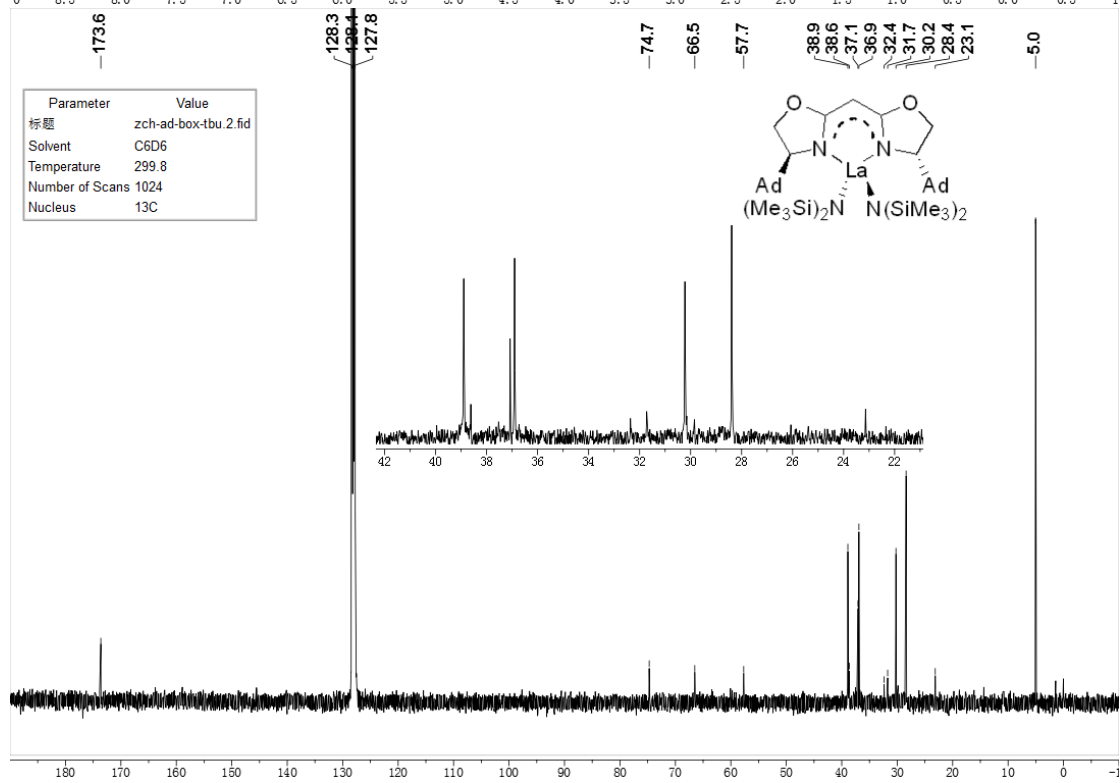



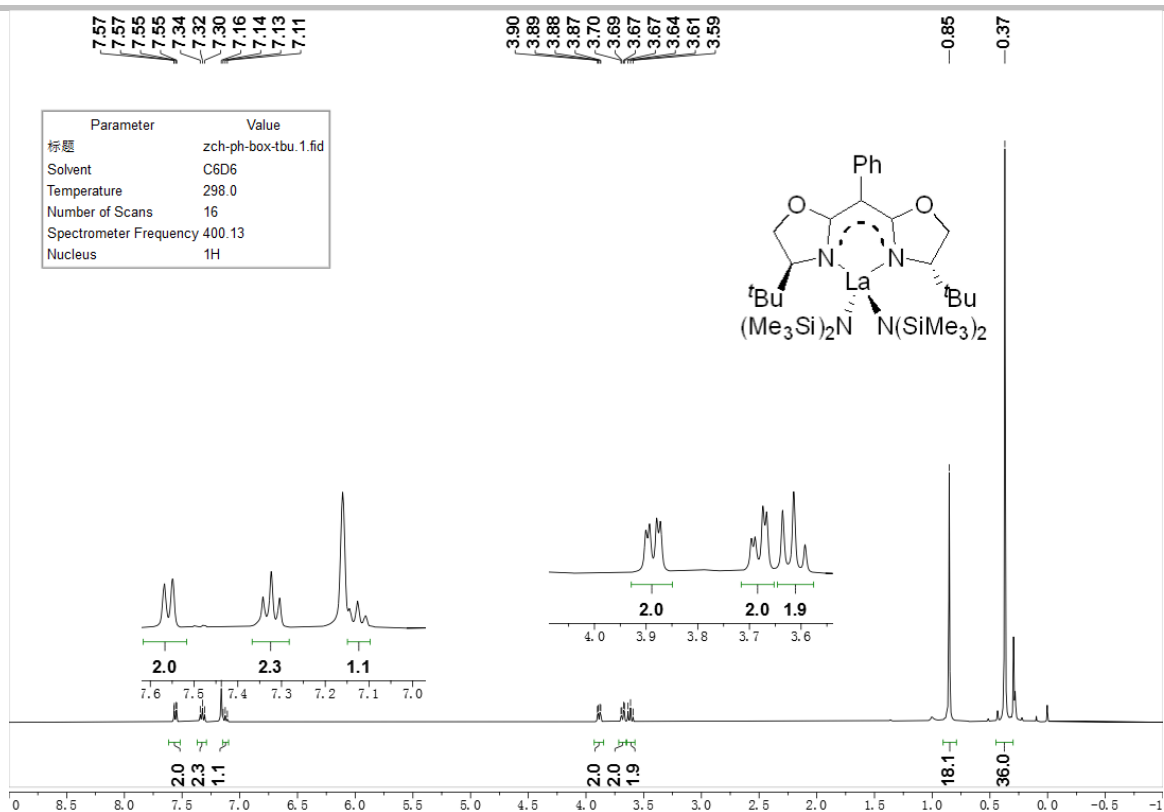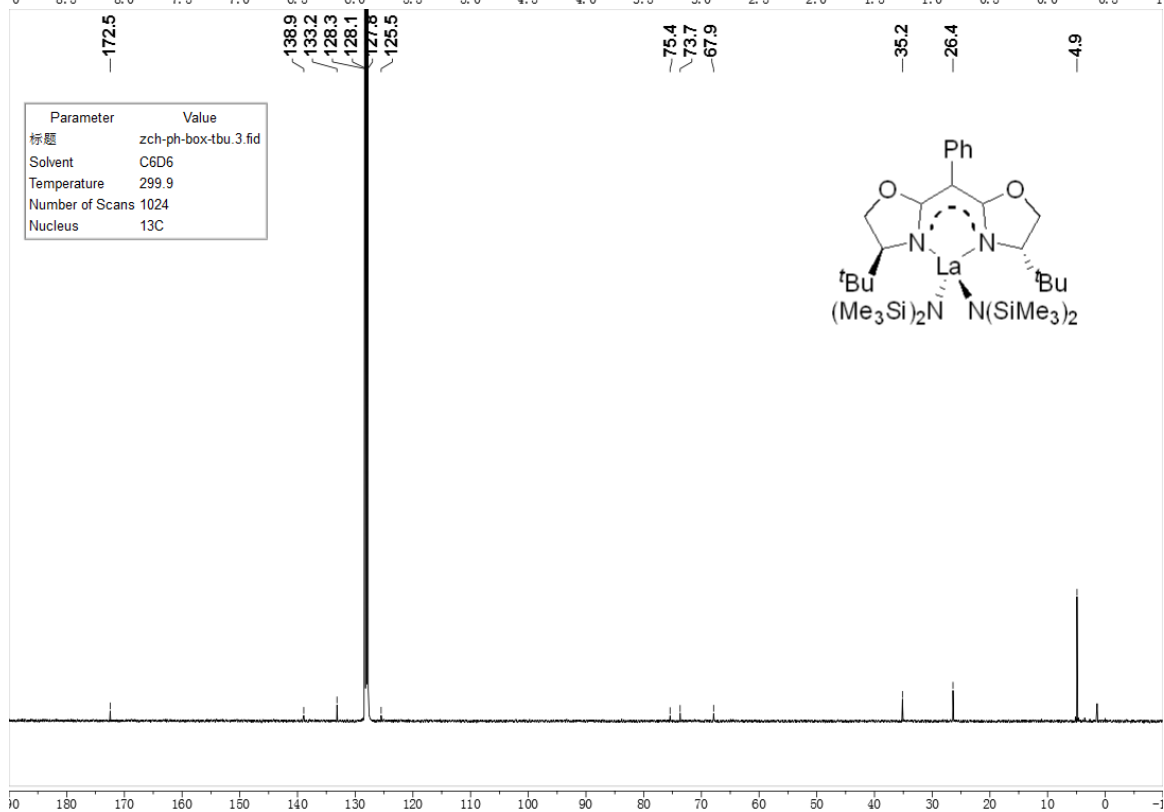

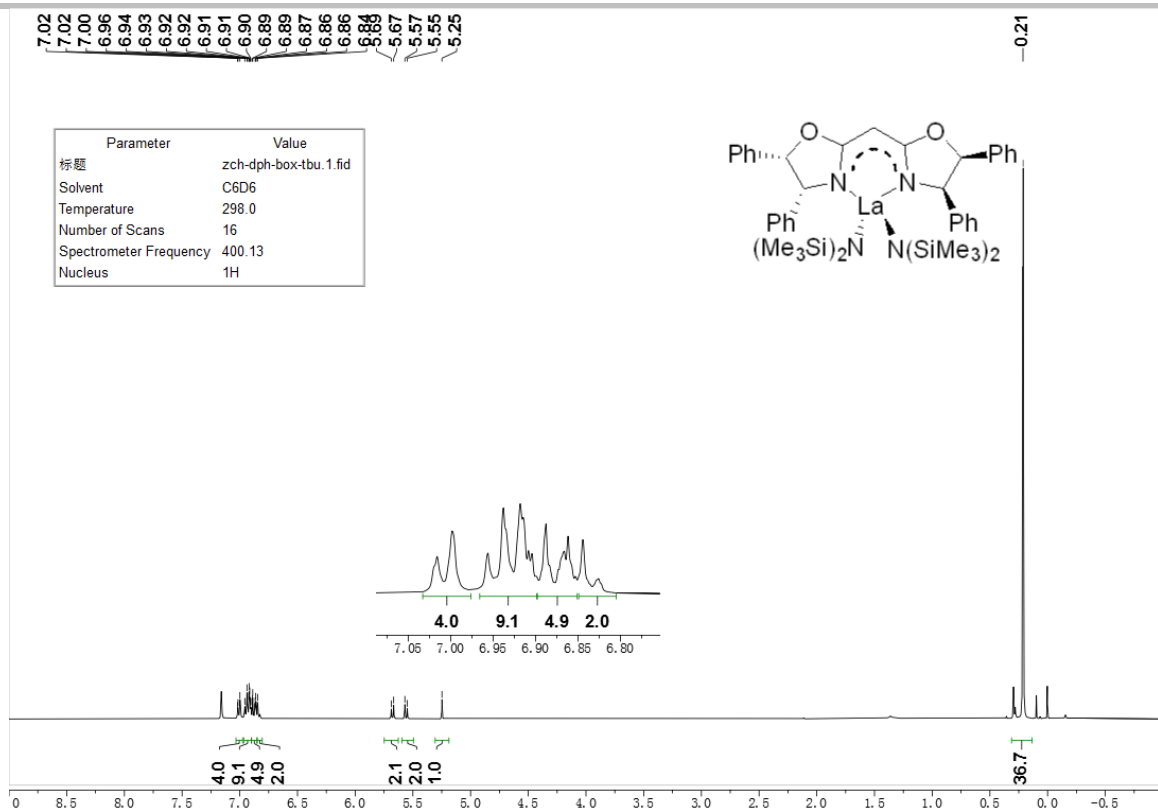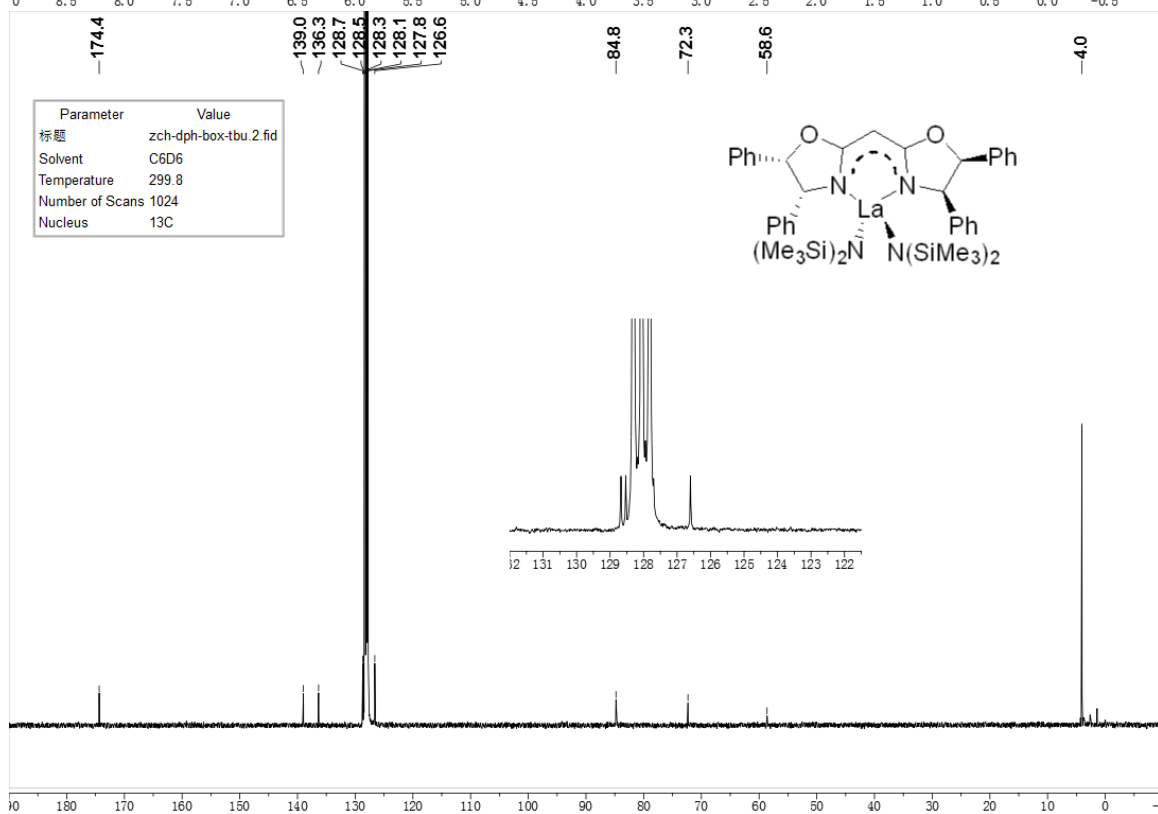

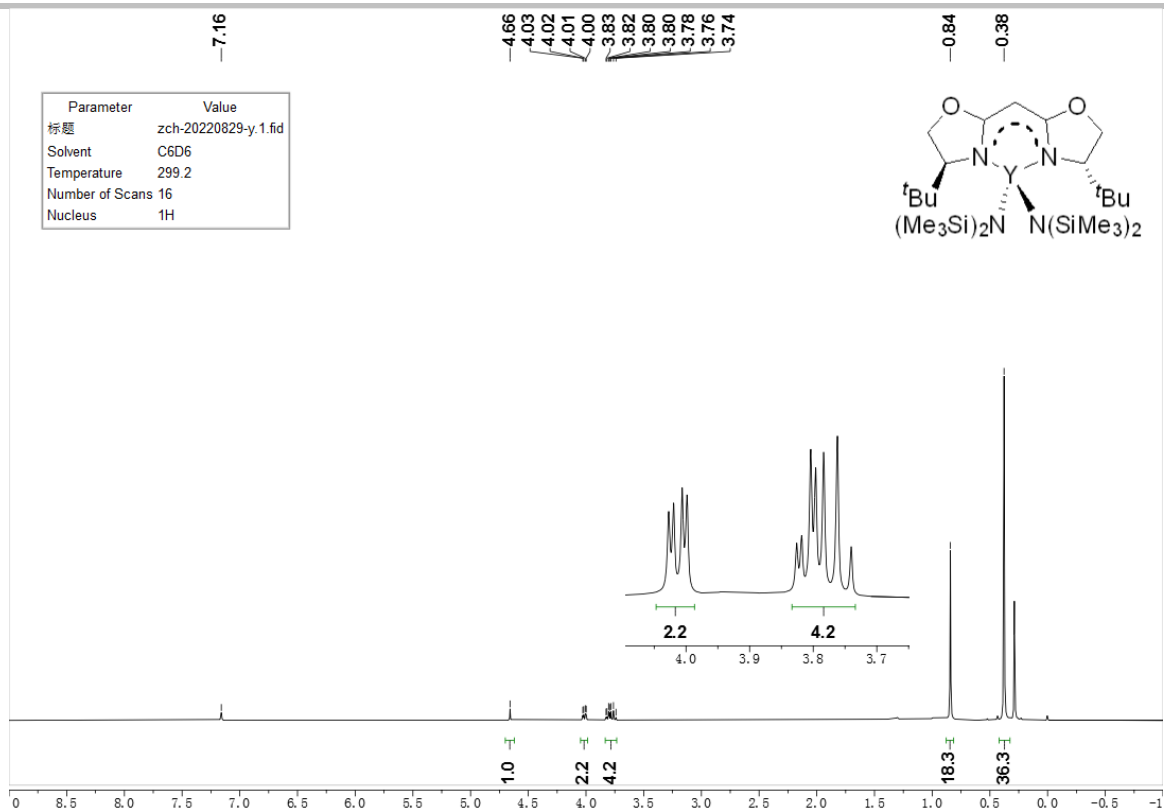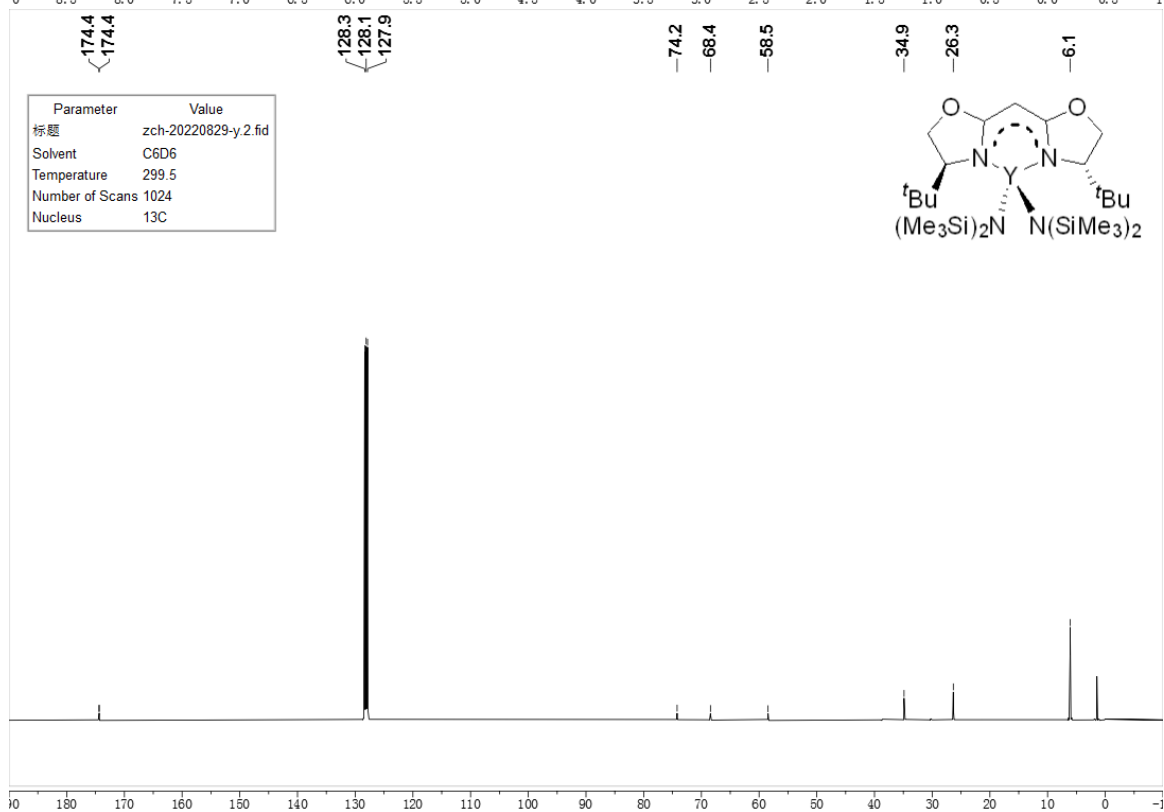

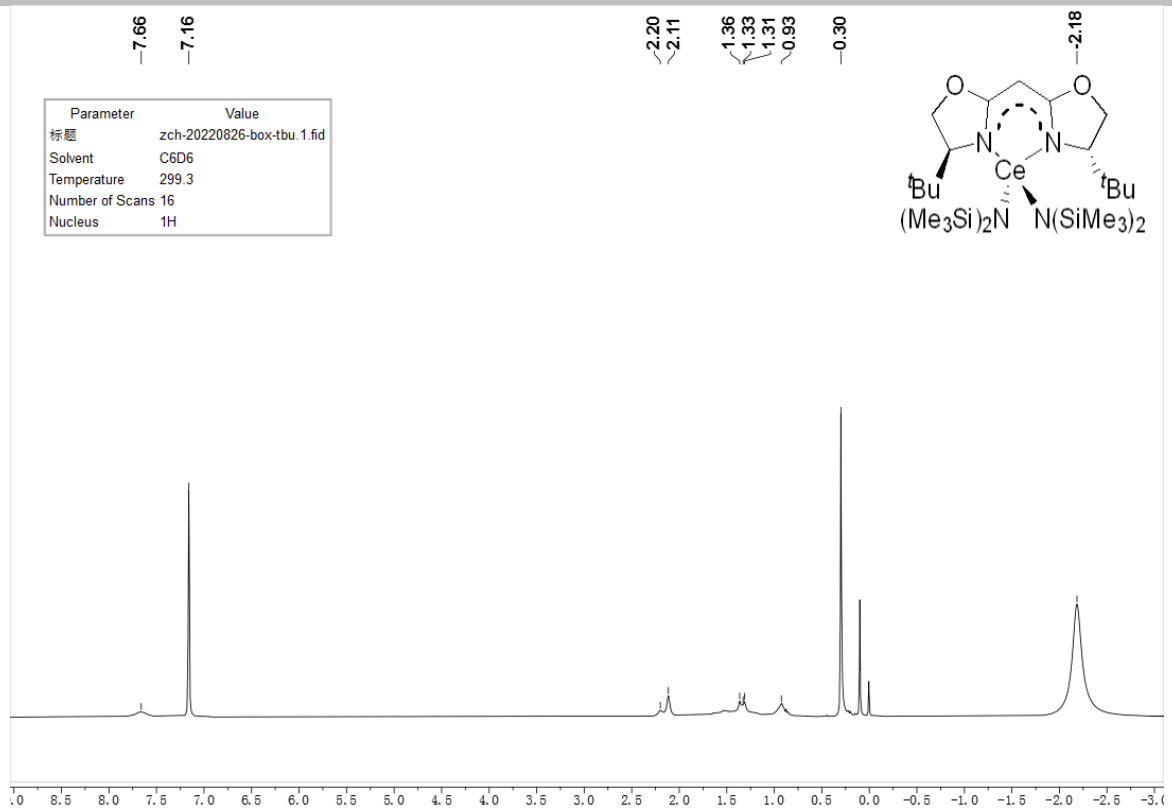

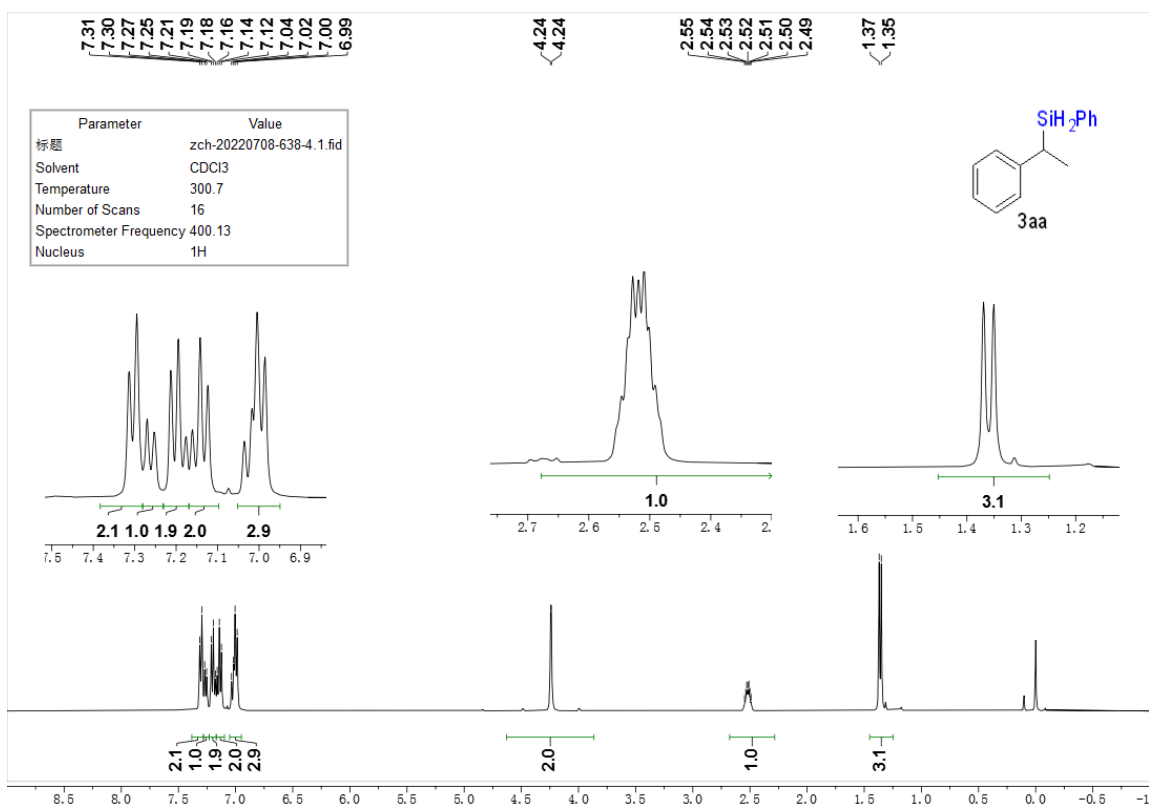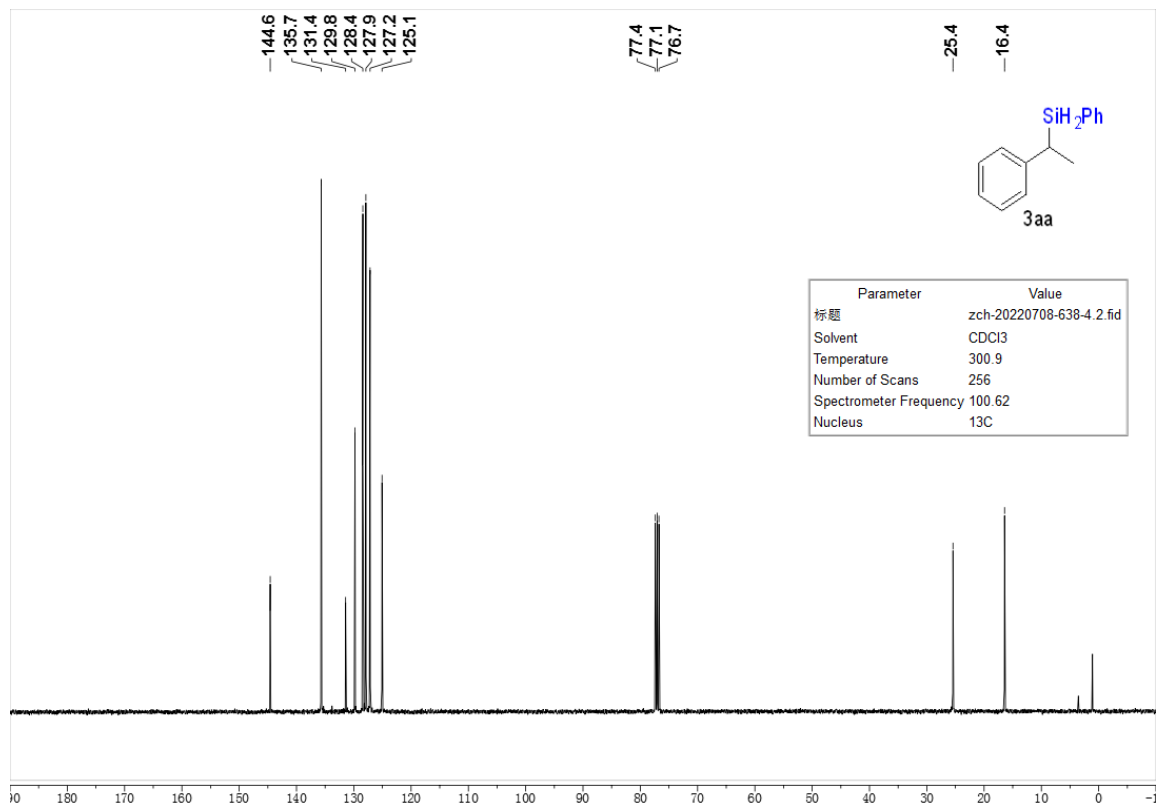

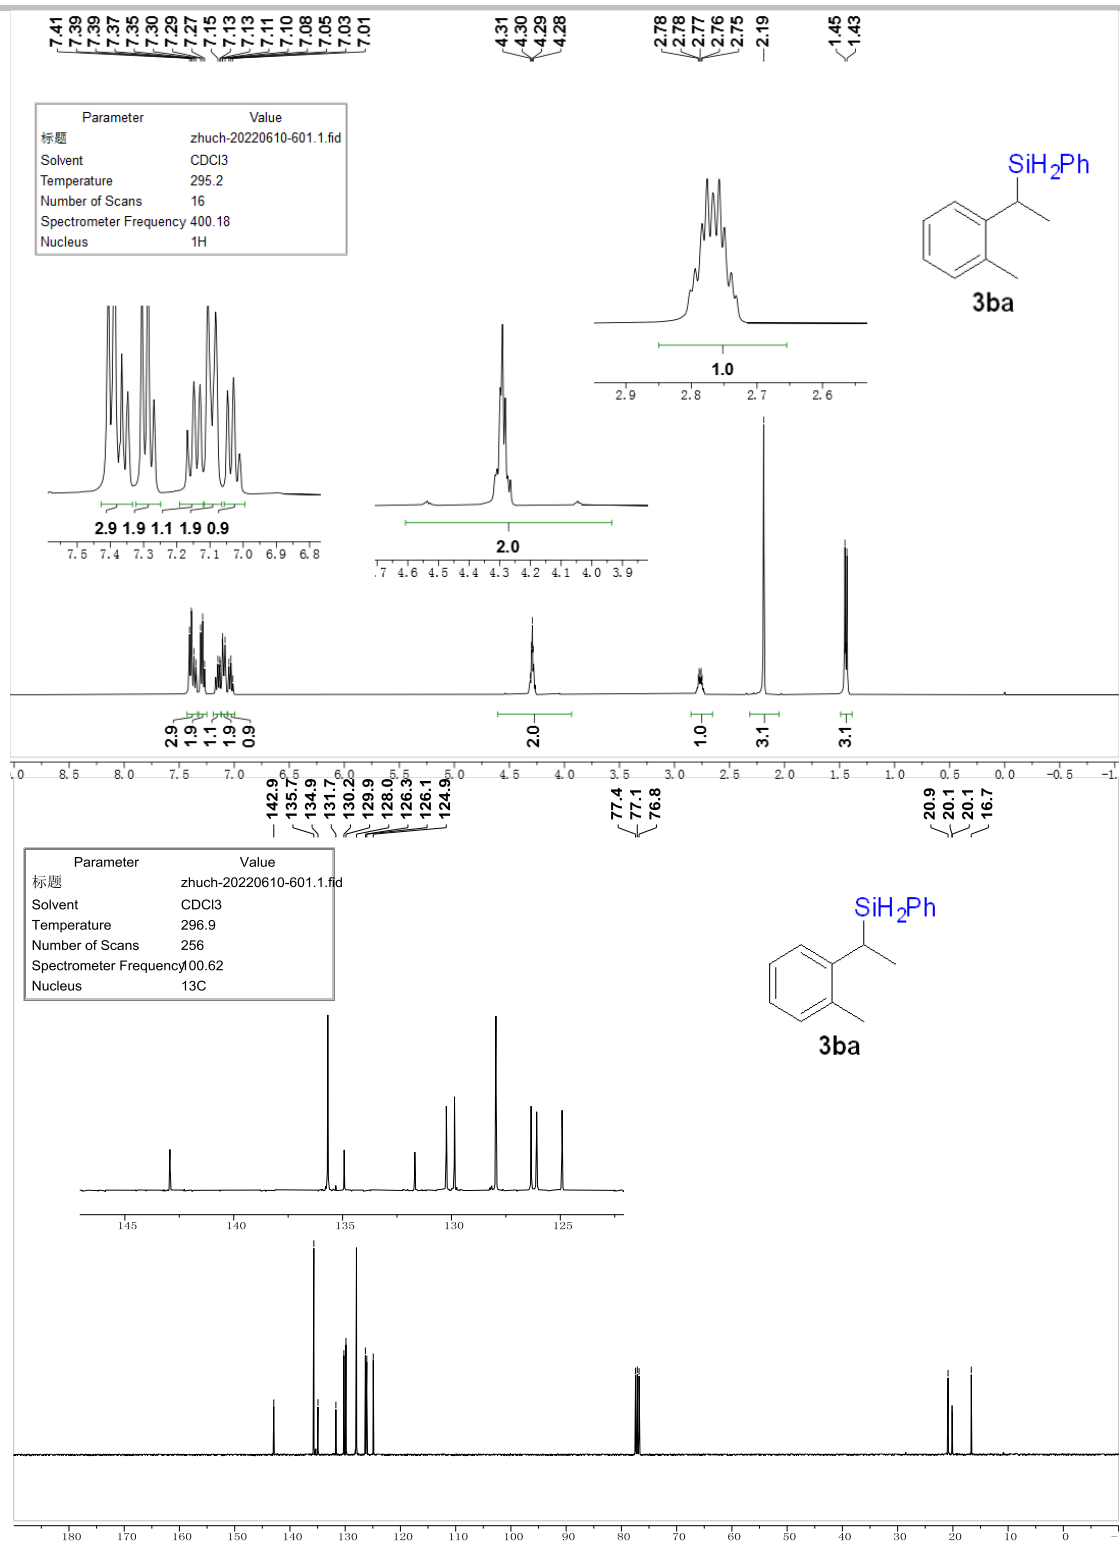

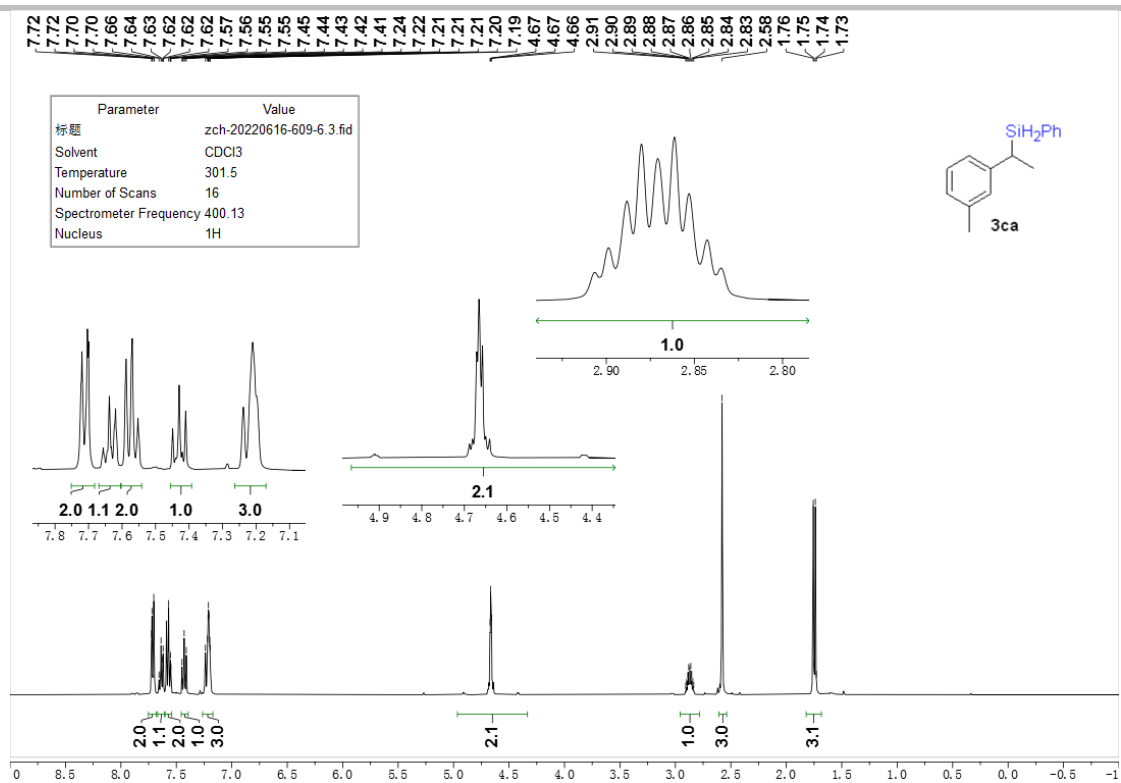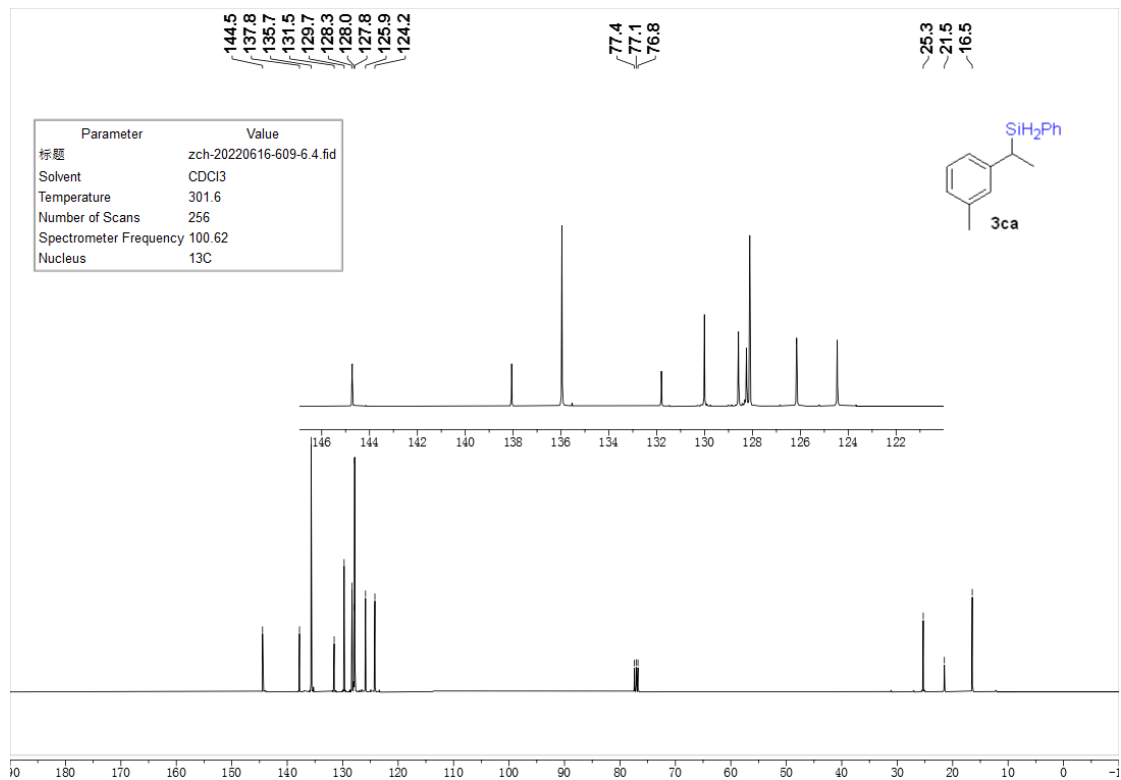

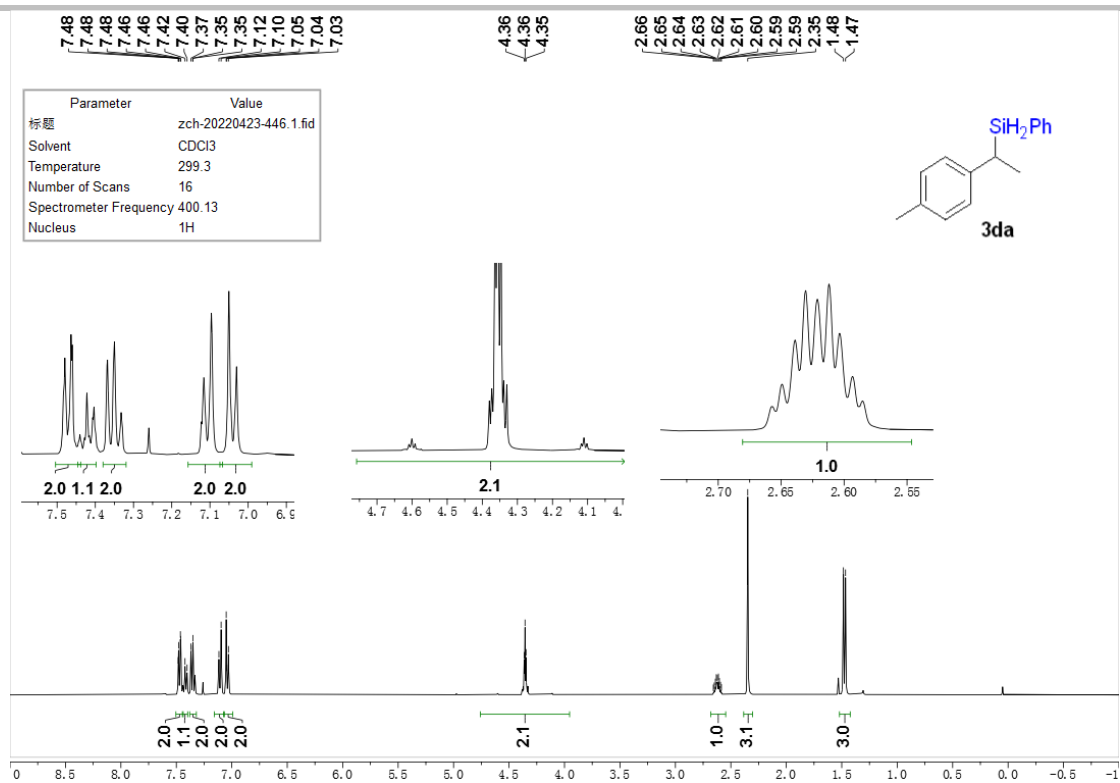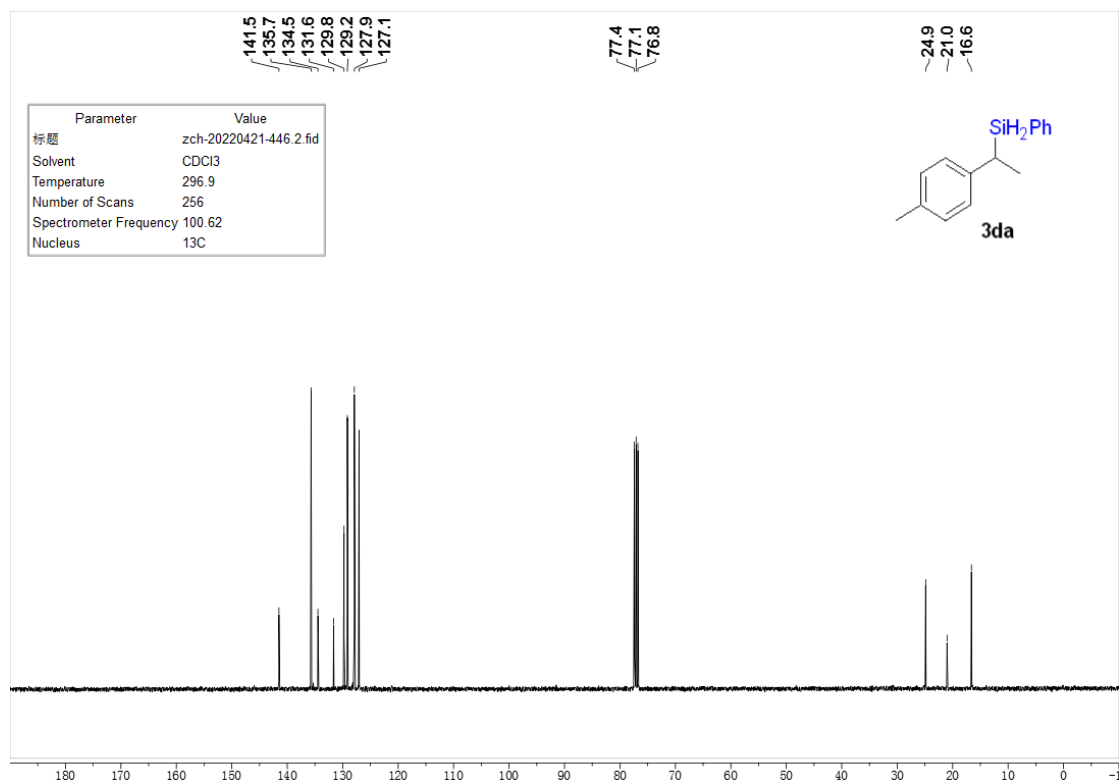



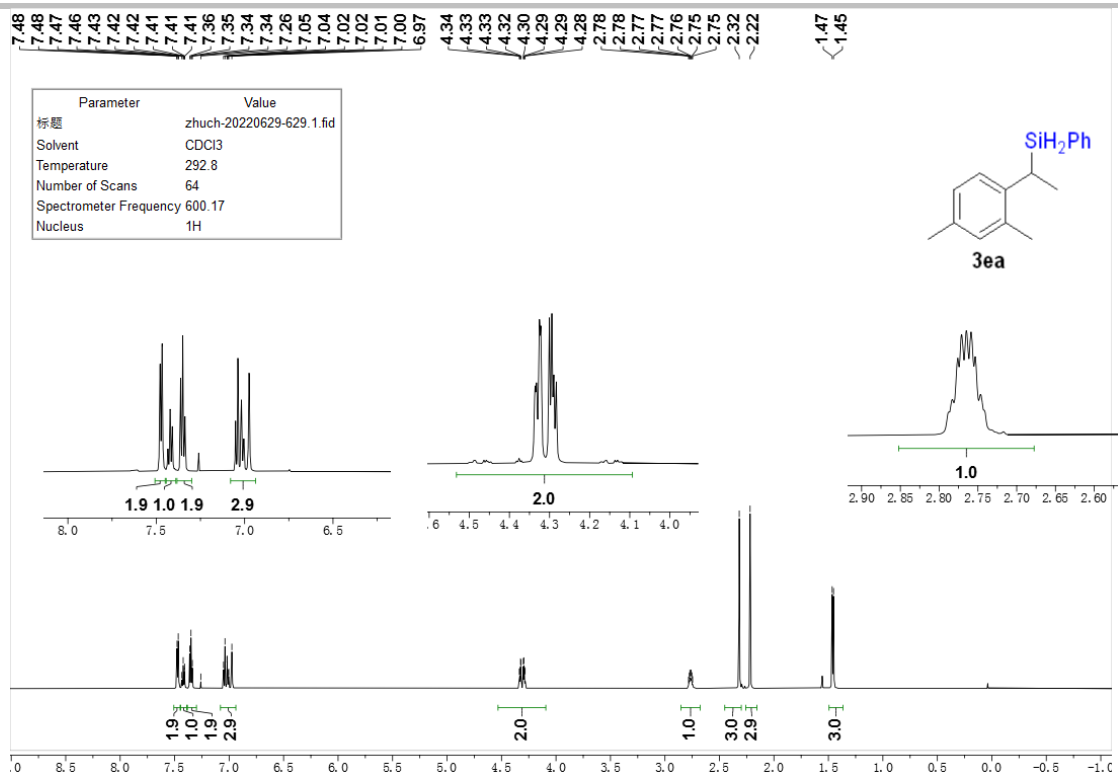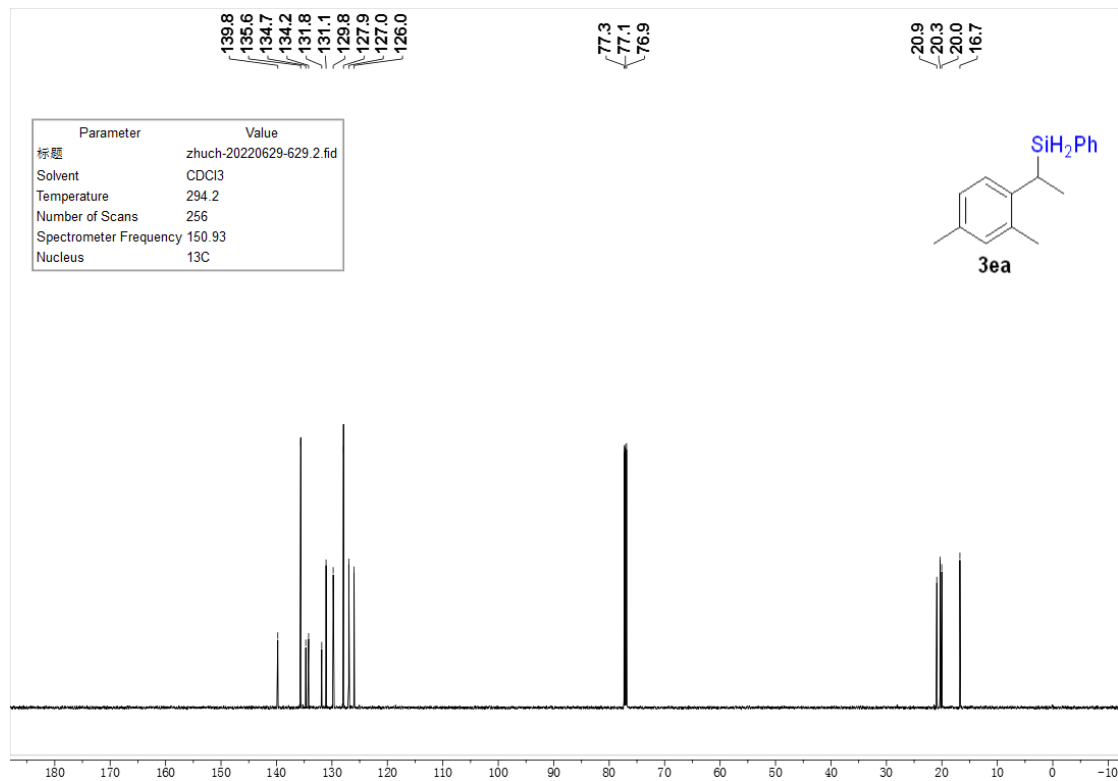

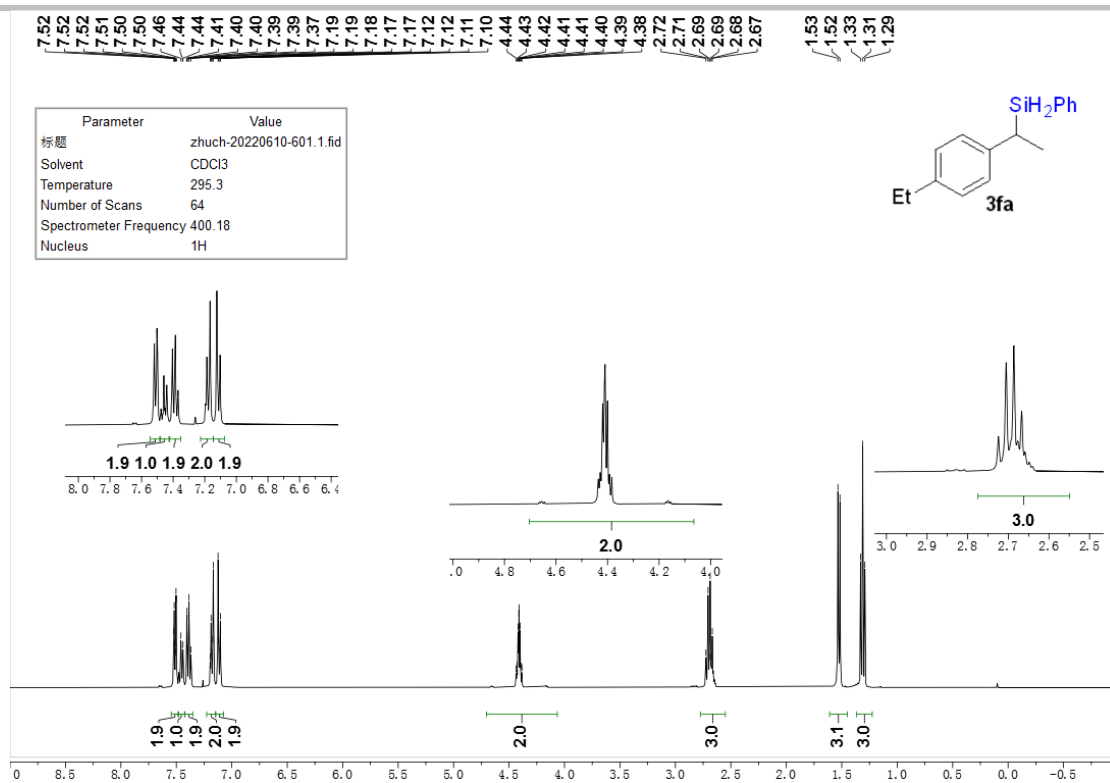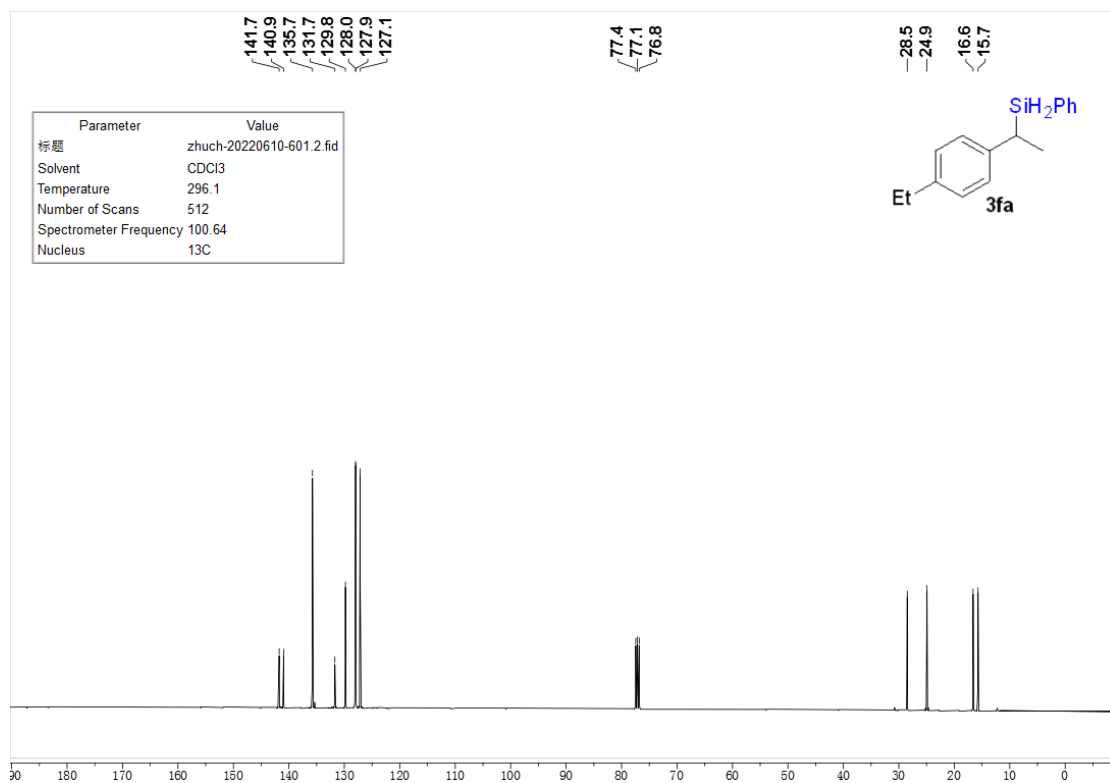

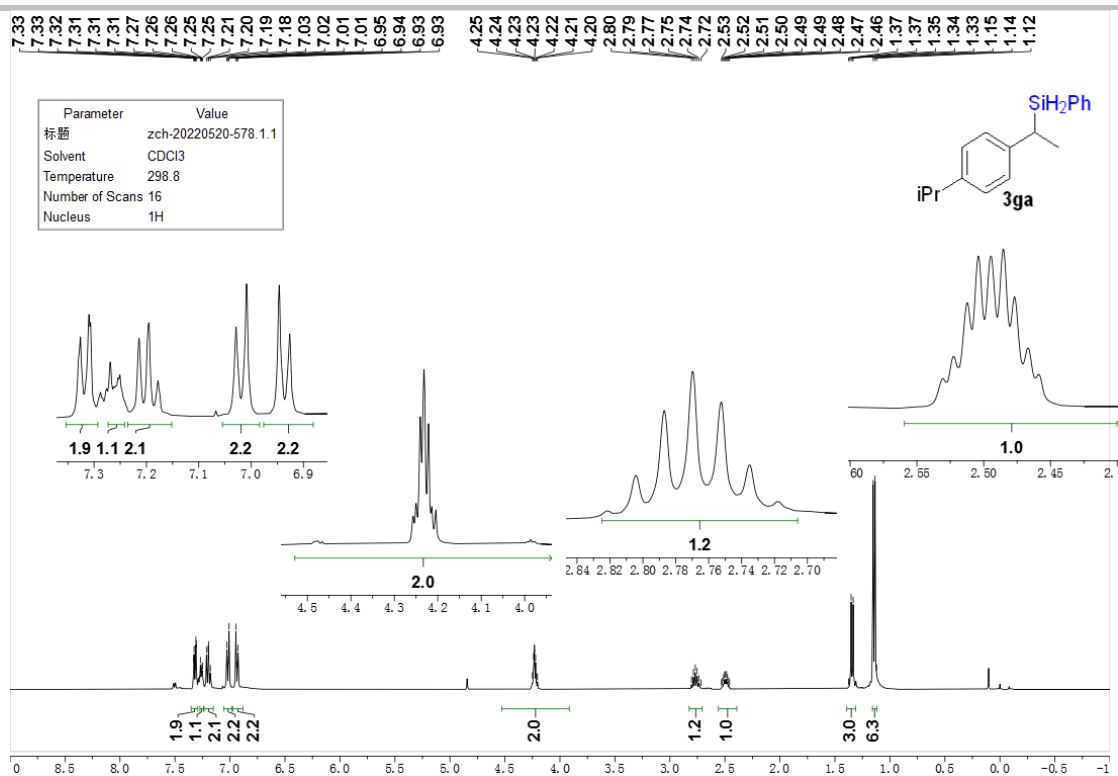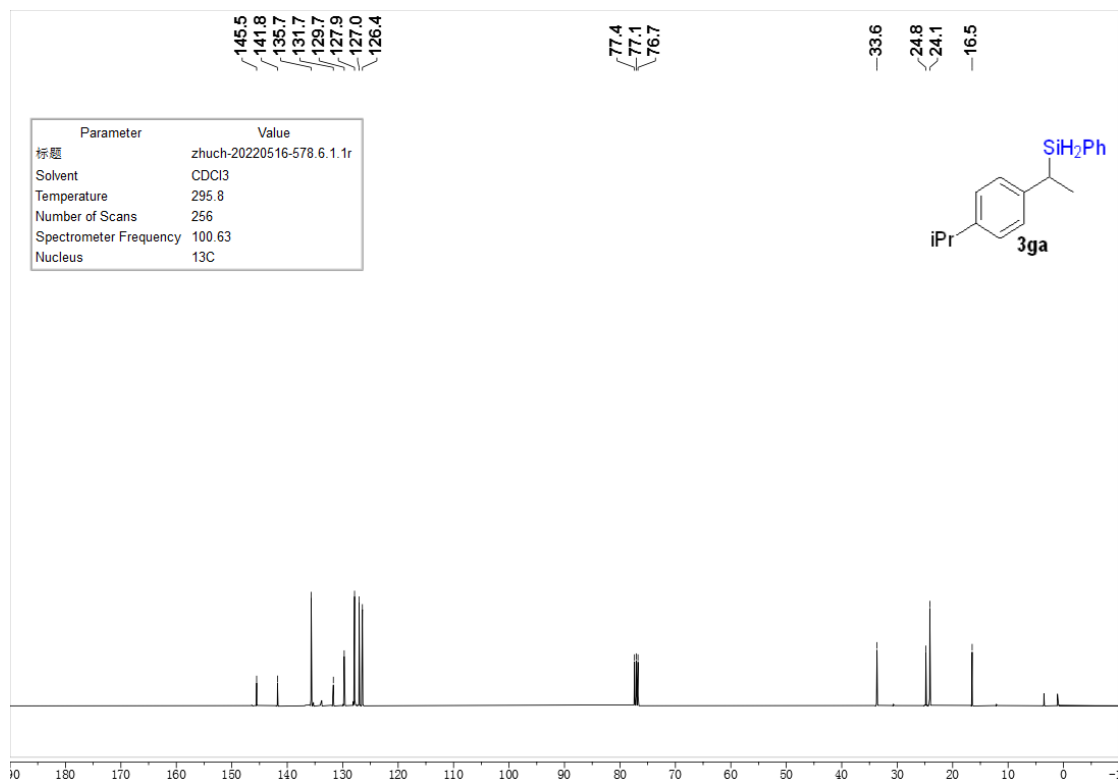

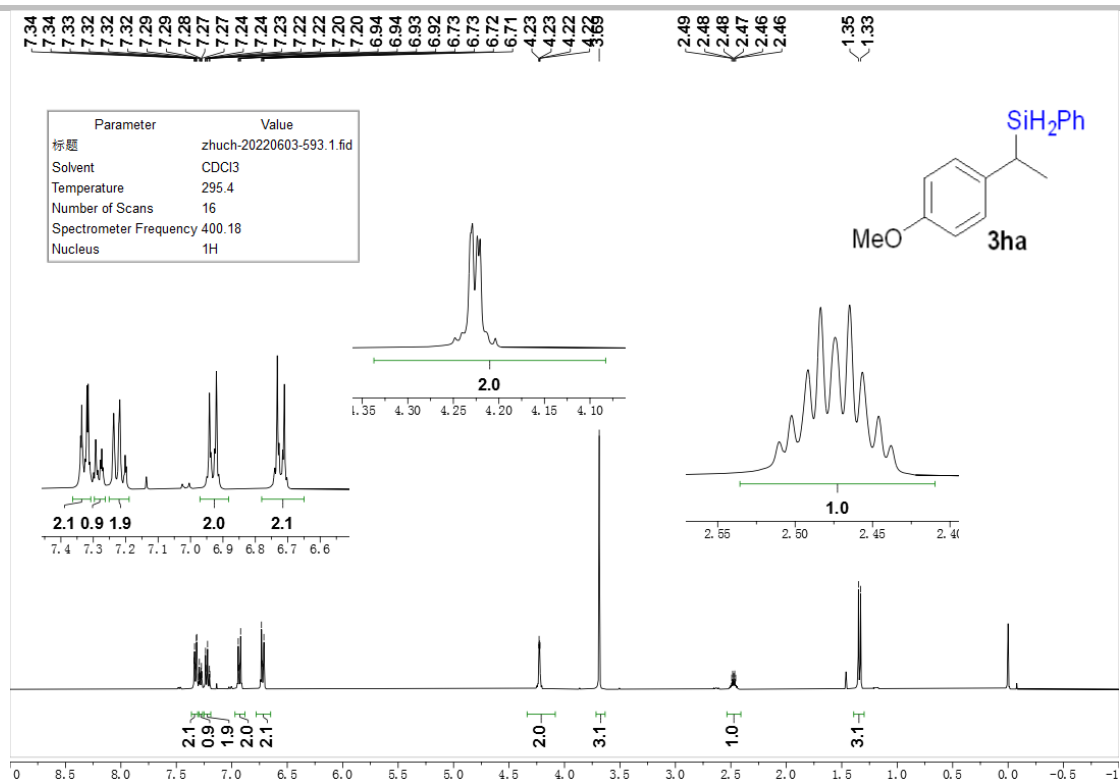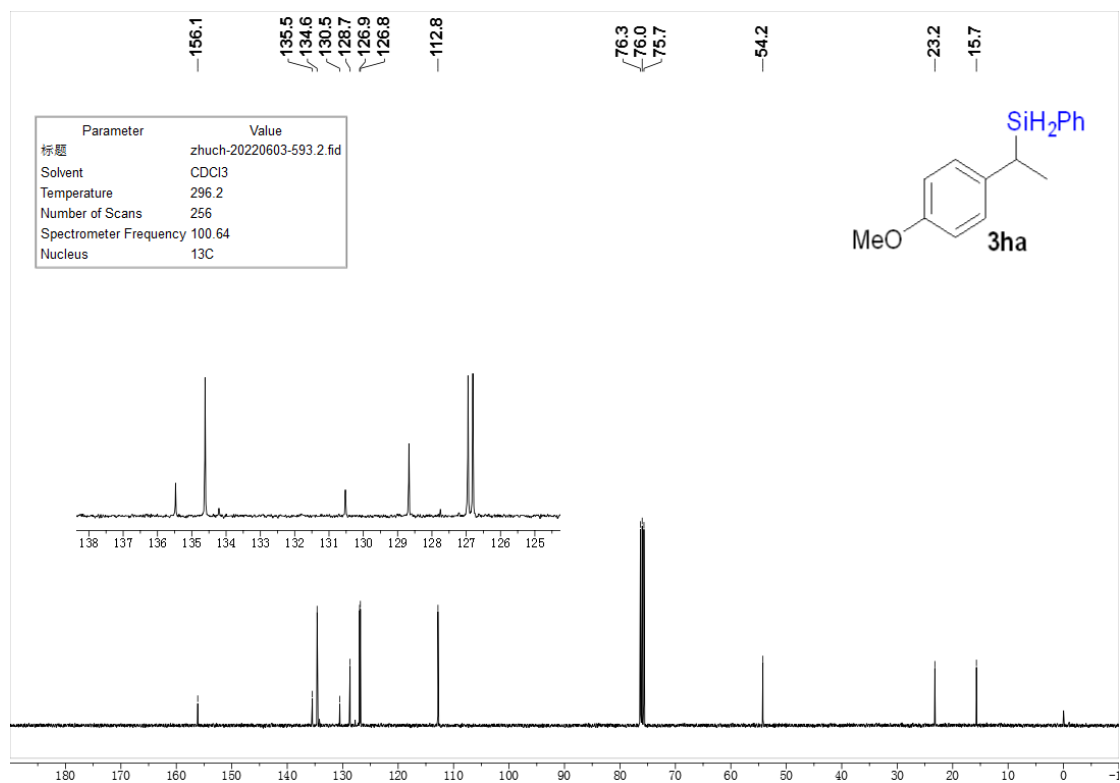

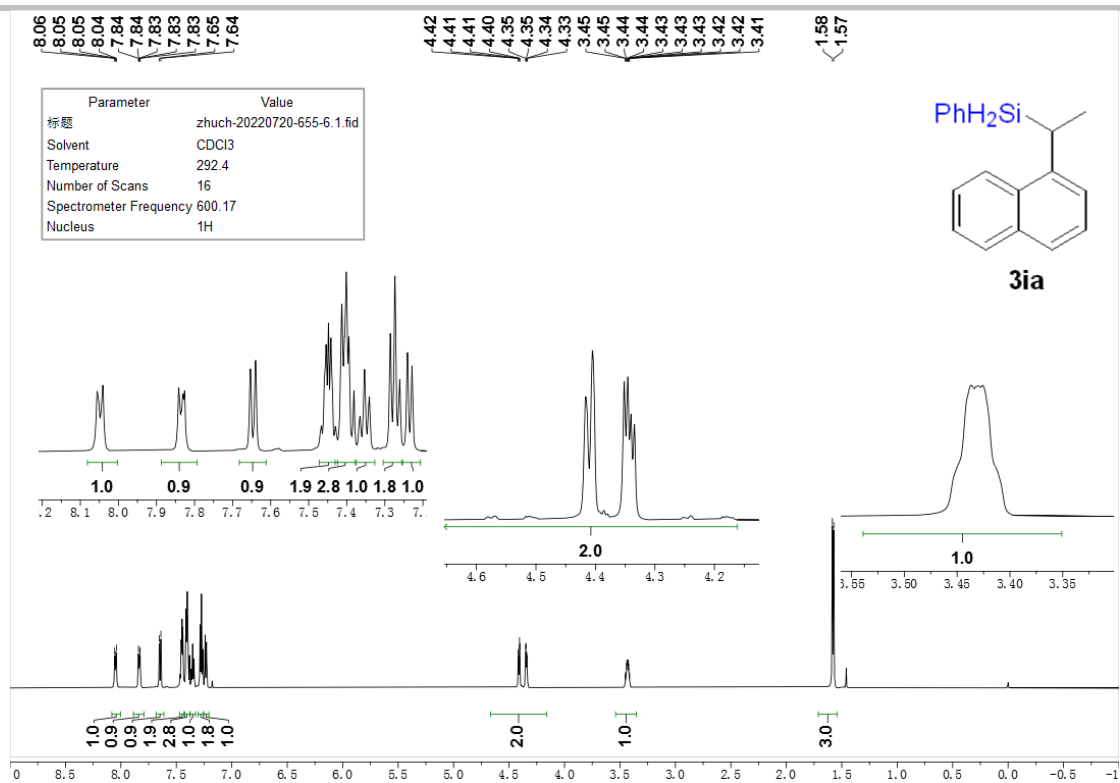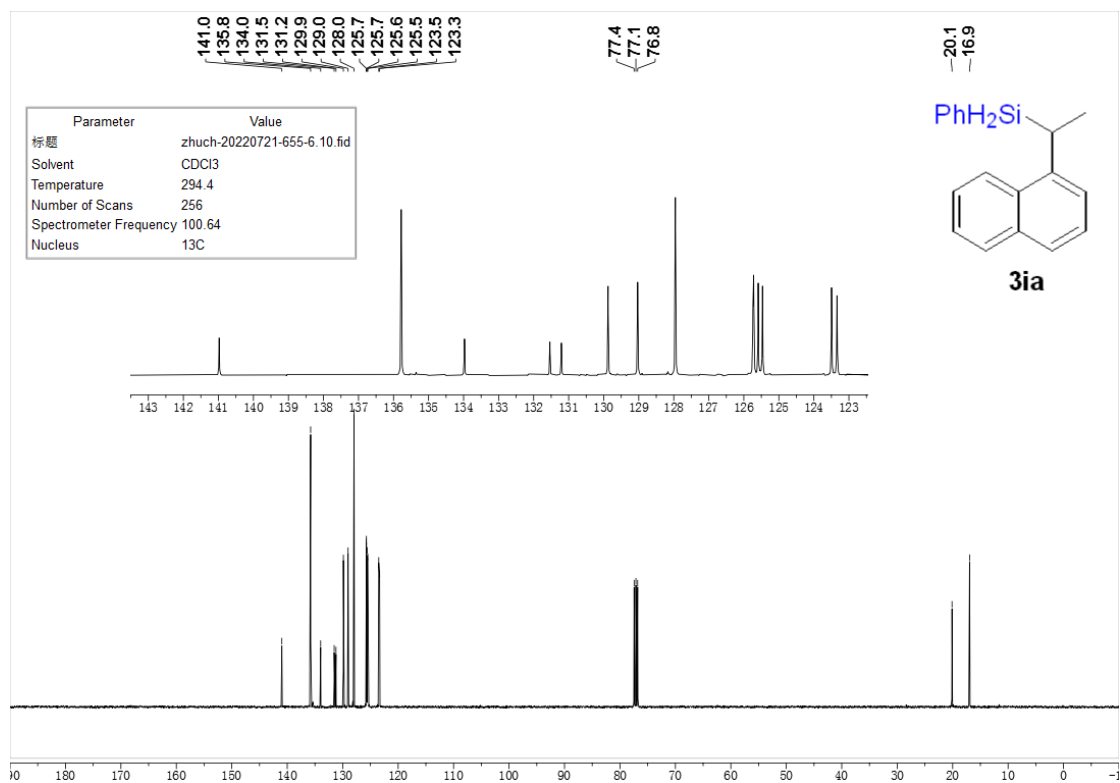

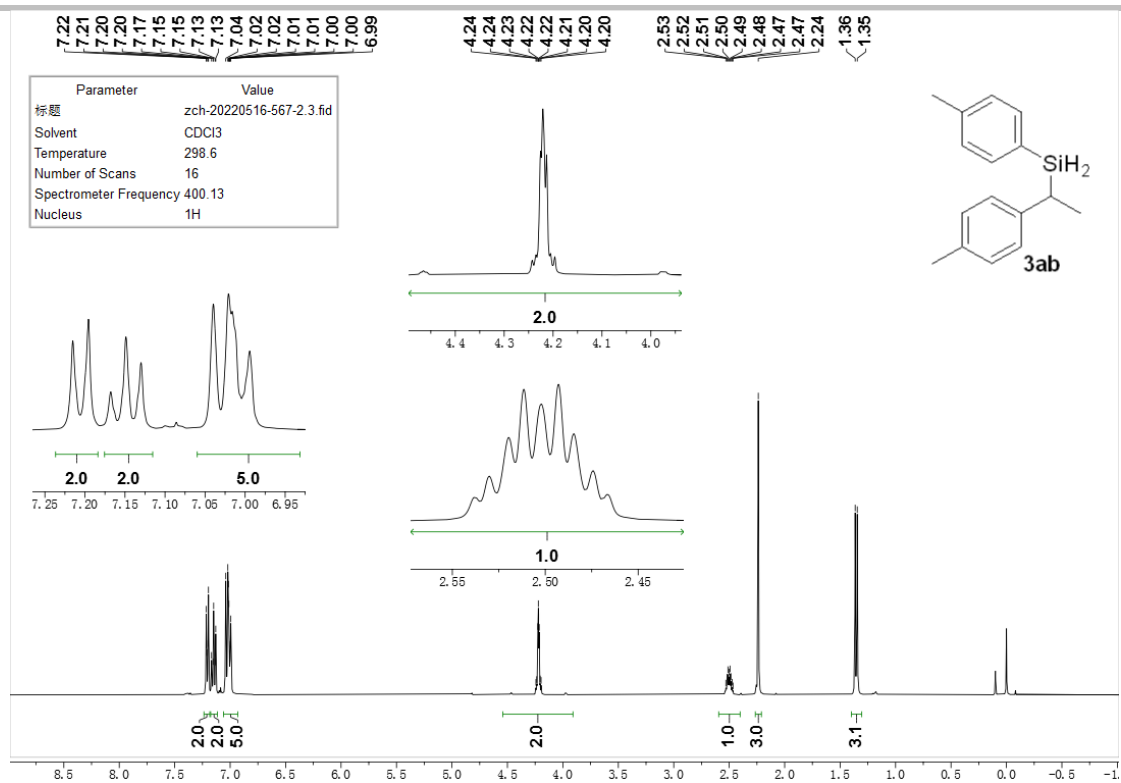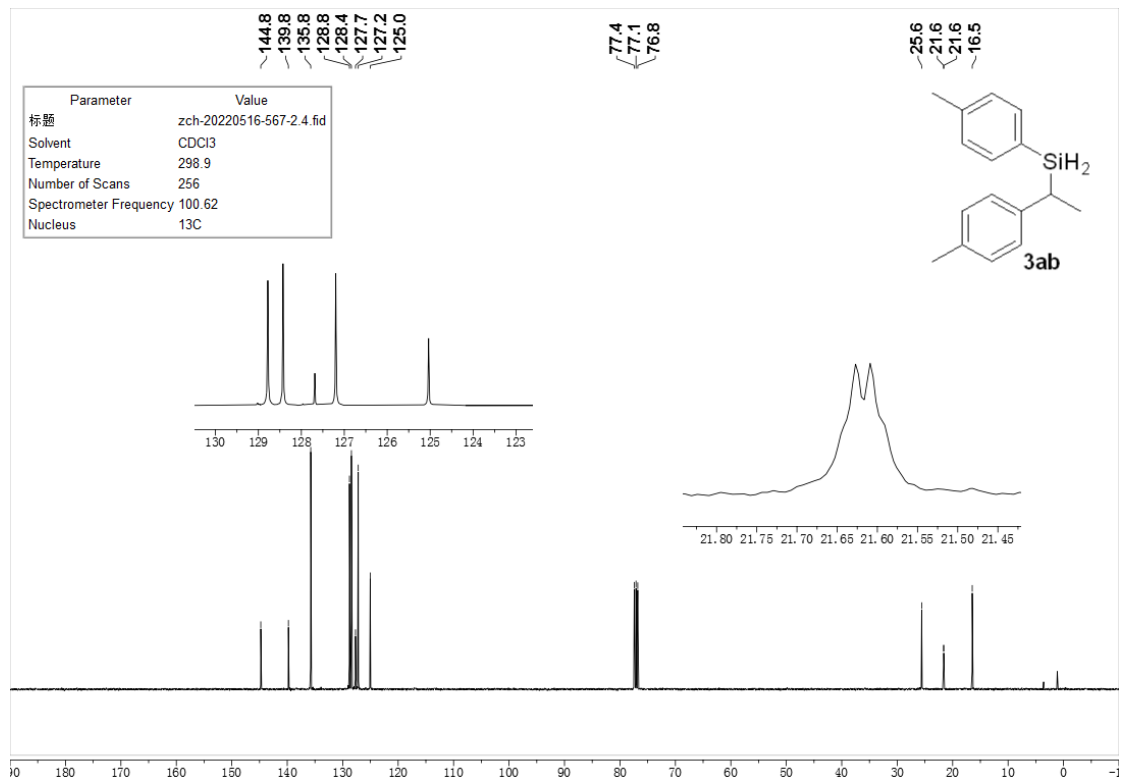

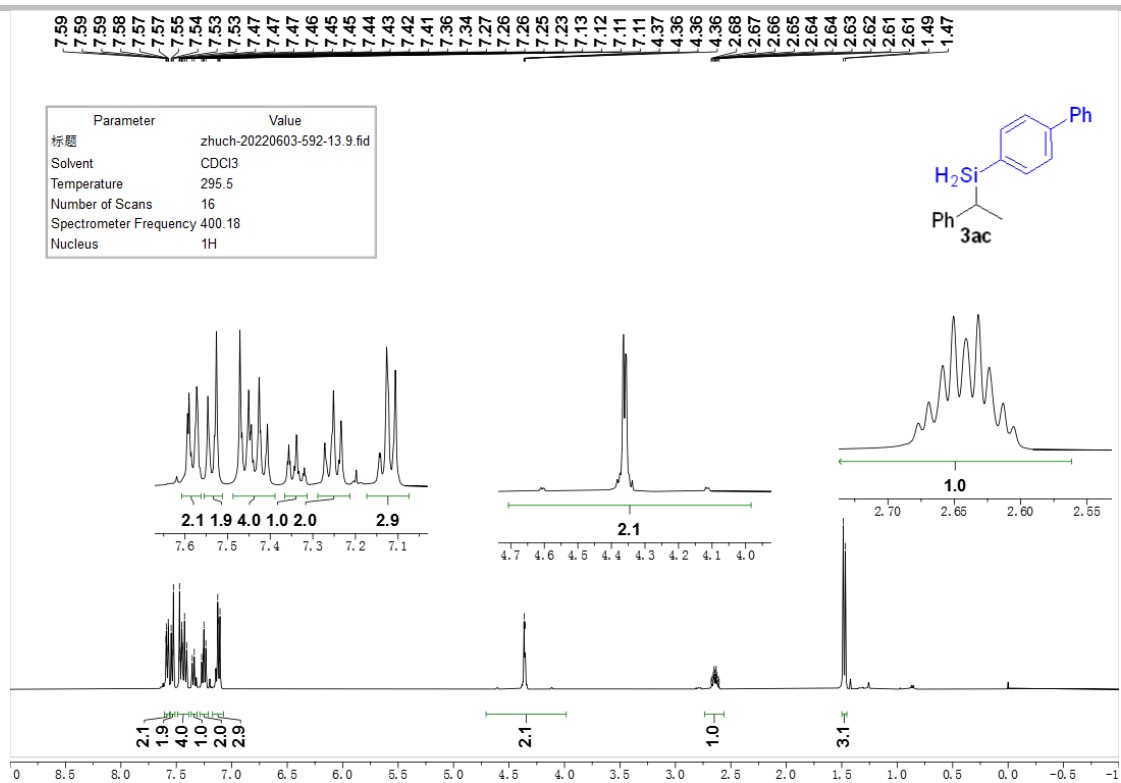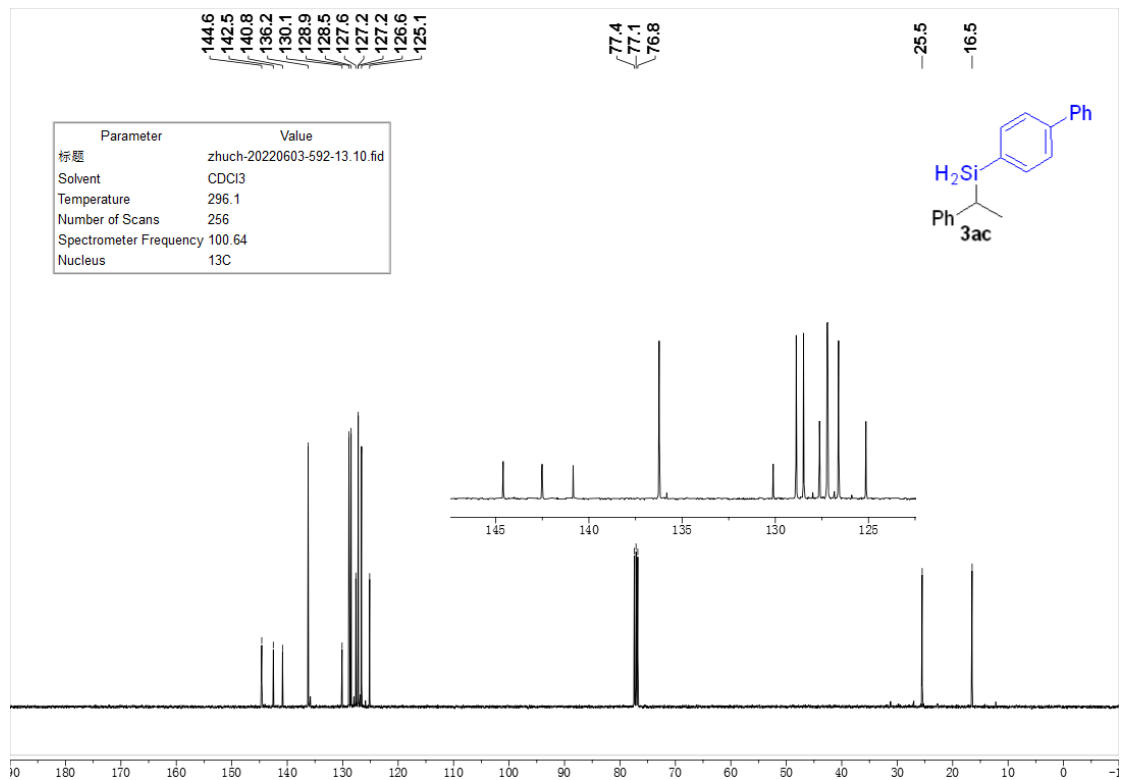

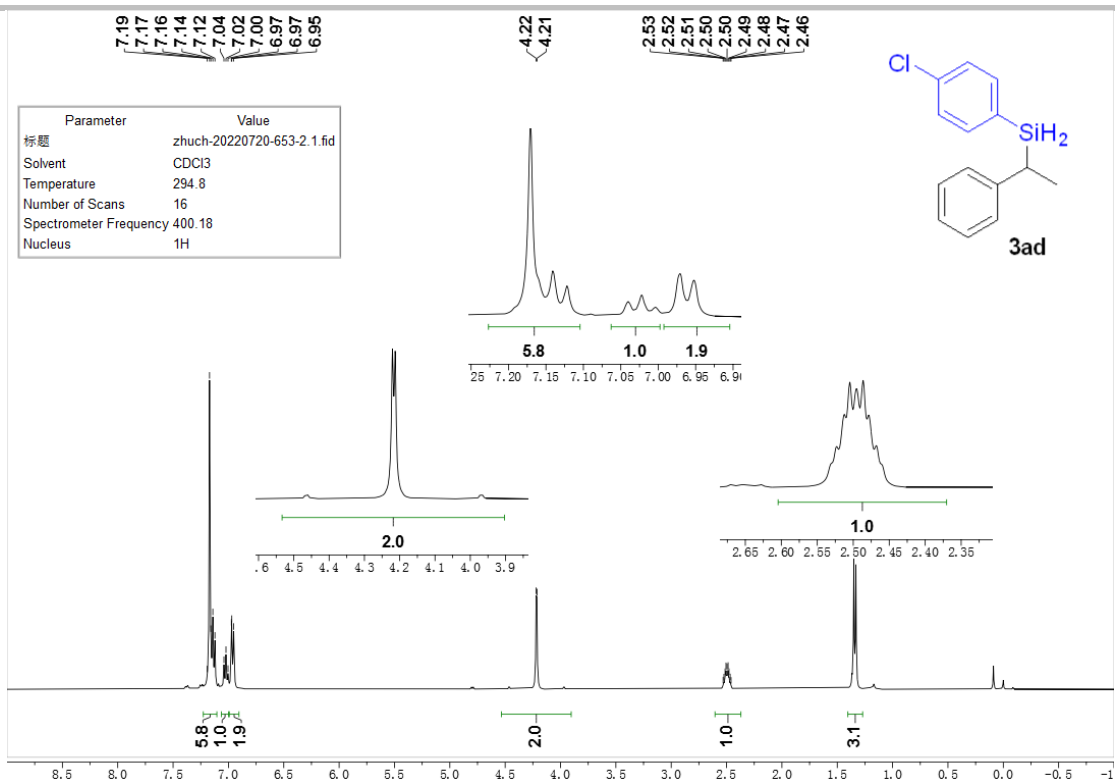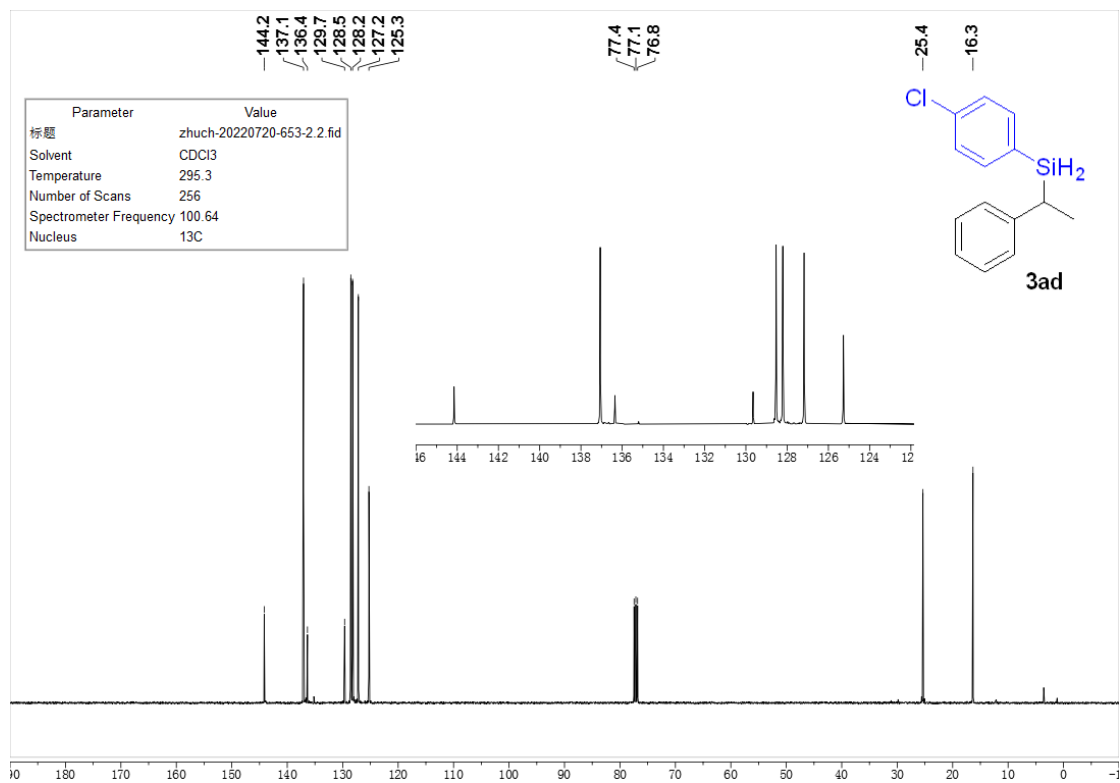



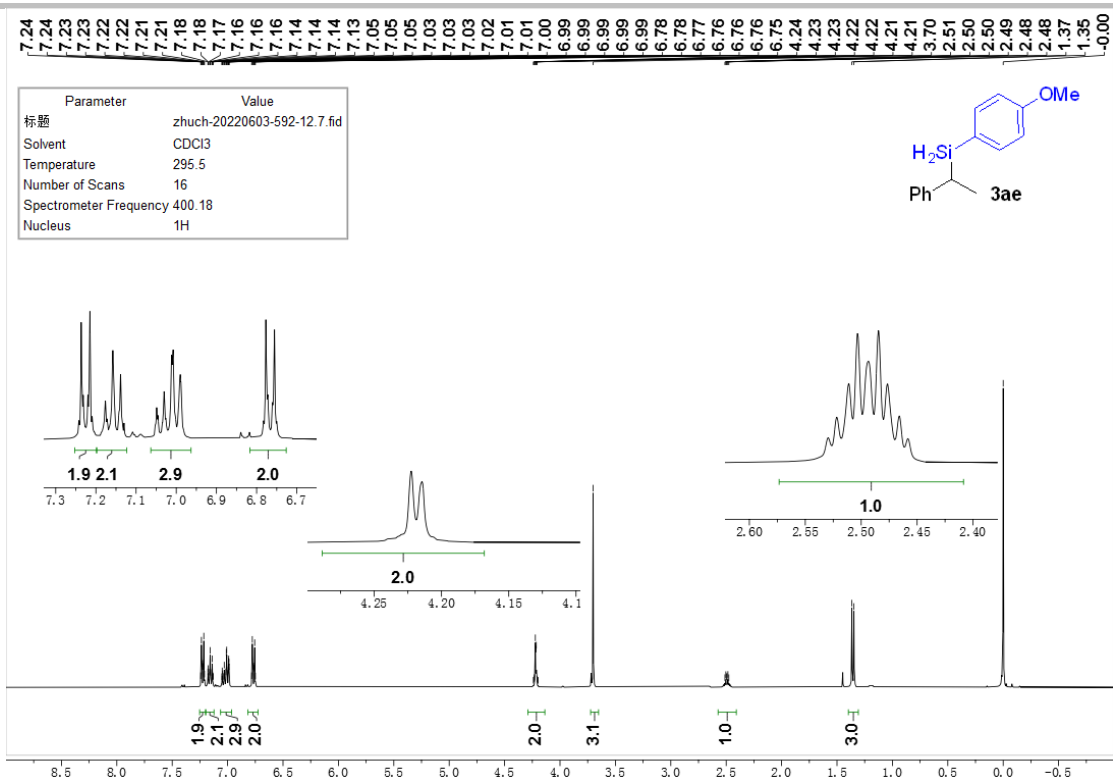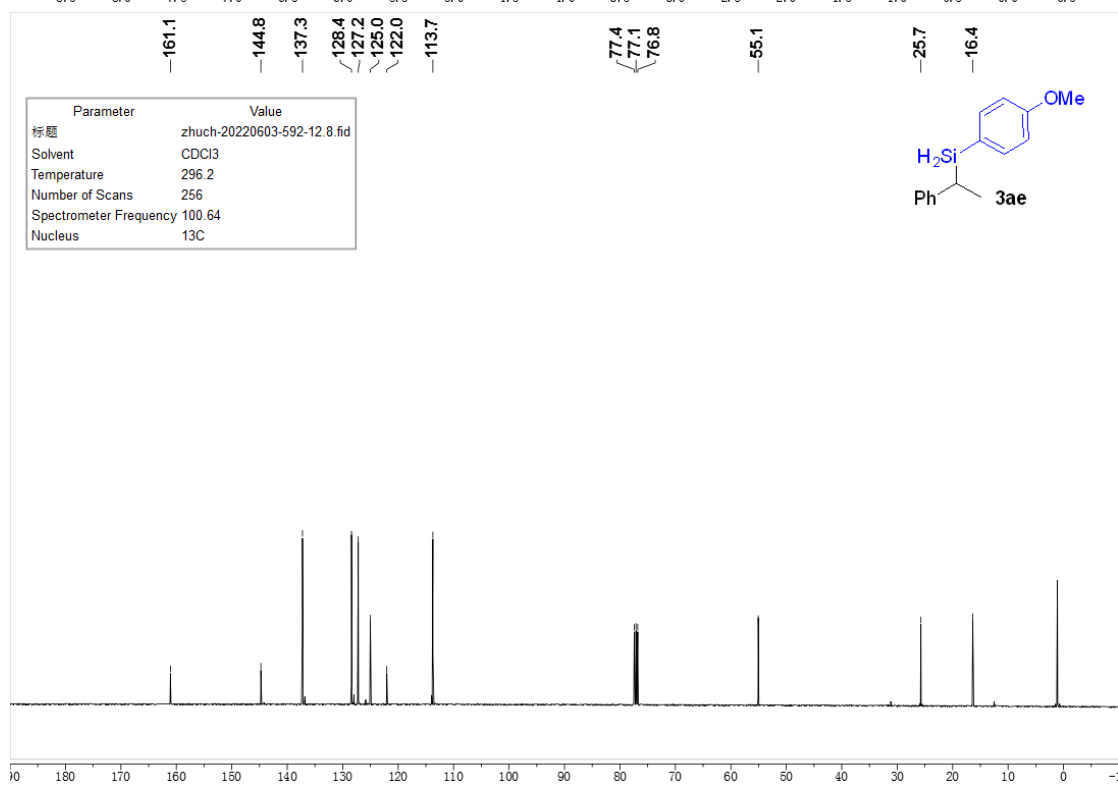

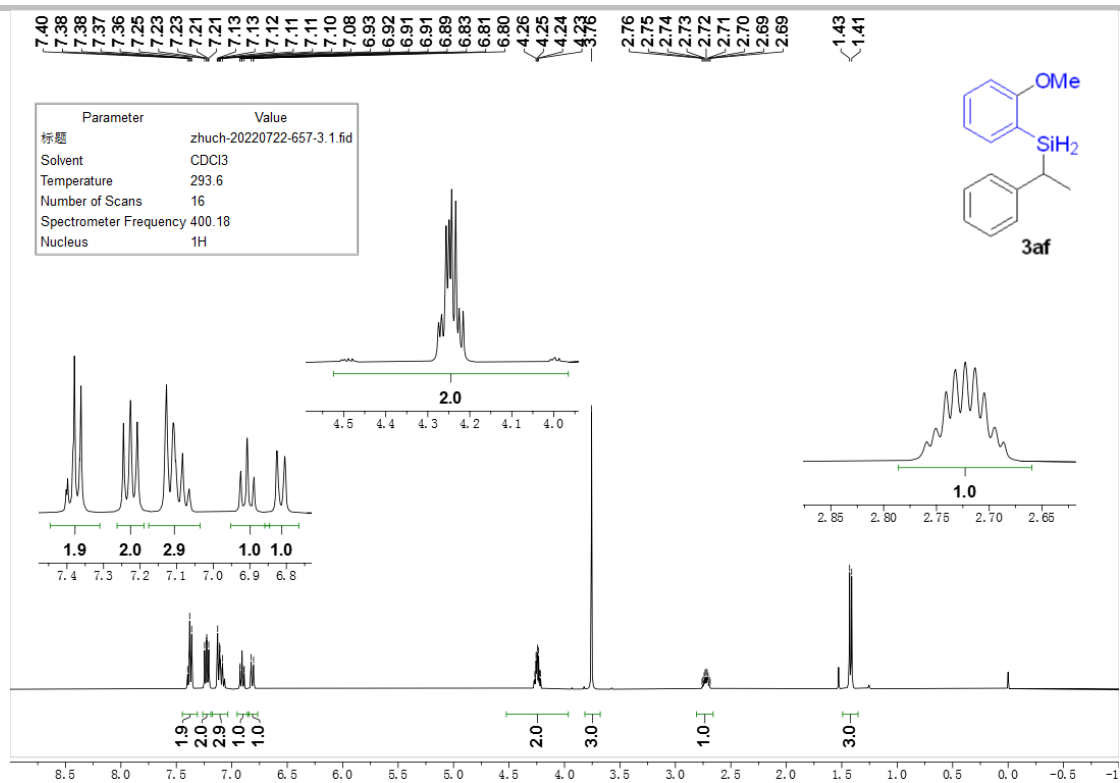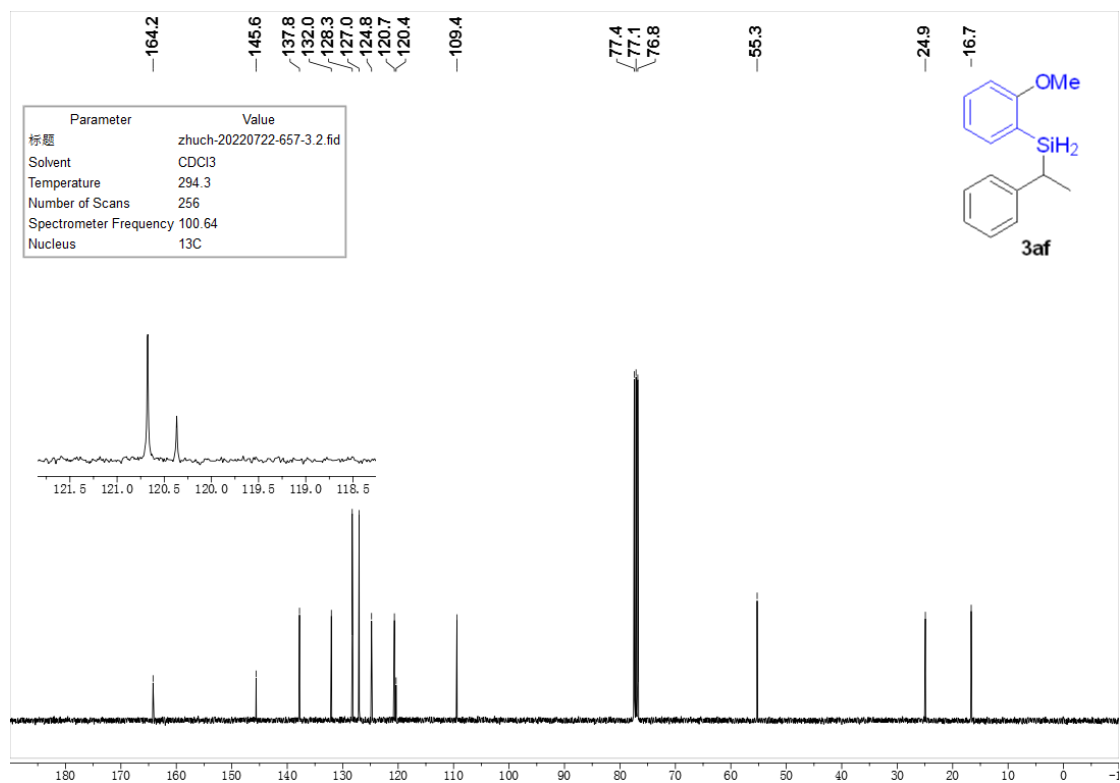

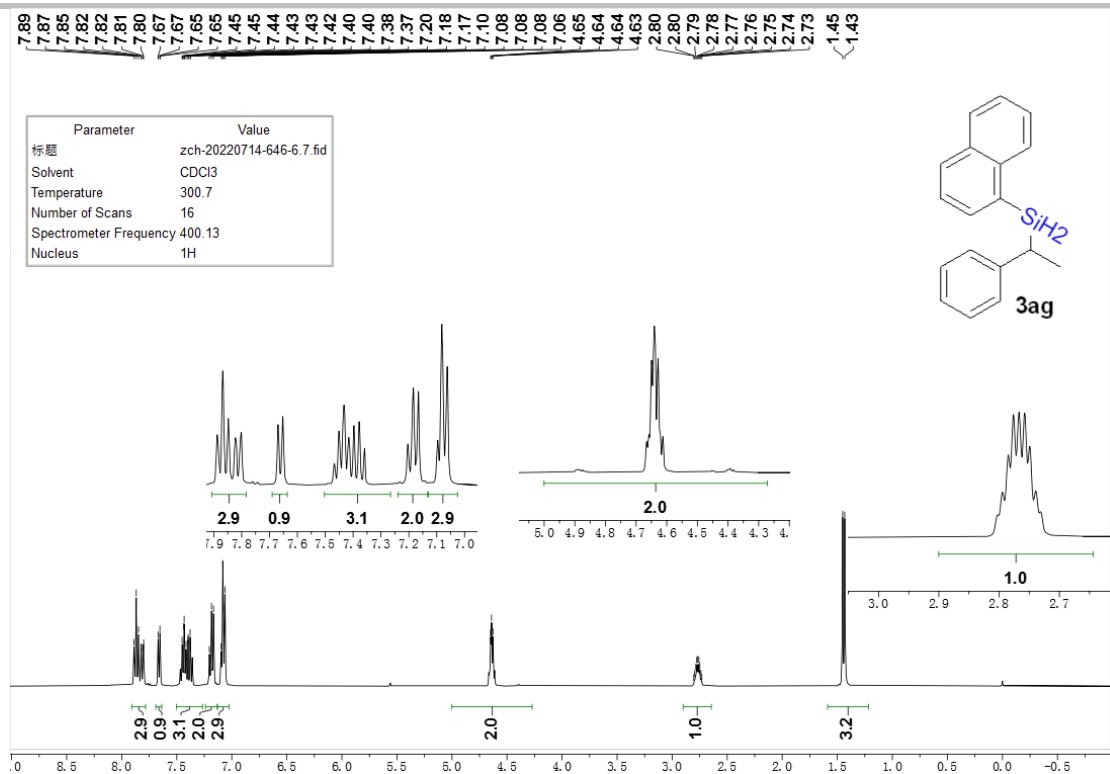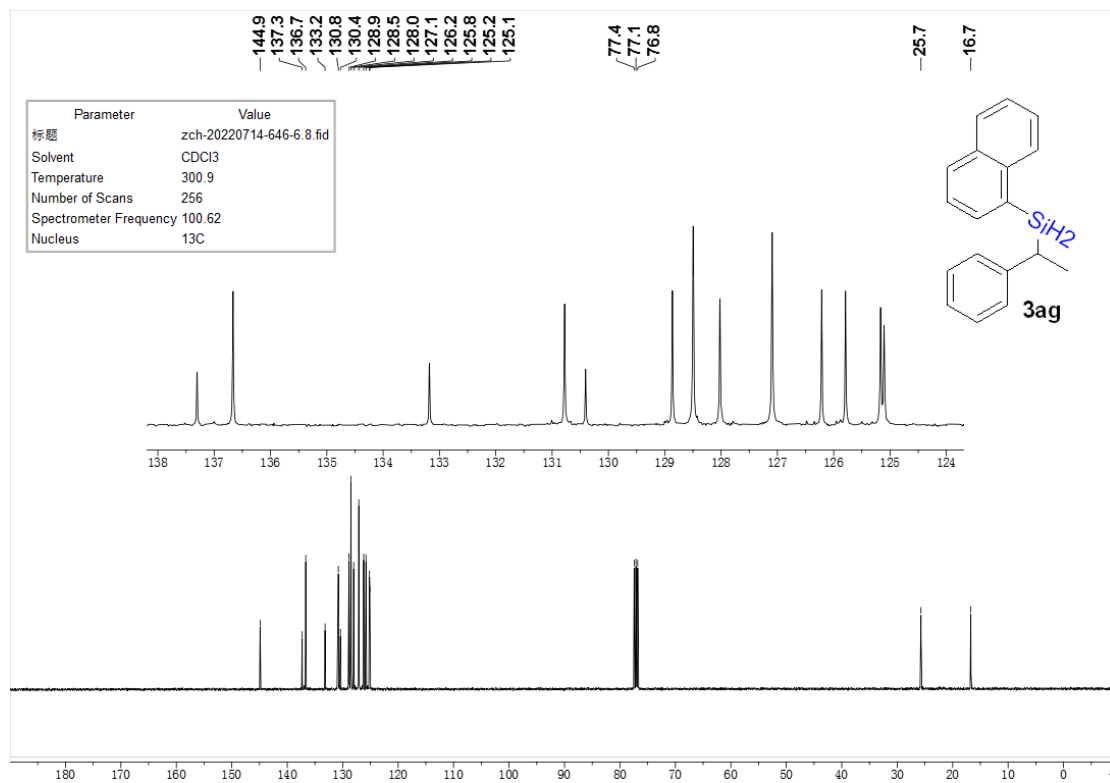

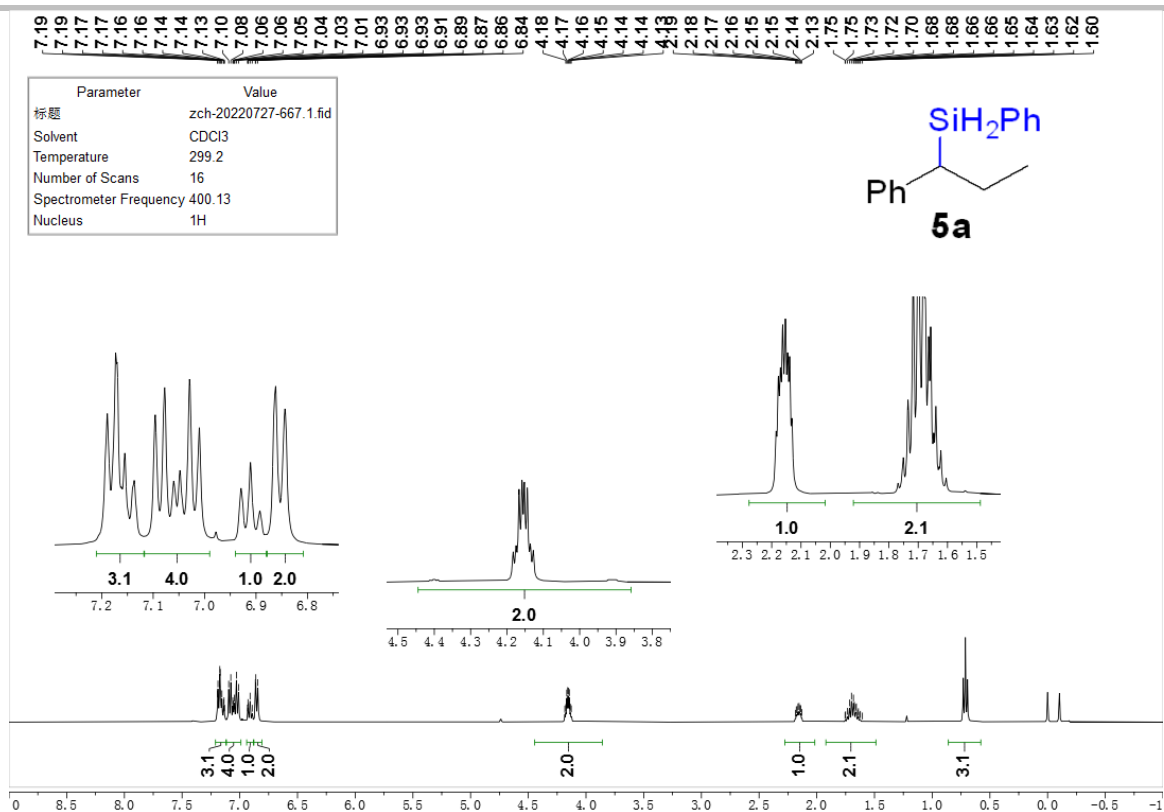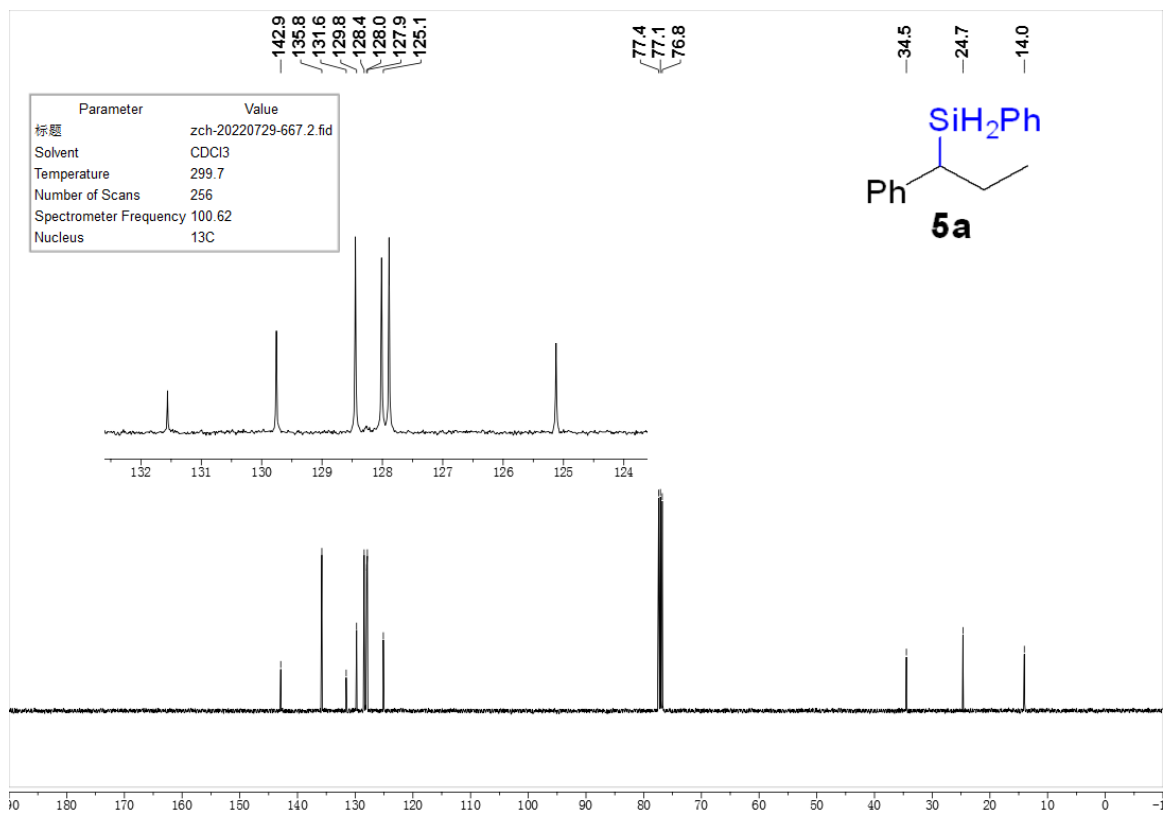

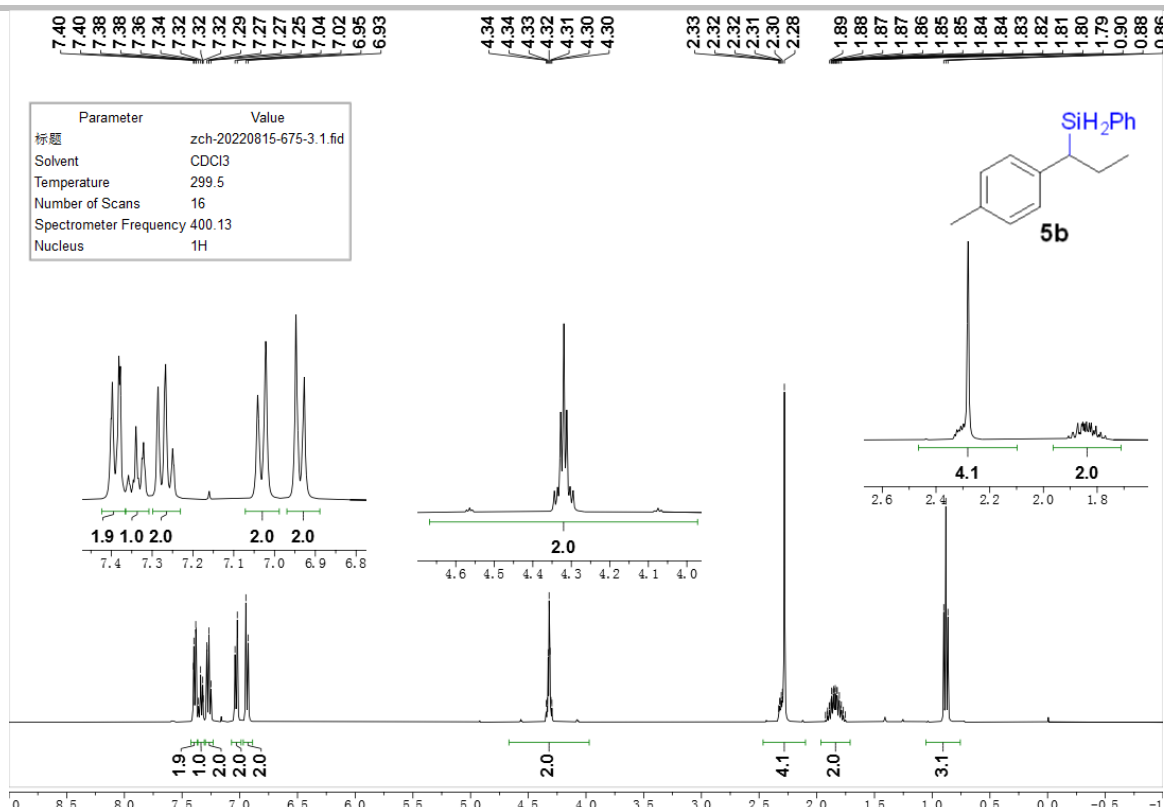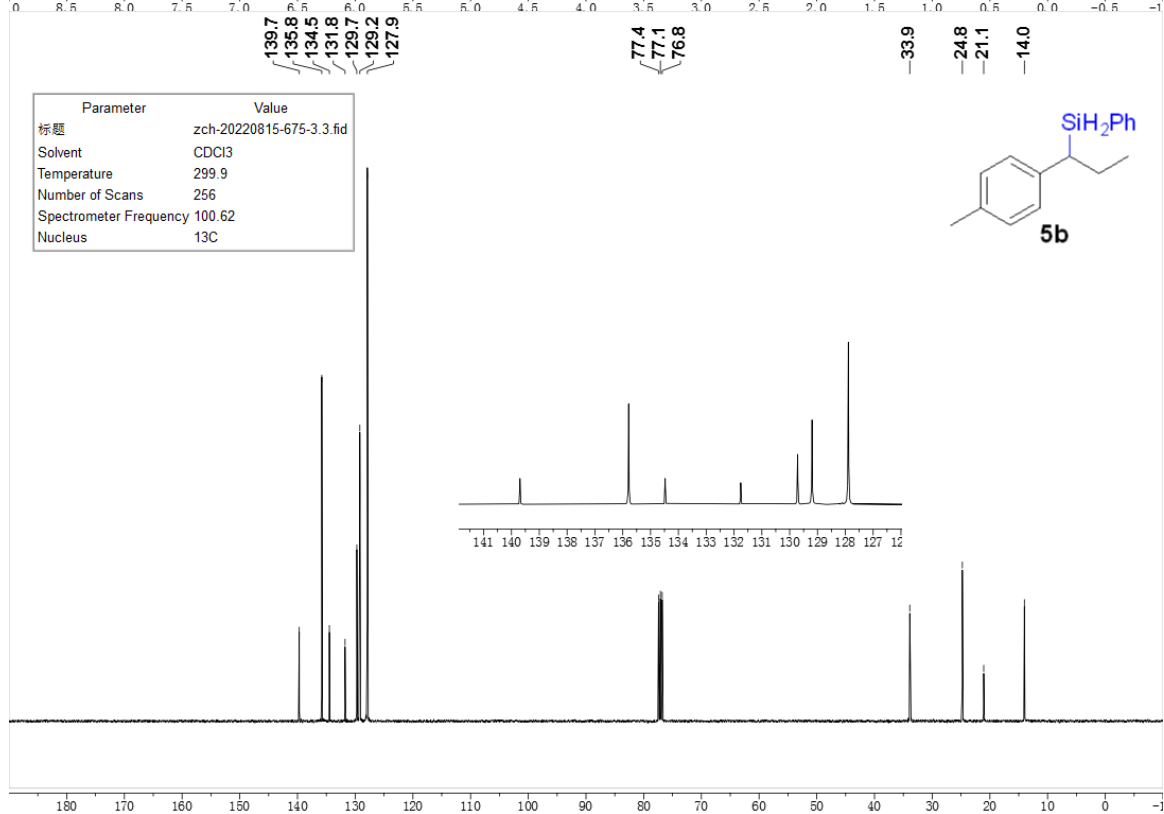

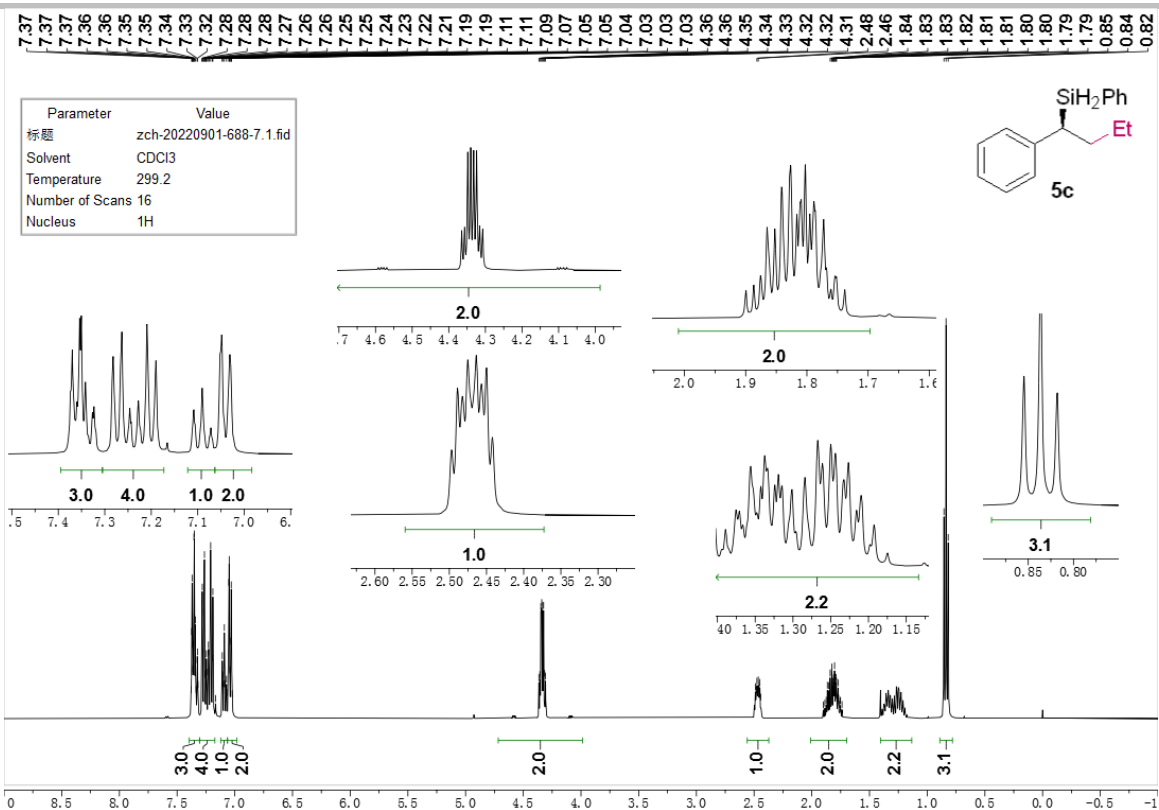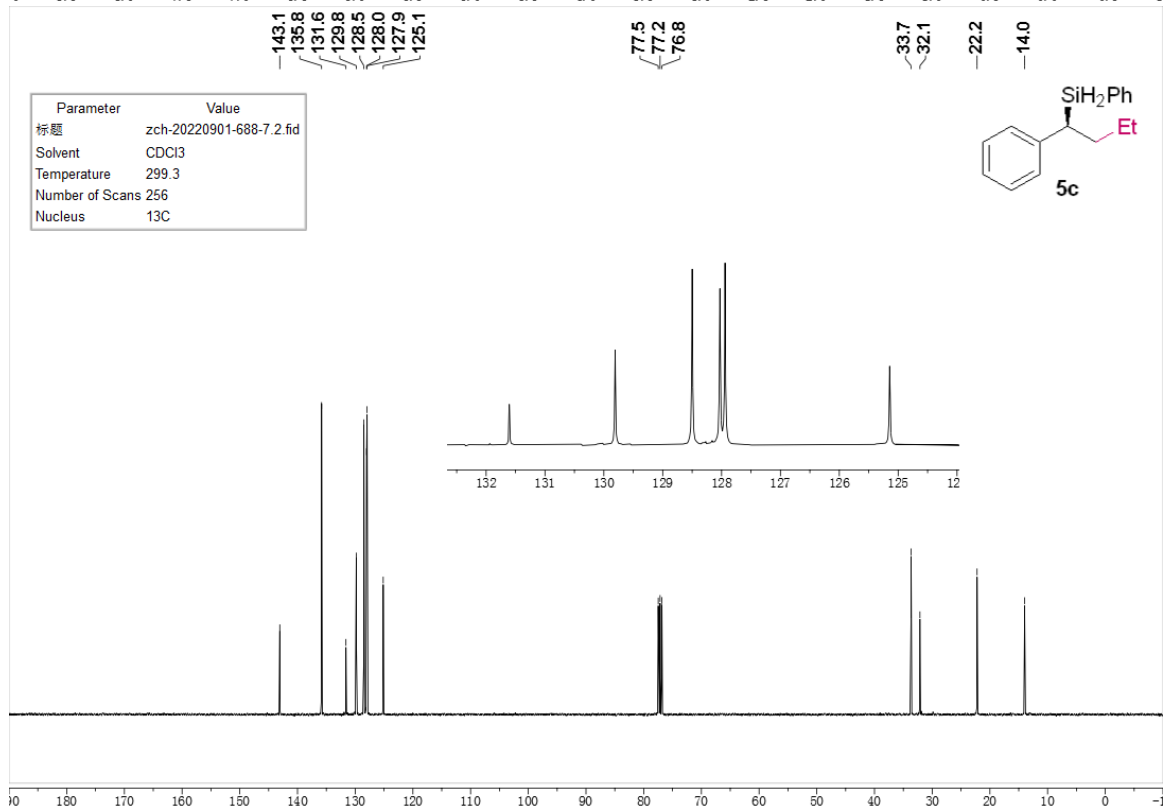

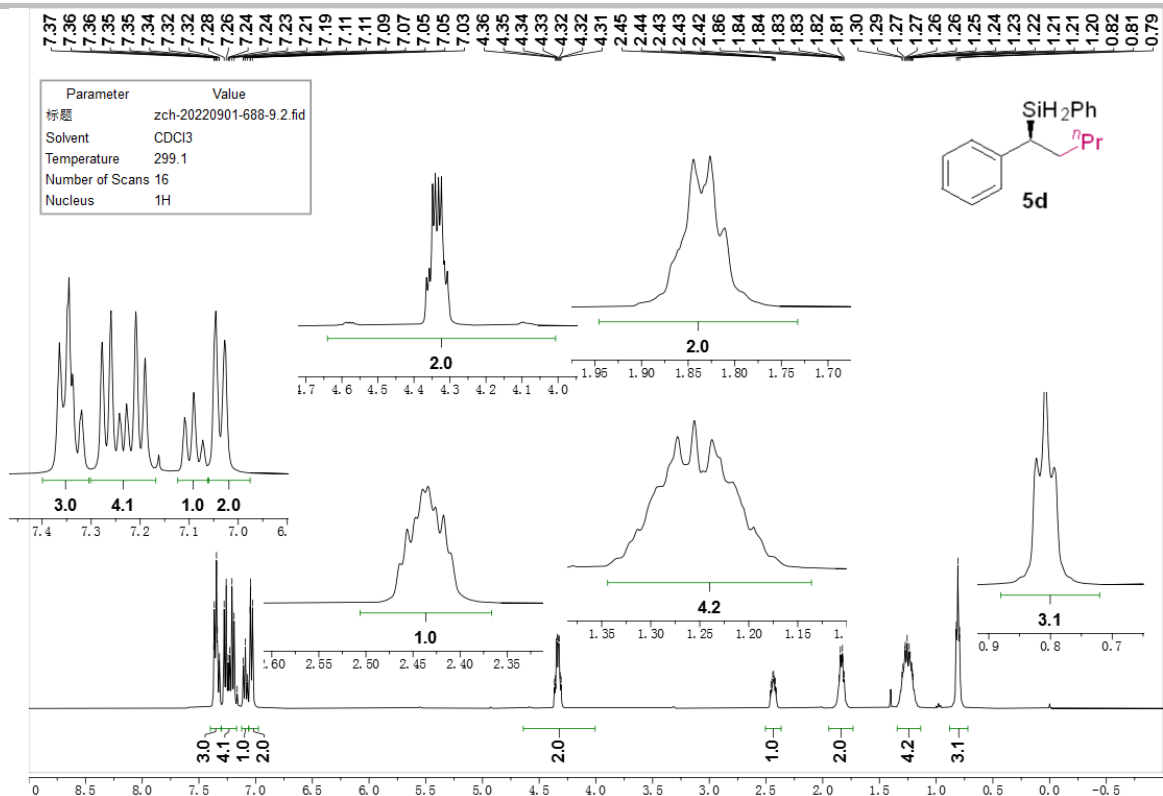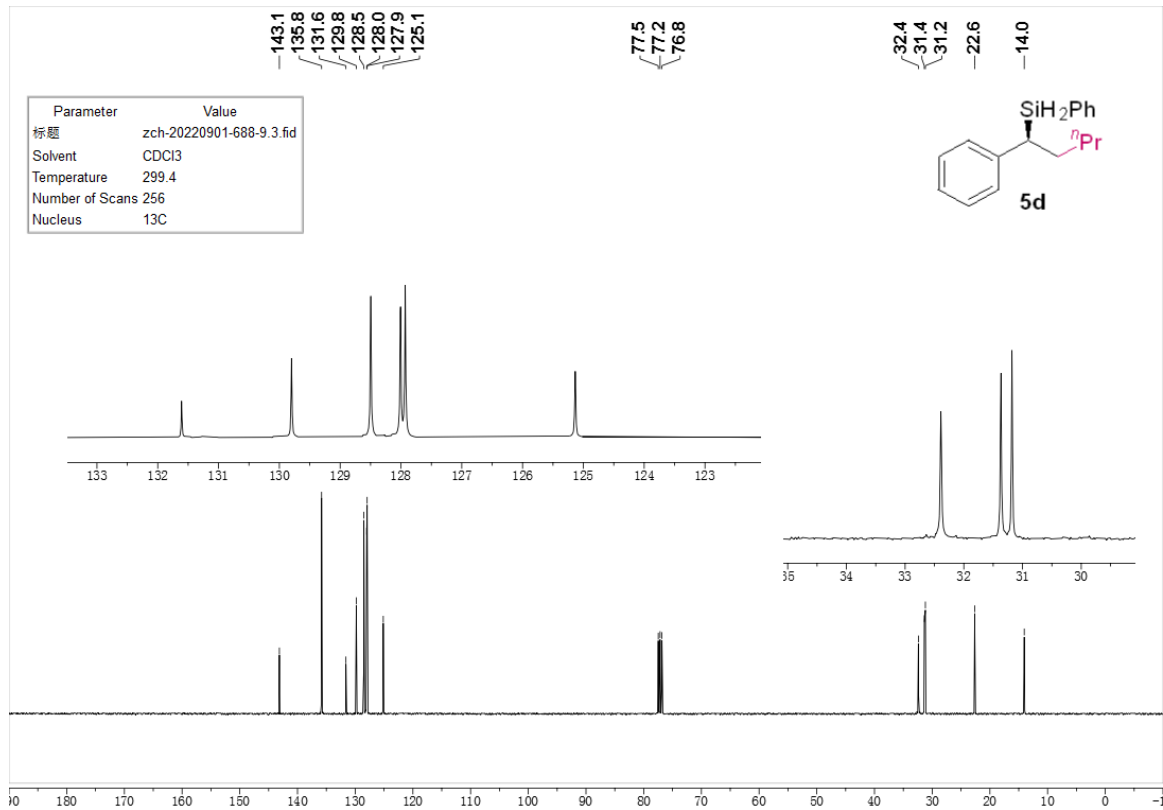

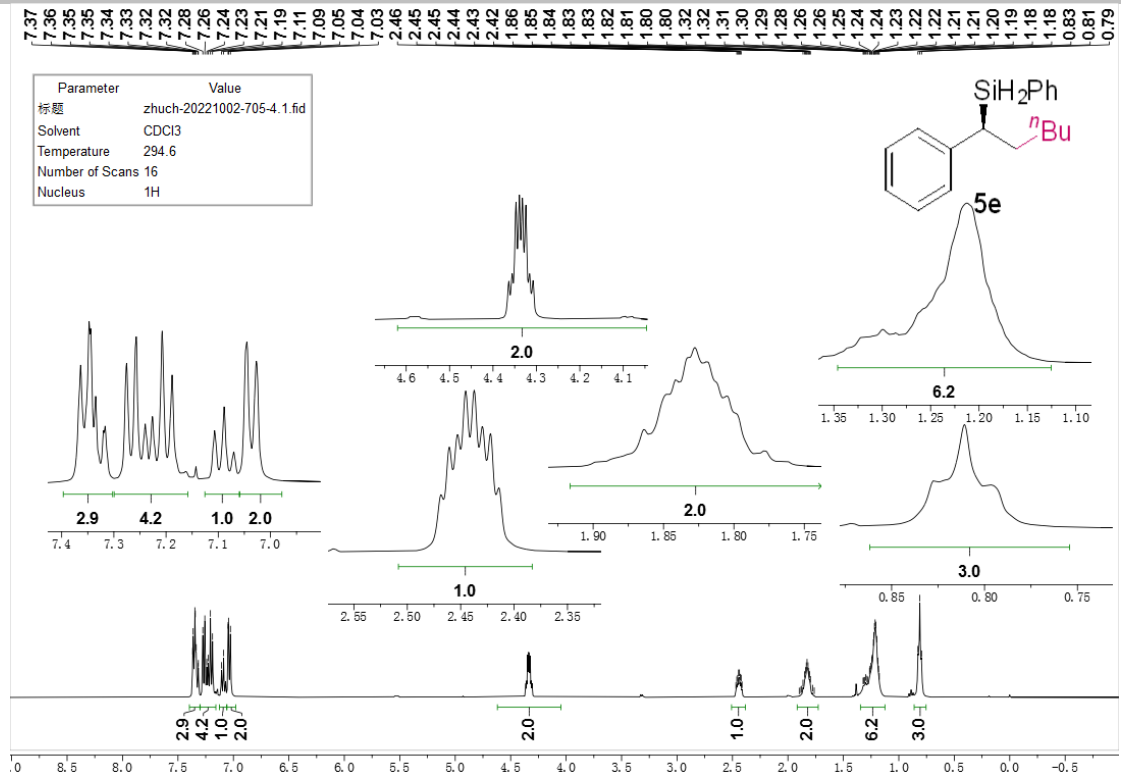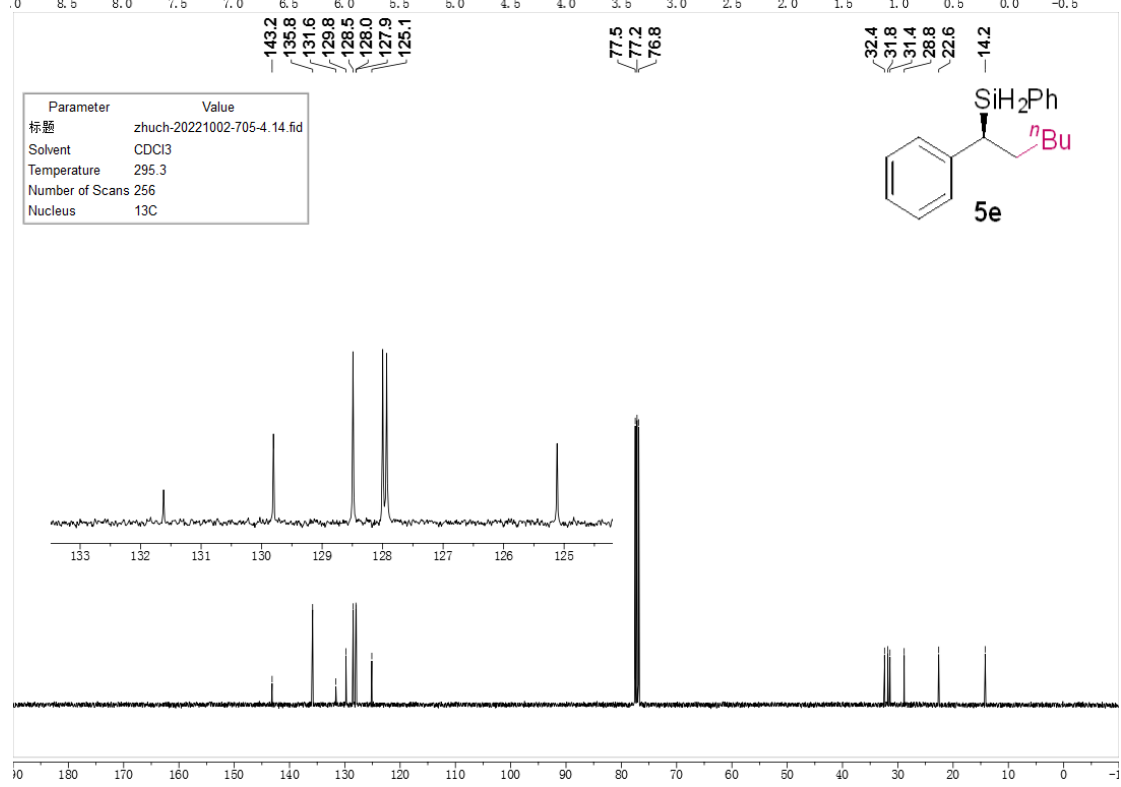



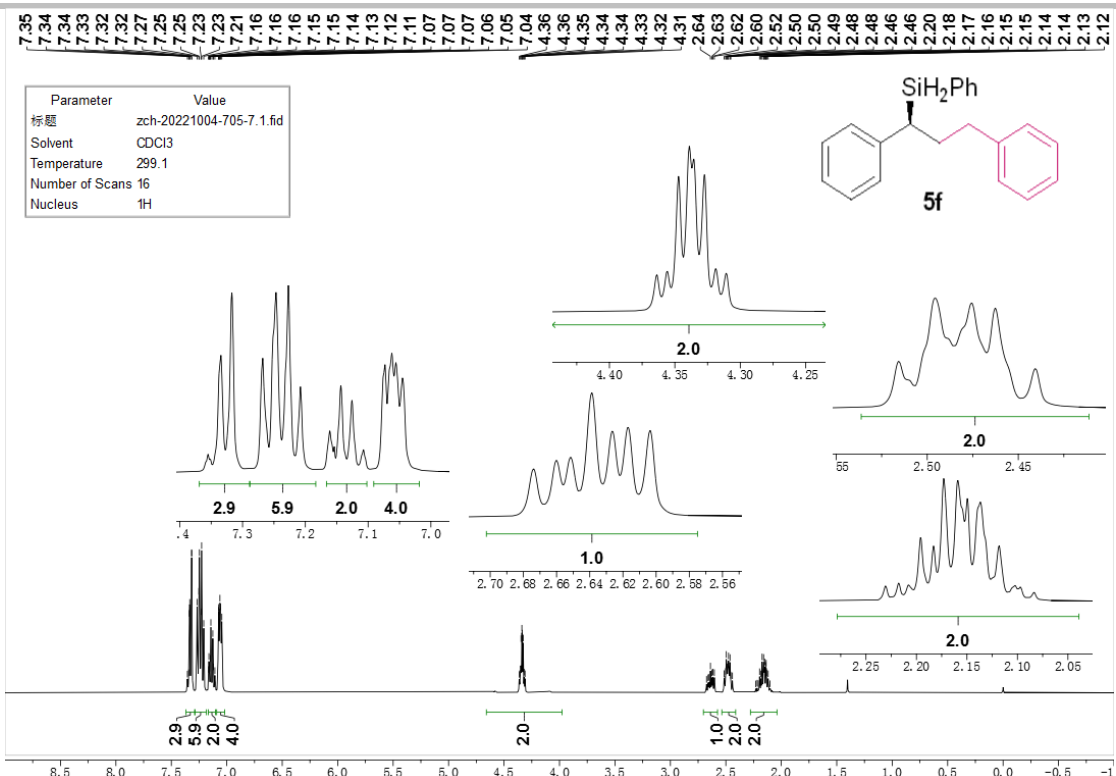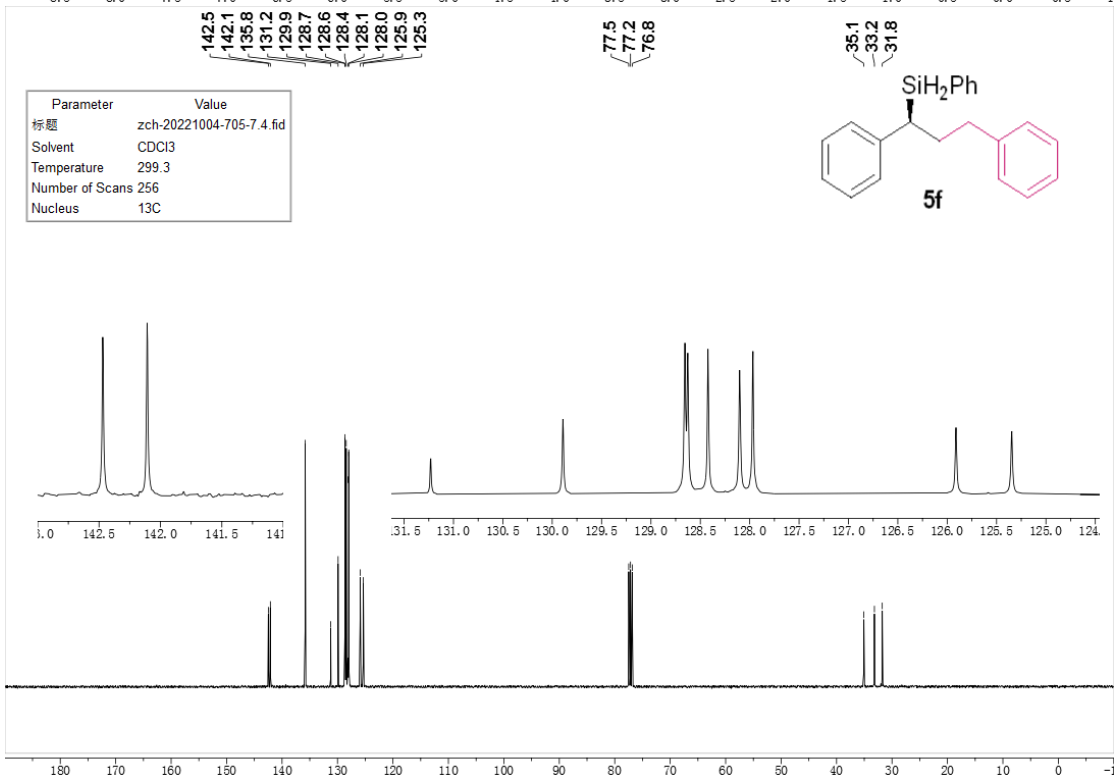

7.35  
7.35  
7.34  
7.34  
7.33  
7.33  
7.32  
7.29  
7.28  
7.28  
7.27  
7.26  
7.25  
7.21  
7.20  
7.19  
7.18  
7.18  
7.17  
7.17  
7.17  
7.16  
7.15  
7.14  
7.14  
7.14  
7.11  
7.11  
7.10  
7.10  
7.09  
7.08  
7.08  
7.07  
7.06  
7.06  
7.05  
7.05  
7.04  
7.04  
7.03  
7.03  
7.02  
4.40  
4.39  
4.38  
4.37  
4.37  
4.36  
4.35  
4.34  
3.16  
3.14  
2.82  
2.82

| Parameter       | Value                    |
|-----------------|--------------------------|
| 标题              | zch-20220919-698-2.1.fid |
| Solvent         | CDCl3                    |
| Temperature     | 298.7                    |
| Number of Scans | 16                       |
| Nucleus         | 1H                       |

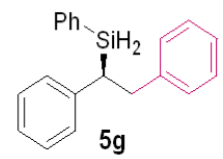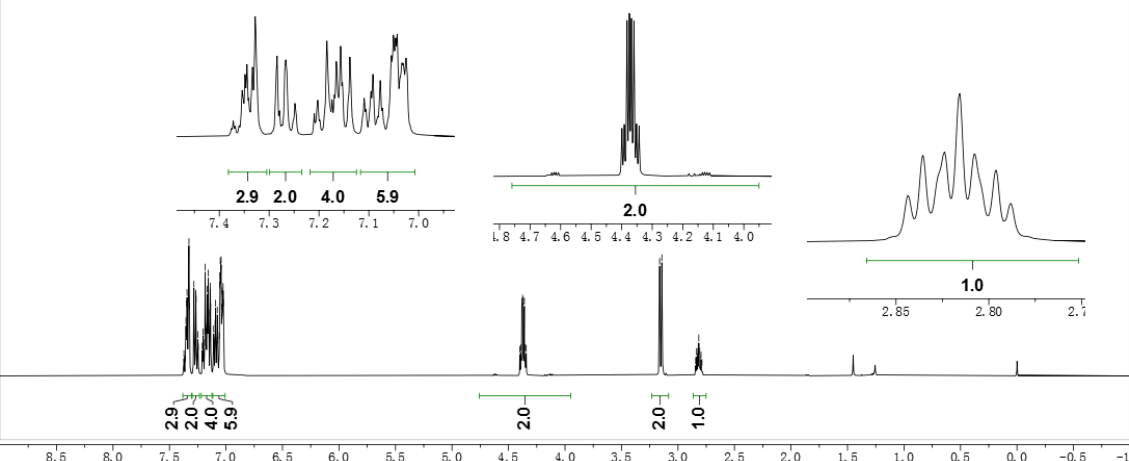

142.3  
141.2  
135.9  
131.1  
129.9  
128.8  
128.5  
128.3  
128.2  
126.0  
125.4  
77.5  
77.2  
76.8  
37.8  
34.3

| Parameter       | Value                    |
|-----------------|--------------------------|
| 标题              | zch-20220919-698-2.3.fid |
| Solvent         | CDCl3                    |
| Temperature     | 299.2                    |
| Number of Scans | 256                      |
| Nucleus         | 13C                      |

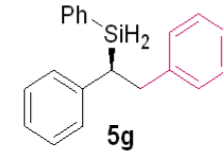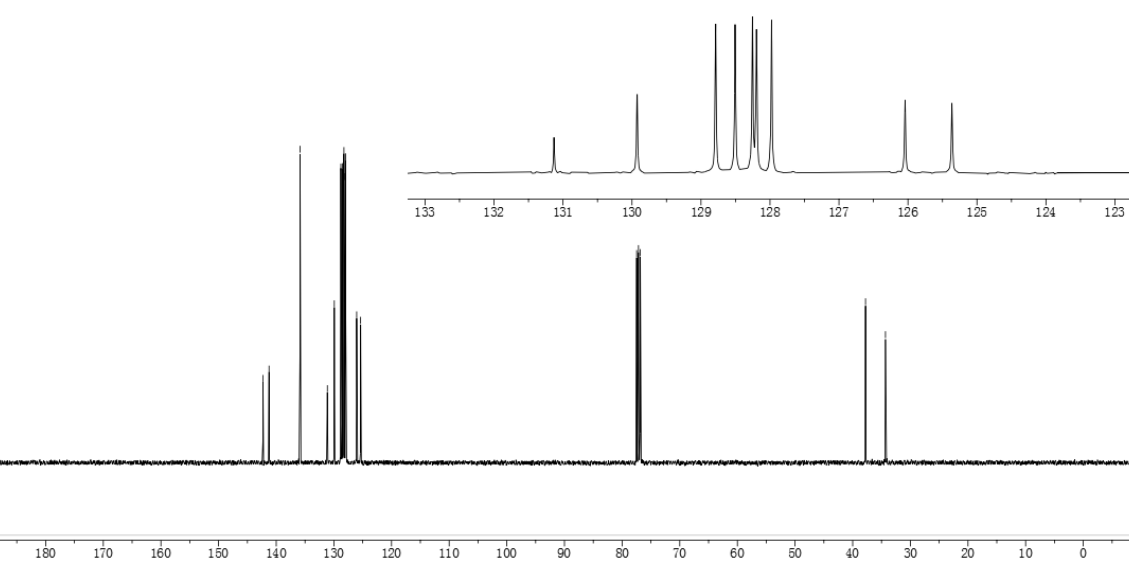

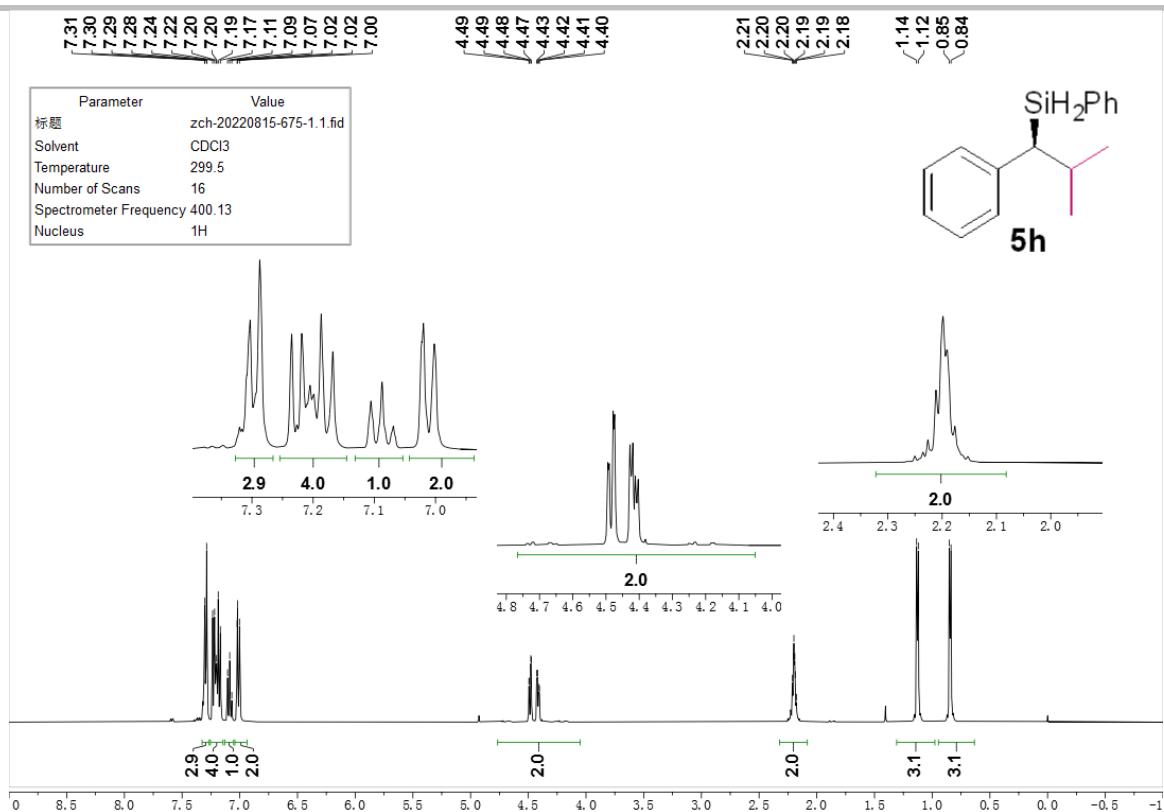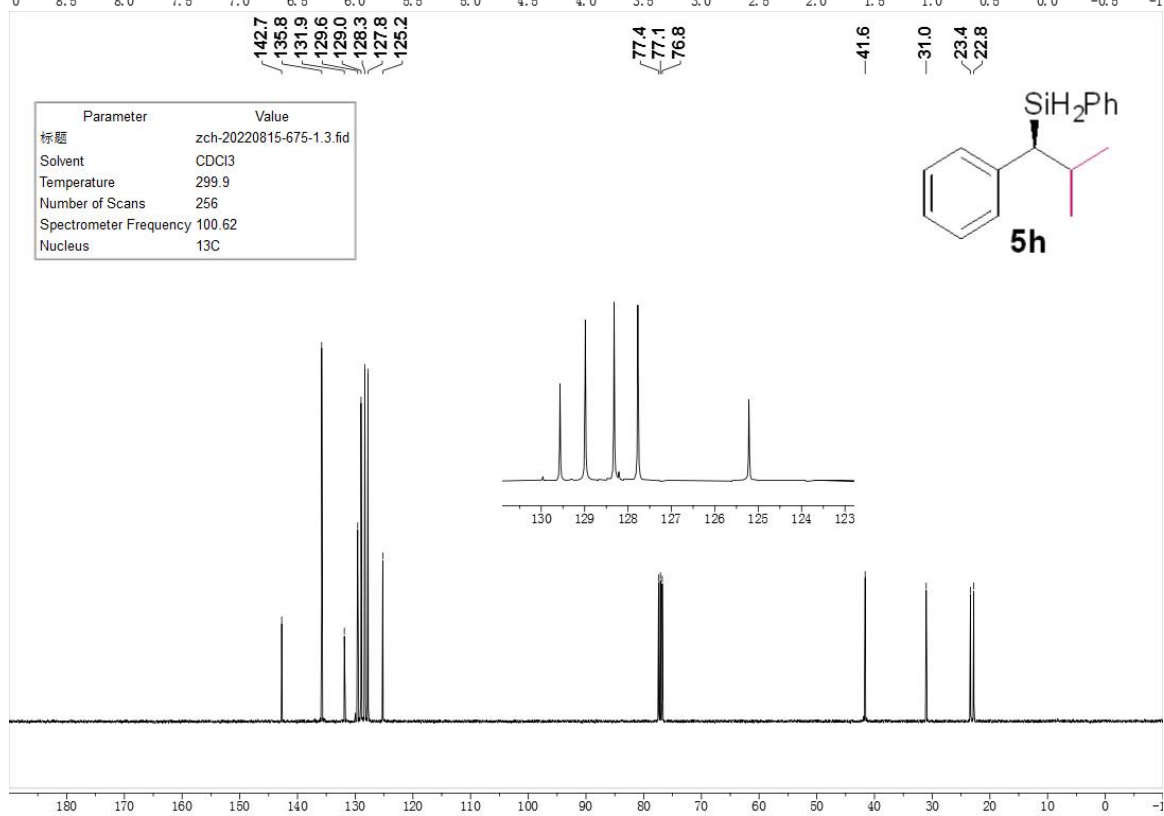

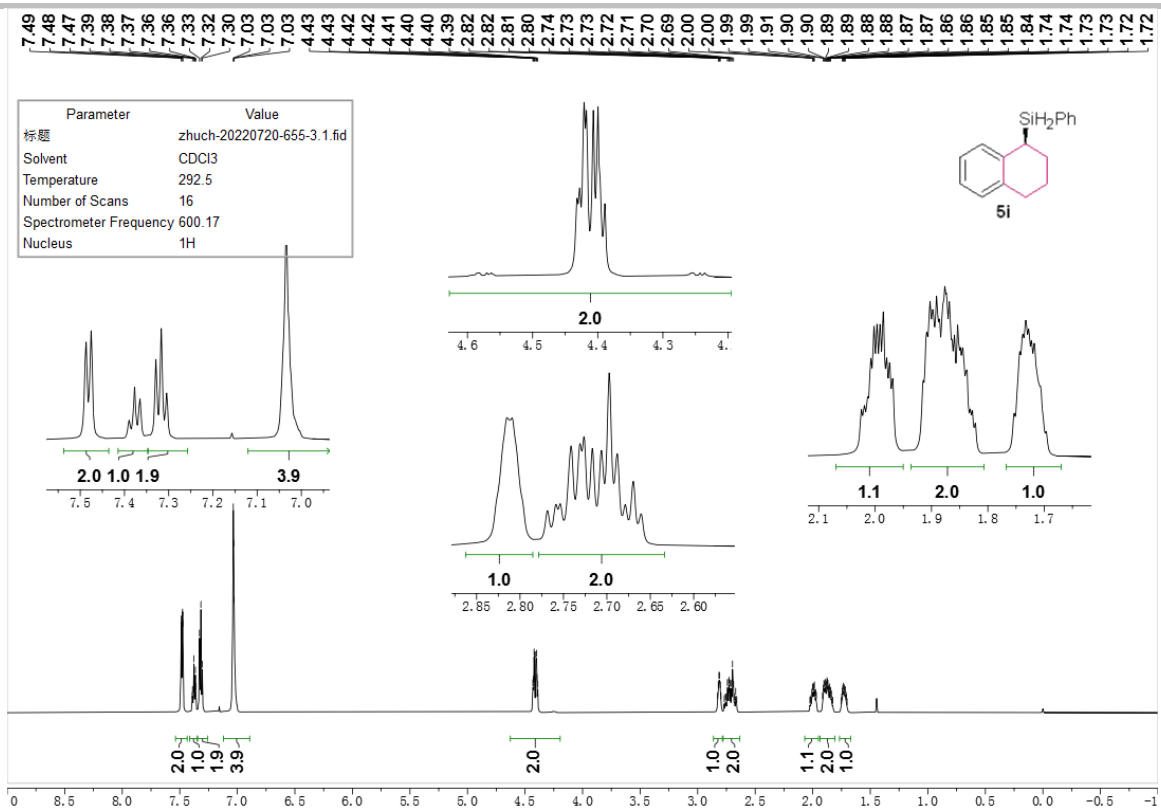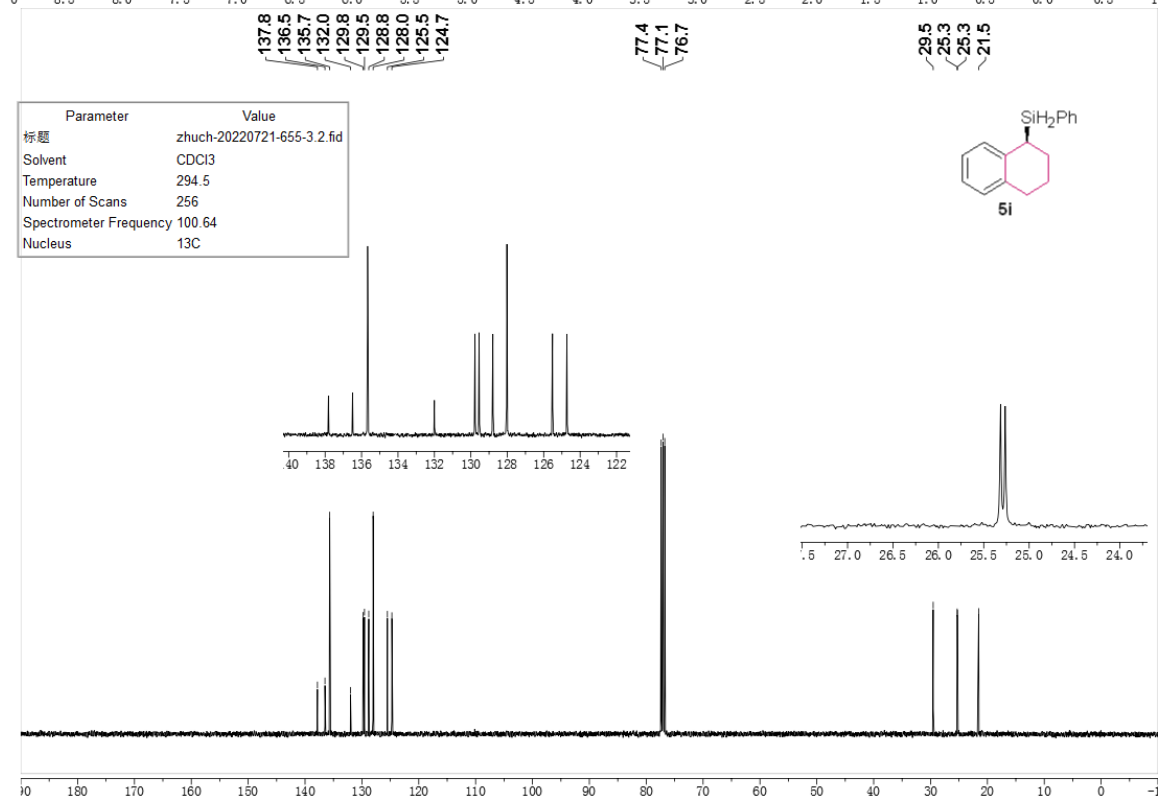

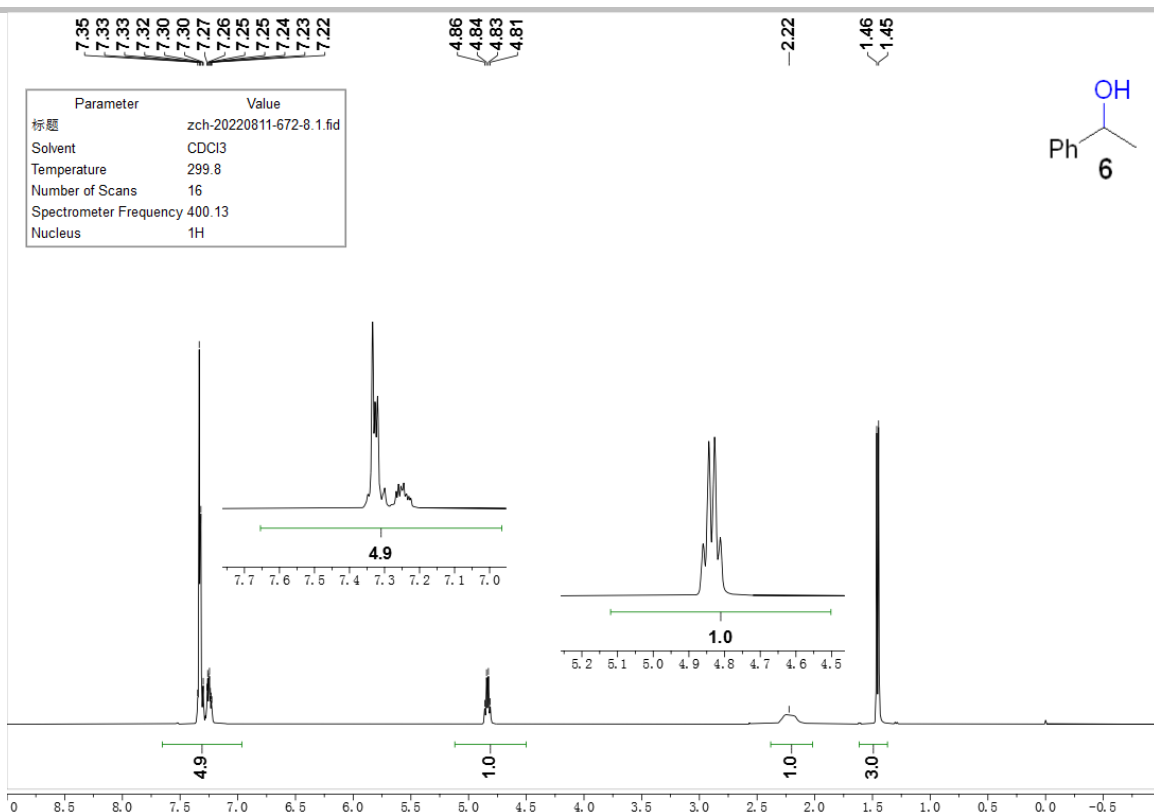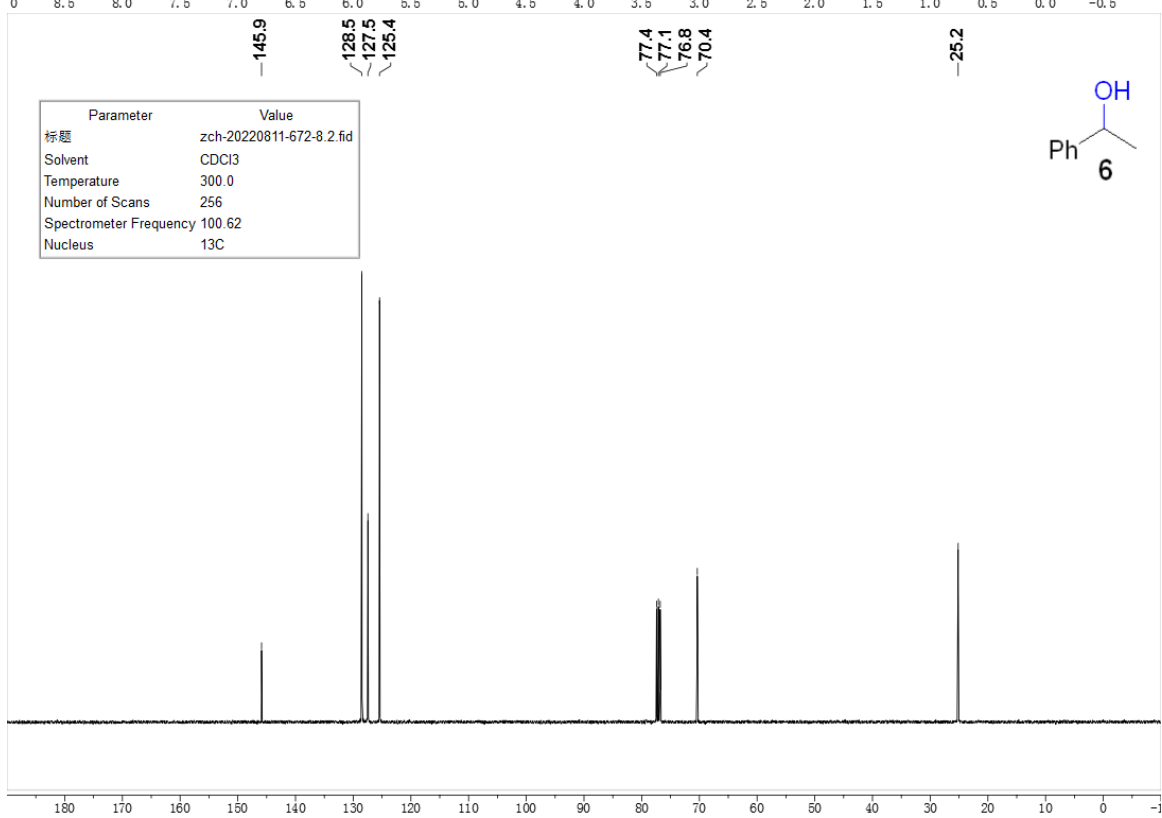

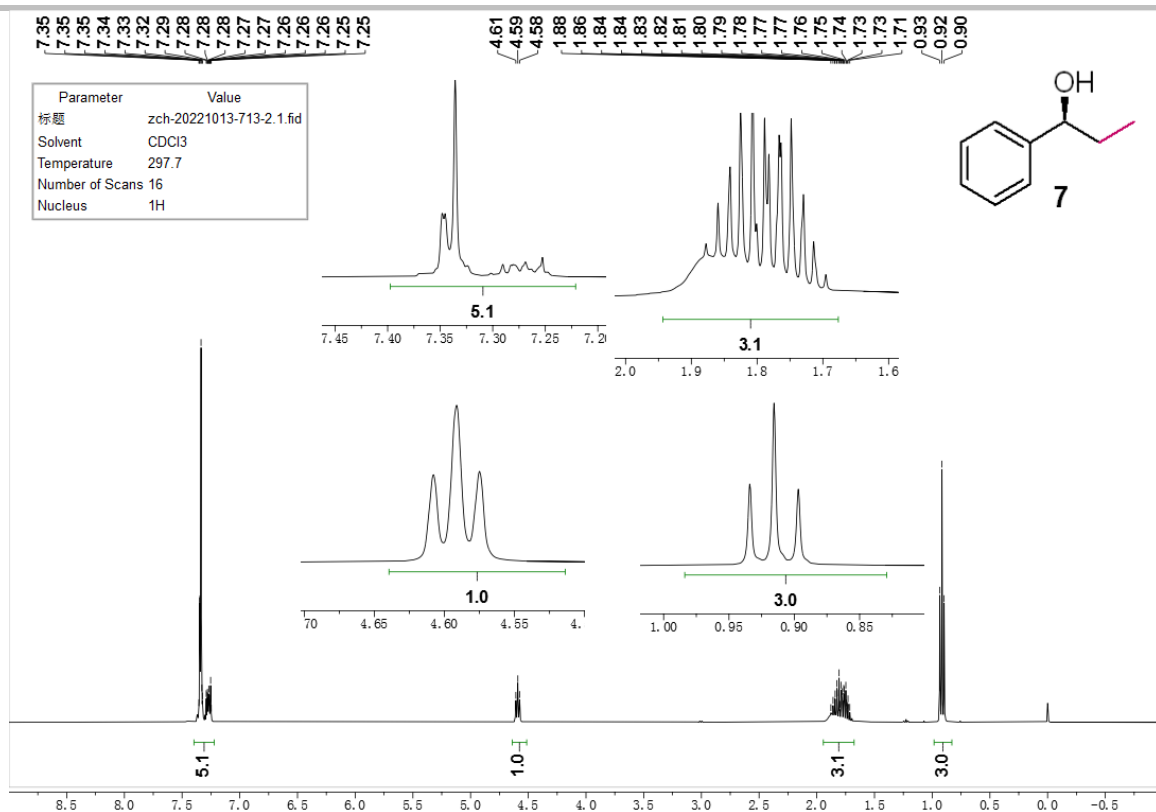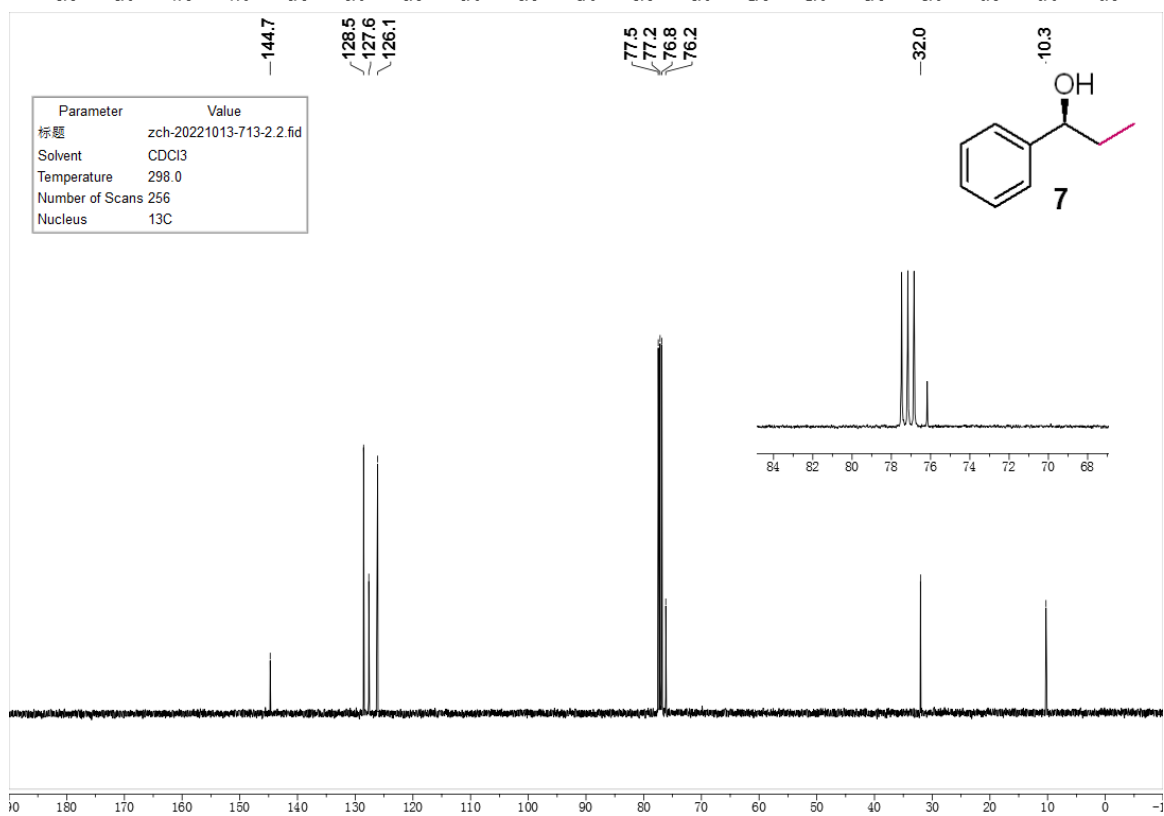

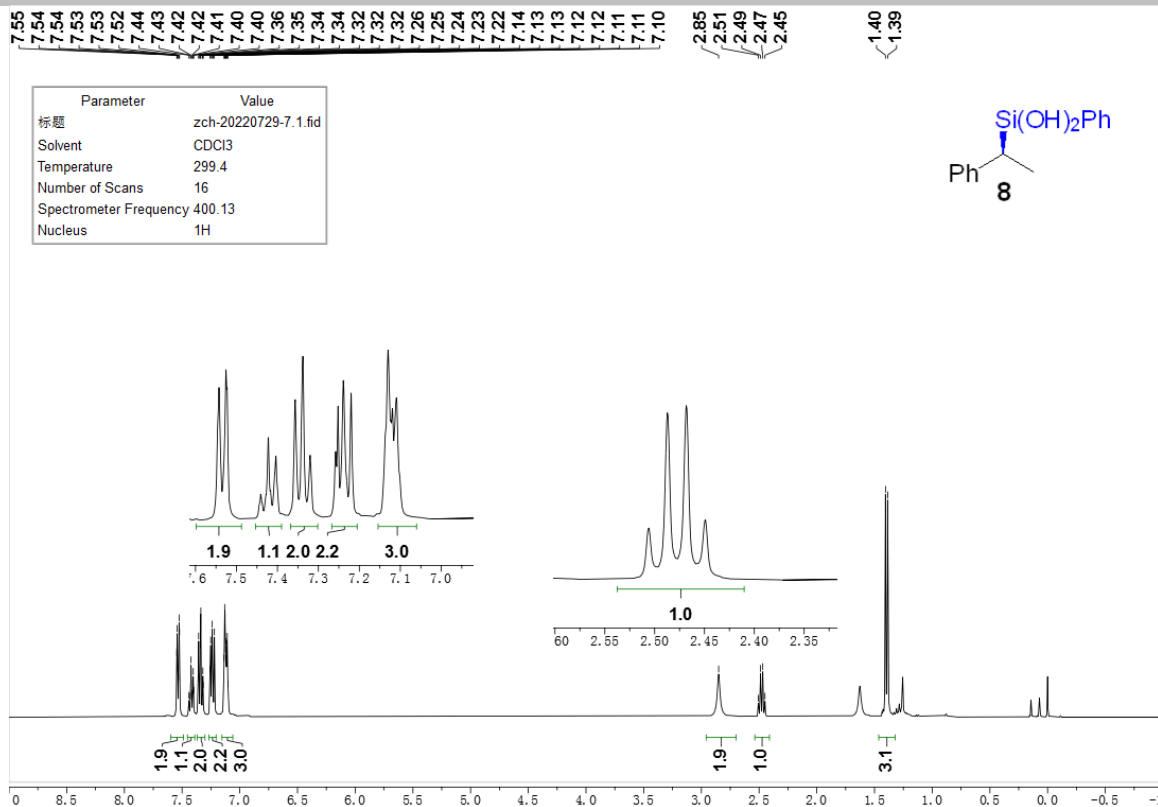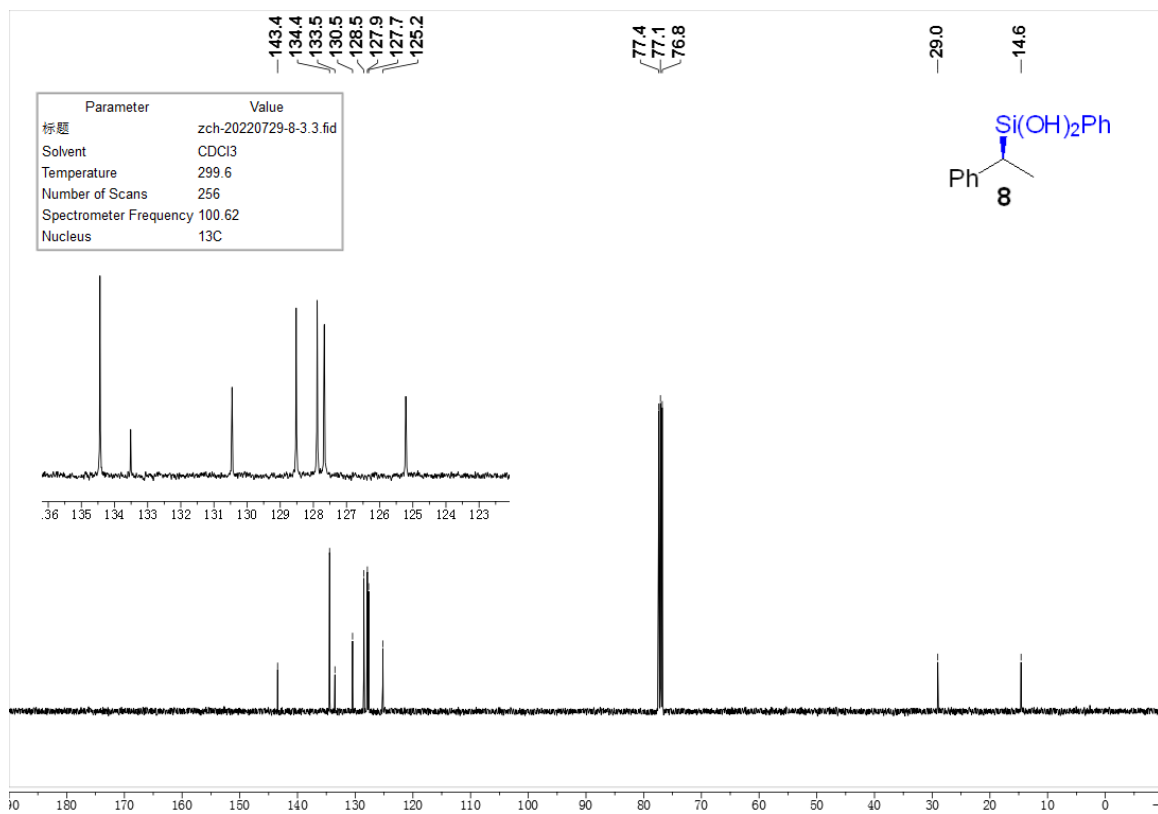

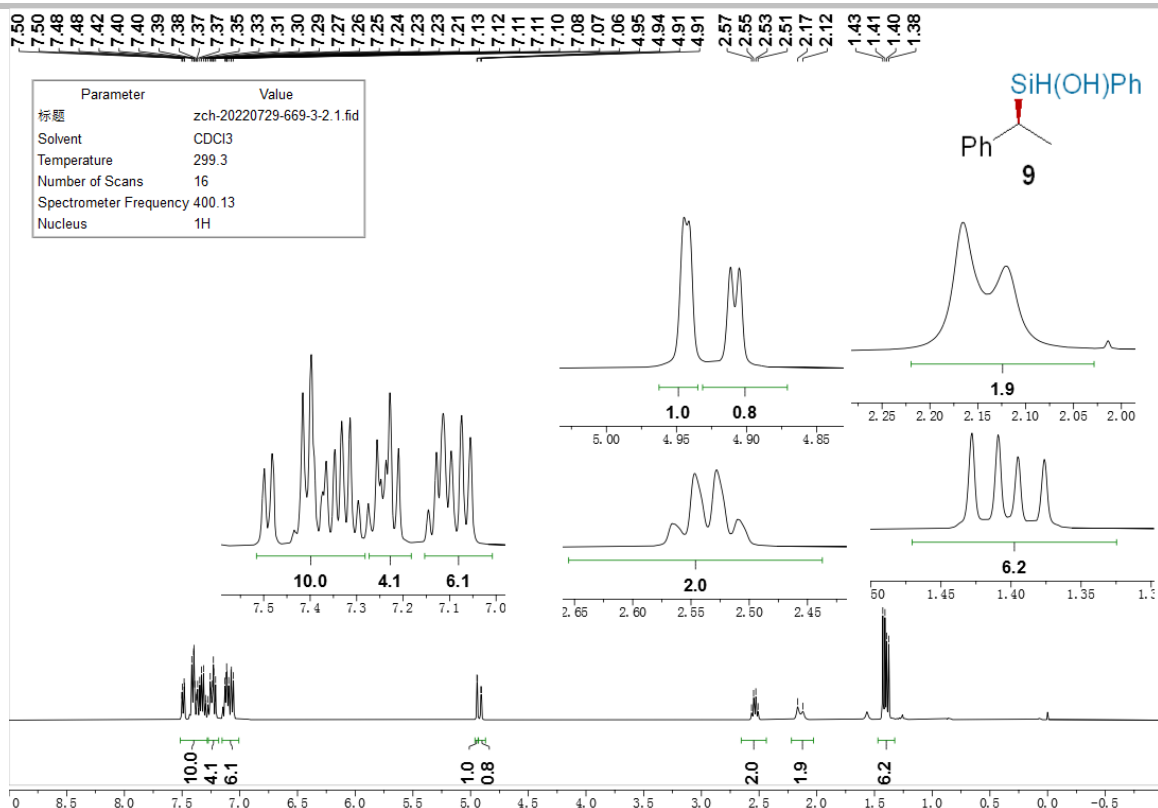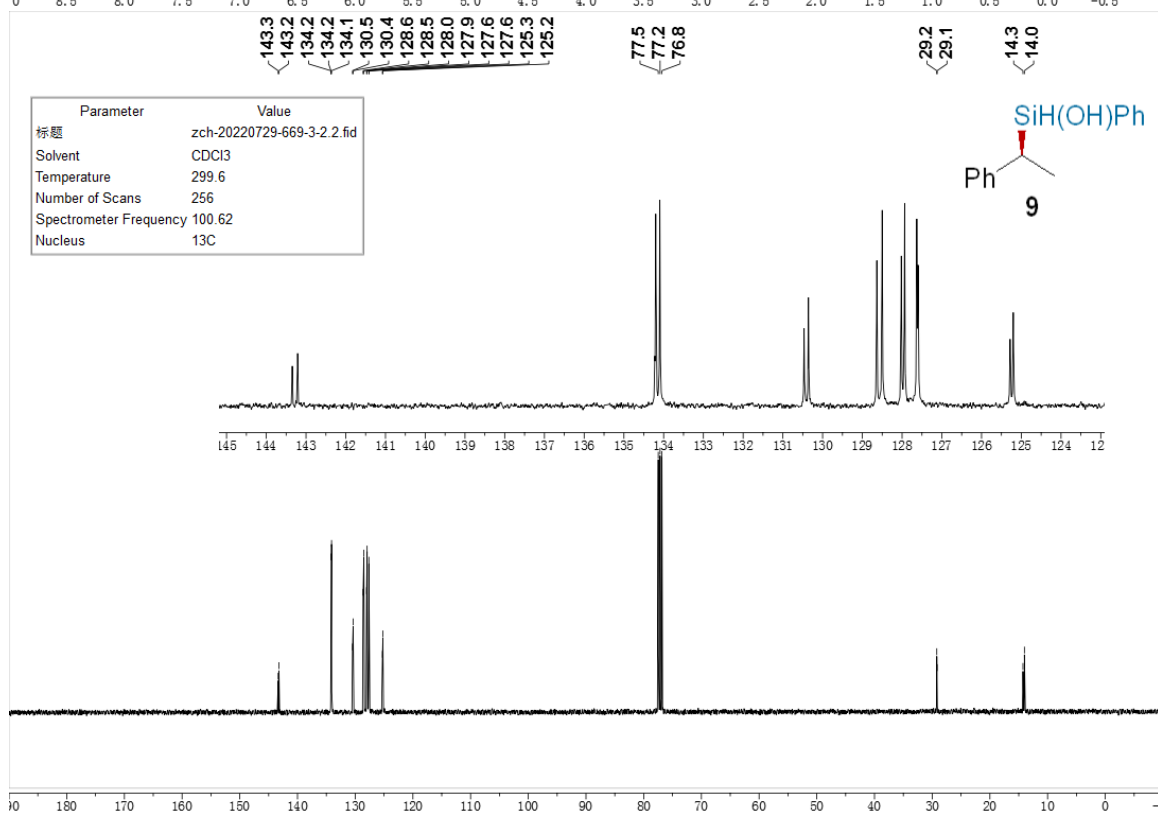



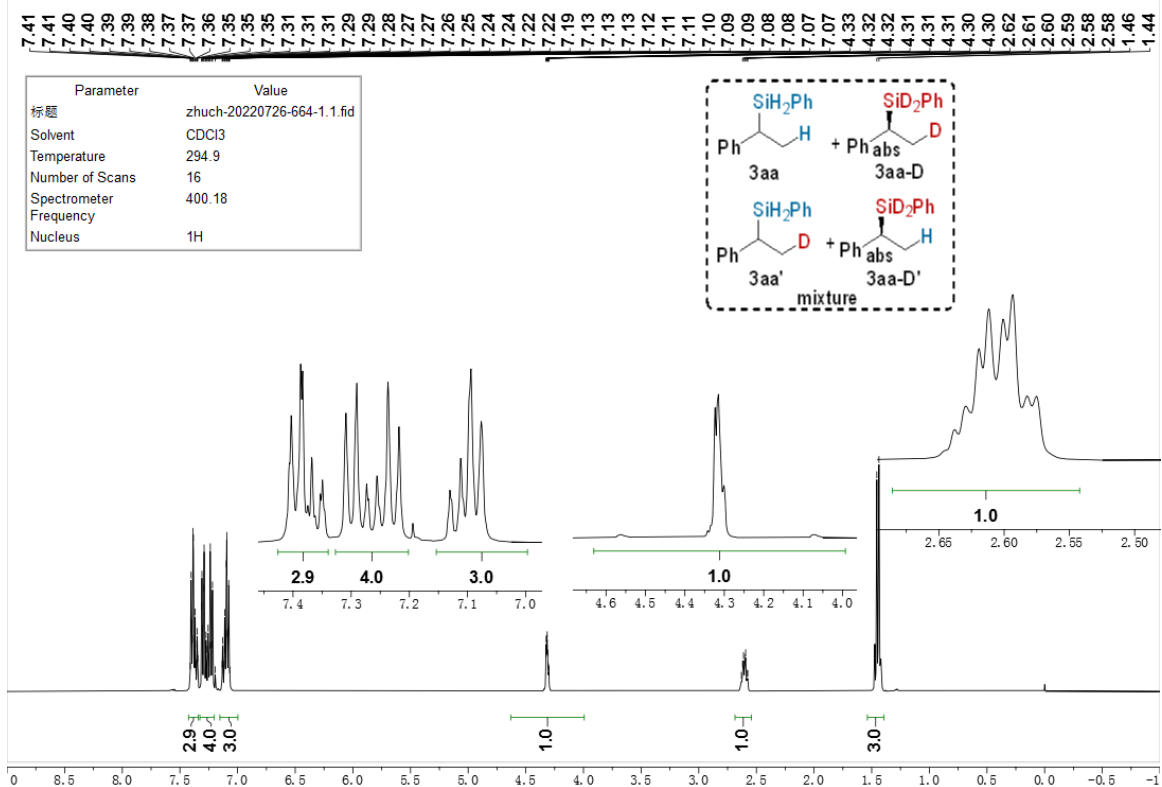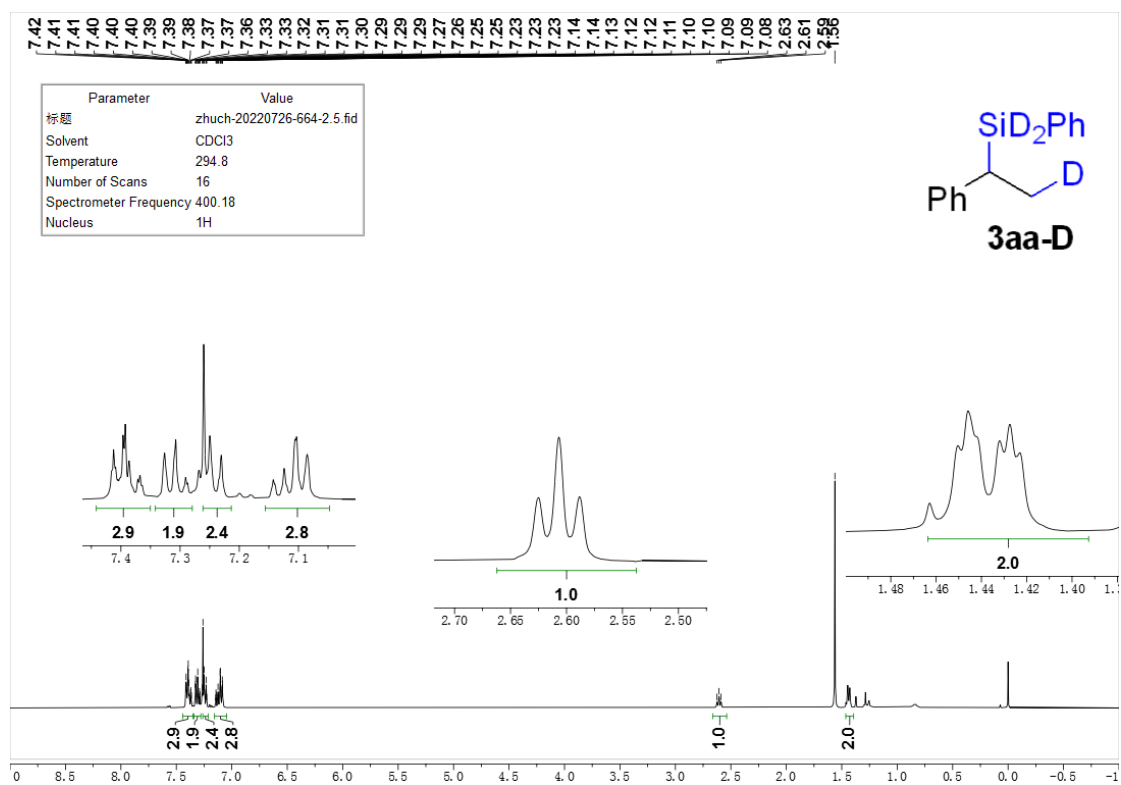

Supplement: d2qo01930b1.pdf [file d2qo01930b1.pdf]
